# Supplementary material for: Statistical Methods for Detecting Differentially Abundant Features in Clinical Metagenomic Samples
Source: PLoS Comput Biol. 2009 Apr 10;5(4):e1000352. doi: 10.1371/journal.pcbi.1000352 (PMC2661018; doi:10.1371/journal.pcbi.1000352)
Supplement: Table S1 — Comparison of COG composition between mature and infant microbiomes. The relative abundance of each COG is presented together with significance values (likelihood that difference in abundance is due to chance alone)computed using several statistical procedure: metastats (p and q values), student's t-test, log linear model, and negative binomial model. (0.95 MB XLS) [file pcbi.1000352.s001.xls]

## Sheet: TableS1
Differential abundance analysis of mature and infant human gut microbiomes (data from Kurokawa et al.)
COG id	Description	mature mean	mature stderr	infant mean	infant stderr	metastats	standard t	Log-t	NB	Metastat qvalue
COG0001	Glutamate-1-semialdehyde aminotransferase	0.000183351	3.79207e-05	0.000303148	0.000126509	0.462119	0.249392	0.234468	0.194729	1
COG0002	Acetylglutamate semialdehyde dehydrogenase	0.00054739	4.14203e-05	0.000397319	7.50005e-05	0.115329	0.0846553	0.0625054	0.624167	1
COG0003	Oxyanion-translocating ATPase	5.94264e-05	1.72139e-05	9.40183e-05	4.04928e-05	0.525628	0.366049	0.374993	0.242713	1
COG0005	Purine nucleoside phosphorylase	0.000414157	3.60376e-05	0.000289205	8.67666e-05	0.242885	0.136054	0.160232	0.932195	1
COG0006	Xaa-Pro aminopeptidase	0.001394	5.96845e-05	0.000943174	8.55166e-05	0.0017711	0.00138691	0.00143096	0.892972	0.0675149
COG0007	Uroporphyrinogen-III methylase	0.000119822	3.09266e-05	0.000196741	7.52594e-05	0.443518	0.275456	0.28679	0.308987	1
COG0008	Glutamyl- and glutaminyl-tRNA synthetases	0.00152715	0.000119019	0.000965908	5.30134e-05	0.00180738	0.0117039	0.0041569	0.834187	0.0683489
COG0009	Putative translation factor (SUA5)	0.000733337	4.92248e-05	0.000556117	3.08591e-05	0.0123944	0.0444155	0.0337703	0.952842	0.250313
COG0010	Arginase/agmatinase/formimionoglutamate hydrolase, arginase family	0.000398511	4.13797e-05	0.000304144	0.000131638	0.583521	0.384873	0.437496	0.941417	1
COG0012	Predicted GTPase, probable translation factor	0.000606452	5.04659e-05	0.000409032	6.23981e-05	0.033054	0.0441902	0.0386053	0.868551	0.479132
COG0013	Alanyl-tRNA synthetase	0.000931243	9.34304e-05	0.000467924	8.7156e-05	0.00495711	0.0117741	0.00439372	0.600422	0.132543
COG0014	Gamma-glutamyl phosphate reductase	0.000665027	5.66245e-05	0.000504922	5.24724e-05	0.0636146	0.113378	0.107461	0.94268	0.716283
COG0015	Adenylosuccinate lyase	0.000724937	4.24356e-05	0.000486754	8.48039e-05	0.0300922	0.0164071	0.01759	0.831251	0.454831
COG0016	Phenylalanyl-tRNA synthetase alpha subunit	0.000682882	7.04342e-05	0.000310182	4.00557e-05	0.00121701	0.0064475	0.00136349	0.488287	0.0555377
COG0017	Aspartyl/asparaginyl-tRNA synthetases	0.000716637	5.63705e-05	0.000285663	8.31903e-05	0.00183707	0.00134404	0.00152125	0.399687	0.0691958
COG0018	Arginyl-tRNA synthetase	0.000841204	7.30542e-05	0.000549035	0.000173874	0.162153	0.0889594	0.0906299	0.781398	1
COG0019	Diaminopimelate decarboxylase	0.00115289	6.5848e-05	0.000617805	7.61103e-05	0.000504616	0.000571354	0.000258869	0.592136	0.0366394
COG0020	Undecaprenyl pyrophosphate synthase	0.000389004	2.56882e-05	0.00043501	3.33686e-05	0.337426	0.325511	0.387609	0.636928	1
COG0021	Transketolase	0.000355295	3.70098e-05	0.000631229	0.000318015	0.485018	0.210607	0.131231	0.249259	1
COG0022	Pyruvate/2-oxoglutarate dehydrogenase complex, dehydrogenase (E1) component, eukaryotic type, beta subunit	7.40483e-05	1.7787e-05	8.34879e-05	3.28439e-05	0.841481	0.787931	0.737139	0.648231	1
COG0024	Methionine aminopeptidase	0.000828351	7.51486e-05	0.000644143	4.48929e-05	0.0606429	0.149655	0.117247	0.933757	0.696507
COG0025	NhaP-type Na+/H+ and K+/H+ antiporters	0.000184955	5.2345e-05	0.000462899	9.74118e-05	0.0299768	0.0188873	0.0688354	0.0900607	0.454159
COG0026	Phosphoribosylaminoimidazole carboxylase (NCAIR synthetase)	7.92753e-05	2.66806e-05	0.000602662	0.000339359	0.164904	0.0344367	0.007674	0.0006172	1
COG0027	Formate-dependent phosphoribosylglycinamide formyltransferase (GAR transformylase)	0.000233491	3.28375e-05	0.000315745	0.000140357	0.650512	0.435055	0.444913	0.452359	1
COG0028	Thiamine pyrophosphate-requiring enzymes [acetolactate synthase, pyruvate dehydrogenase (cytochrome), glyoxylate carboligase, phosphonopyruvate decarboxylase]	0.00103089	7.06487e-05	0.001577	0.000300001	0.111507	0.0288692	0.0234123	0.343216	1
COG0029	Aspartate oxidase	0.000411924	4.64221e-05	0.000234502	1.65679e-05	0.00520777	0.0316799	0.0127079	0.5946	0.137311
COG0030	Dimethyladenosine transferase (rRNA methylation)	0.000733155	4.46706e-05	0.00104145	0.000703134	0.72945	0.504323	0.433389	0.404532	1
COG0031	Cysteine synthase	0.000698115	3.37811e-05	0.000949048	0.000206981	0.29432	0.100388	0.0660554	0.444574	1
COG0033	Phosphoglucomutase	5.04673e-05	1.25226e-05	0.000381355	5.7432e-05	0.000359497	5.8248e-06	0.00017822	0.000367024	0.034918
COG0034	Glutamine phosphoribosylpyrophosphate amidotransferase	0.000976991	6.02408e-05	0.000908022	0.000437176	0.901287	0.816141	0.823967	0.873193	1
COG0035	Uracil phosphoribosyltransferase	0.000585857	5.55684e-05	0.000556214	0.00020486	0.91254	0.851225	0.810725	0.842834	1
COG0036	Pentose-5-phosphate-3-epimerase	0.000686032	4.53565e-05	0.000939818	0.000105052	0.0501483	0.0228103	0.0319721	0.435293	0.6142
COG0037	Predicted ATPase of the PP-loop superfamily implicated in cell cycle control	0.00127552	8.45812e-05	0.000497306	5.28886e-05	2.96833e-05	0.000119531	1.6154e-05	0.248289	0.0108366
COG0038	Chloride channel protein EriC	0.000749183	4.53567e-05	0.00114897	0.000156031	0.0329814	0.00676597	0.00545036	0.328132	0.479132
COG0039	Malate/lactate dehydrogenases	0.000676295	3.91631e-05	0.000782321	0.000126217	0.516746	0.309456	0.351117	0.613523	1
COG0040	ATP phosphoribosyltransferase	0.000483958	5.65211e-05	0.000326316	6.82906e-05	0.110059	0.132019	0.104846	0.69887	1
COG0041	Phosphoribosylcarboxyaminoimidazole (NCAIR) mutase	0.000451615	2.81645e-05	0.00055335	0.000114046	0.482967	0.249407	0.282793	0.551783	1
COG0042	tRNA-dihydrouridine synthase	0.000926614	8.53726e-05	0.000682544	9.95225e-05	0.0953361	0.121283	0.0992947	0.801142	0.951552
COG0044	Dihydroorotase and related cyclic amidohydrolases	0.000900176	4.84172e-05	0.000797408	0.000132124	0.557135	0.376197	0.37509	0.959685	1
COG0045	Succinyl-CoA synthetase, beta subunit	9.14469e-05	2.11796e-05	0.000323529	4.60172e-05	0.0012368	0.000240301	0.00485871	0.0119208	0.0561707
COG0046	Phosphoribosylformylglycinamidine (FGAM) synthase, synthetase domain	0.00048527	2.8335e-05	0.000435381	9.2423e-05	0.682696	0.505883	0.42287	0.932693	1
COG0047	Phosphoribosylformylglycinamidine (FGAM) synthase, glutamine amidotransferase domain	0.000482599	2.46393e-05	0.000389449	6.37297e-05	0.231065	0.118965	0.091351	0.889413	1
COG0049	Ribosomal protein S7	0.000415976	3.78457e-05	0.000286874	7.18854e-05	0.152064	0.107313	0.0814031	0.701053	1
COG0050	GTPases - translation elongation factors	0.000579948	5.53365e-05	0.000439242	5.64886e-05	0.109851	0.15508	0.115688	0.797529	1
COG0051	Ribosomal protein S10	0.000361417	3.6731e-05	0.000508189	0.000203272	0.568283	0.315375	0.271604	0.393559	1
COG0053	Predicted Co/Zn/Cd cation transporters	0.000582113	6.64118e-05	0.000366666	6.61776e-05	0.0436146	0.0765205	0.0575371	0.572564	0.570619
COG0055	F0F1-type ATP synthase, beta subunit	0.000870077	3.44945e-05	0.00108277	0.000625198	0.787761	0.60186	0.559666	0.526937	1
COG0056	F0F1-type ATP synthase, alpha subunit	0.000847841	9.22219e-05	0.00113882	0.000556236	0.682699	0.456264	0.413713	0.435293	1
COG0057	Glyceraldehyde-3-phosphate dehydrogenase/erythrose-4-phosphate dehydrogenase	0.000603898	7.34689e-05	0.00114682	0.000209701	0.0340962	0.00957273	0.0135275	0.146165	0.488881
COG0058	Glucan phosphorylase	0.00126115	4.86072e-05	0.00069122	0.000131401	0.00250989	0.000332969	0.000801957	0.403579	0.0847819
COG0059	Ketol-acid reductoisomerase	0.000605523	5.11528e-05	0.000747843	0.0003292	0.735252	0.532931	0.525722	0.532886	1
COG0060	Isoleucyl-tRNA synthetase	0.000839257	2.55966e-05	0.000791558	0.000185205	0.840109	0.704941	0.600536	0.912136	1
COG0061	Predicted sugar kinase	0.000560112	4.02971e-05	0.000379724	9.85778e-05	0.128308	0.0638409	0.0688852	0.613035	1
COG0062	Uncharacterized conserved protein	0.000306901	3.33145e-05	0.000201474	4.18831e-05	0.0768566	0.0942535	0.0859756	0.576265	0.816155
COG0063	Predicted sugar kinase	0.000316463	3.51196e-05	0.000218587	4.57311e-05	0.127364	0.137763	0.130463	0.64579	1
COG0064	Asp-tRNAAsn/Glu-tRNAGln amidotransferase B subunit (PET112 homolog)	0.000351983	5.41423e-05	0.000447294	0.00014675	0.627696	0.45881	0.482559	0.493746	1
COG0066	3-isopropylmalate dehydratase small subunit	0.000564513	4.62524e-05	0.000528325	5.10959e-05	0.677201	0.651761	0.58055	0.921019	1
COG0067	Glutamate synthase domain 1	0.000299492	3.03452e-05	0.000402532	0.000179203	0.652508	0.415468	0.371317	0.423946	1
COG0068	Hydrogenase maturation factor	0.00014696	3.32677e-05	0.000187275	5.87983e-05	0.635097	0.53577	0.553901	0.488037	1
COG0069	Glutamate synthase domain 2	0.000300655	2.84587e-05	0.000411088	0.000187723	0.644147	0.398378	0.347246	0.396671	1
COG0070	Glutamate synthase domain 3	0.000279402	2.12044e-05	0.000405955	0.00018261	0.580846	0.310981	0.24304	0.331113	1
COG0071	Molecular chaperone (small heat shock protein)	0.000685062	5.47263e-05	0.000412859	9.68346e-05	0.0338719	0.0237199	0.0264981	0.429241	0.4864
COG0072	Phenylalanyl-tRNA synthetase beta subunit	0.000408938	2.1345e-05	0.000379002	8.74438e-05	0.791884	0.648824	0.587354	0.933295	1
COG0073	EMAP domain	0.000885971	3.78436e-05	0.000661716	0.000120716	0.111256	0.0386564	0.0549059	0.686334	1
COG0074	Succinyl-CoA synthetase, alpha subunit	0.000133816	3.53598e-05	0.000496943	0.000103368	0.00791224	0.00127697	0.00972656	0.00223464	0.184527
COG0075	Serine-pyruvate aminotransferase/archaeal aspartate aminotransferase	0.000280489	4.04133e-05	0.000220894	5.39324e-05	0.47328	0.41757	0.436202	0.762063	1
COG0076	Glutamate decarboxylase and related PLP-dependent proteins	0.000216499	3.78558e-05	0.000266471	3.7885e-05	0.450058	0.443509	0.459064	0.52939	1
COG0077	Prephenate dehydratase	0.000416993	3.87903e-05	0.000375579	8.3422e-05	0.721996	0.612125	0.572155	0.812901	1
COG0078	Ornithine carbamoyltransferase	0.000833787	0.000120954	0.000834737	0.000167555	0.996811	0.99653	0.983562	0.709905	1
COG0079	Histidinol-phosphate/aromatic aminotransferase and cobyric acid decarboxylase	0.00108161	9.52454e-05	0.000787058	9.30232e-05	0.0506858	0.0885392	0.0644268	0.985684	0.617298
COG0083	Homoserine kinase	0.000105219	2.73546e-05	0.000369033	4.76205e-05	0.000857517	0.000337021	0.00977125	0.0450309	0.0434618
COG0084	Mg-dependent DNase	0.000802364	3.94338e-05	0.000552063	0.00012408	0.0850327	0.0276701	0.0441215	0.894997	0.870686
COG0085	DNA-directed RNA polymerase, beta subunit/140 kD subunit	0.00103295	7.78362e-05	0.00115983	0.000525984	0.850287	0.724687	0.709388	0.614443	1
COG0086	DNA-directed RNA polymerase, beta' subunit/160 kD subunit	0.00103078	7.07038e-05	0.001108	0.000460666	0.895726	0.807218	0.80243	0.65489	1
COG0089	Ribosomal protein L23	0.000465796	5.42612e-05	0.000511166	0.000167179	0.838285	0.741394	0.7377	0.633003	1
COG0090	Ribosomal protein L2	0.000513311	3.86685e-05	0.000704462	0.000258865	0.557135	0.292805	0.245054	0.441754	1
COG0092	Ribosomal protein S3	0.000585607	4.71771e-05	0.000394421	5.37007e-05	0.0230573	0.0358336	0.0207572	0.858177	0.385116
COG0094	Ribosomal protein L5	0.000488675	4.33853e-05	0.000405283	9.07755e-05	0.502719	0.362209	0.313711	0.93283	1
COG0095	Lipoate-protein ligase A	0.00018033	3.586e-05	0.000375464	8.10815e-05	0.0516456	0.0246593	0.0512	0.176293	0.625278
COG0097	Ribosomal protein L6P/L9E	0.000495877	4.26116e-05	0.000356694	4.98993e-05	0.0588191	0.0815971	0.0715604	0.900641	0.680339
COG0098	Ribosomal protein S5	0.000519473	5.10489e-05	0.000450525	0.000112433	0.657617	0.527007	0.479663	0.888223	1
COG0099	Ribosomal protein S13	0.000399115	2.45958e-05	0.000260463	6.38798e-05	0.0690037	0.0286901	0.0267471	0.792397	0.756509
COG0100	Ribosomal protein S11	0.000409894	2.65204e-05	0.000309281	5.76332e-05	0.152813	0.0919704	0.0645357	0.94995	1
COG0101	Pseudouridylate synthase	0.000657494	2.45321e-05	0.000505532	0.000206355	0.556657	0.283932	0.301016	0.92996	1
COG0106	Phosphoribosylformimino-5-aminoimidazole carboxamide ribonucleotide (ProFAR) isomerase	0.000417835	4.41264e-05	0.000356891	5.17944e-05	0.467769	0.435037	0.401938	0.911443	1
COG0107	Imidazoleglycerol-phosphate synthase	0.000581208	5.45866e-05	0.00036697	5.58212e-05	0.0204947	0.038098	0.0260144	0.736186	0.358547
COG0109	Polyprenyltransferase (cytochrome oxidase assembly factor)	4.41933e-06	4.41933e-06	0.000113036	6.95801e-05	0.160059	0.0318168	0.0536284	5.37712e-06	1
COG0110	Acetyltransferase (isoleucine patch superfamily)	0.00159107	0.000135628	0.00155286	8.6452e-05	0.851079	0.862467	0.855624	0.797428	1
COG0111	Phosphoglycerate dehydrogenase and related dehydrogenases	0.00139253	9.8772e-05	0.00140433	0.00013618	0.955719	0.947221	0.935047	0.757671	1
COG0112	Glycine/serine hydroxymethyltransferase	0.00062876	3.95891e-05	0.000430923	8.33646e-05	0.0566984	0.0314079	0.0413648	0.802467	0.664417
COG0114	Fumarase	0.000149668	3.43791e-05	0.000173452	7.31686e-05	0.815802	0.740494	0.718337	0.610786	1
COG0115	Branched-chain amino acid aminotransferase/4-amino-4-deoxychorismate lyase	0.000767792	6.08932e-05	0.000630642	8.8477e-05	0.263383	0.233744	0.216616	0.987496	1
COG0116	Predicted N6-adenine-specific DNA methylase	0.000510676	4.57286e-05	0.000129977	7.9304e-05	0.00218997	0.00102932	0.00578427	0.115973	0.0787388
COG0117	Pyrimidine deaminase	0.000218442	2.17303e-05	0.000165744	4.20851e-05	0.328693	0.241718	0.295056	0.898536	1
COG0118	Glutamine amidotransferase	0.000456461	2.93909e-05	0.000338834	2.48137e-05	0.0122295	0.0316167	0.0391862	0.874369	0.248569
COG0119	Isopropylmalate/homocitrate/citramalate synthases	0.00111153	5.96605e-05	0.000676879	0.000126084	0.0112829	0.00425902	0.00584633	0.625375	0.236418
COG0120	Ribose 5-phosphate isomerase	0.000150293	3.45794e-05	0.000331039	3.56999e-05	0.00488125	0.00952747	0.0484182	0.118292	0.131627
COG0121	Predicted glutamine amidotransferase	5.3181e-05	1.43394e-05	0.000270321	9.5887e-05	0.0482617	0.0060579	0.00475749	0.0030982	0.599605
COG0122	3-methyladenine DNA glycosylase/8-oxoguanine DNA glycosylase	0.000236187	2.88568e-05	0.000160443	7.48065e-05	0.443864	0.265739	0.31227	0.761384	1
COG0124	Histidyl-tRNA synthetase	0.000618012	4.29834e-05	0.000350454	3.04244e-05	0.000646436	0.00252102	0.00129457	0.526507	0.0390824
COG0125	Thymidylate kinase	0.000317979	6.65387e-05	0.000376585	7.15522e-05	0.633319	0.61029	0.64905	0.597761	1
COG0127	Xanthosine triphosphate pyrophosphatase	0.000522561	5.30174e-05	0.000474905	9.12853e-05	0.721271	0.64179	0.62451	0.919113	1
COG0128	5-enolpyruvylshikimate-3-phosphate synthase	0.000605497	5.86588e-05	0.000795329	0.000252088	0.555404	0.319612	0.304048	0.475492	1
COG0130	Pseudouridine synthase	0.000464264	6.02787e-05	0.000385943	3.39617e-05	0.32084	0.427649	0.390372	0.951965	1
COG0132	Dethiobiotin synthetase	0.000164624	3.77115e-05	0.00022278	9.47484e-05	0.650677	0.49833	0.486173	0.432481	1
COG0133	Tryptophan synthase beta chain	0.000516699	2.96919e-05	0.000427594	9.59771e-05	0.471852	0.2633	0.311039	0.930868	1
COG0134	Indole-3-glycerol phosphate synthase	0.000340653	3.41871e-05	0.000267952	4.14628e-05	0.23434	0.240928	0.206935	0.881026	1
COG0135	Phosphoribosylanthranilate isomerase	0.000357555	3.15225e-05	0.000273236	3.91252e-05	0.132166	0.148941	0.163107	0.835209	1
COG0136	Aspartate-semialdehyde dehydrogenase	0.000613326	6.42243e-05	0.000744276	0.000129181	0.461819	0.327402	0.365519	0.557527	1
COG0137	Argininosuccinate synthase	0.000502172	5.00786e-05	0.00022045	1.70572e-05	0.000501318	0.00399651	0.000693202	0.268673	0.0366394
COG0140	Phosphoribosyl-ATP pyrophosphohydrolase	0.00040353	2.03577e-05	0.000326012	3.15698e-05	0.0646667	0.0603647	0.0423228	0.881886	0.722133
COG0142	Geranylgeranyl pyrophosphate synthase	0.000782991	5.16694e-05	0.00061374	9.67933e-05	0.163611	0.118664	0.0944623	0.840916	1
COG0143	Methionyl-tRNA synthetase	0.000542293	3.53451e-05	0.0004822	0.000155696	0.765868	0.601672	0.617908	0.948574	1
COG0144	tRNA and rRNA cytosine-C5-methylases	0.00070503	7.71274e-05	0.00045642	0.000120788	0.119225	0.10502	0.100104	0.597738	1
COG0145	N-methylhydantoinase A/acetone carboxylase, beta subunit	8.12552e-05	3.0597e-05	0.000218738	9.7601e-05	0.237555	0.102675	0.153981	0.0418693	1
COG0147	Anthranilate/para-aminobenzoate synthases component I	0.000628545	4.15883e-05	0.000634417	9.37008e-05	0.963806	0.947321	0.865938	0.803582	1
COG0148	Enolase	0.000739244	3.47688e-05	0.000415188	7.88586e-05	0.00404682	0.000981508	0.00177386	0.418723	0.113983
COG0149	Triosephosphate isomerase	0.00063166	4.05751e-05	0.000368573	4.09482e-05	0.00127638	0.00247893	0.00114552	0.457628	0.0566138
COG0150	Phosphoribosylaminoimidazole (AIR) synthetase	0.000631888	1.87833e-05	0.000621367	0.000133059	0.950775	0.907369	0.839513	0.850978	1
COG0151	Phosphoribosylamine-glycine ligase	0.000676784	5.71782e-05	0.000533795	9.47336e-05	0.256915	0.204968	0.163988	0.813061	1
COG0153	Galactokinase	0.000623439	3.10425e-05	0.000417685	5.86972e-05	0.0115897	0.00579741	0.00393201	0.592559	0.241777
COG0155	Sulfite reductase, beta subunit (hemoprotein)	5.07484e-05	1.45254e-05	0.000173077	9.21464e-05	0.249933	0.0741326	0.0438842	0.00933944	1
COG0156	7-keto-8-aminopelargonate synthetase and related enzymes	0.000519258	7.98933e-05	0.000362652	0.000122786	0.347651	0.303247	0.300299	0.650703	1
COG0157	Nicotinate-nucleotide pyrophosphorylase	0.000369944	3.08526e-05	0.000363283	6.55158e-05	0.942048	0.9174	0.890501	0.867432	1
COG0158	Fructose-1,6-bisphosphatase	3.17917e-05	9.7572e-06	0.000138266	8.09862e-05	0.252064	0.0697172	0.0281377	0.00193969	1
COG0159	Tryptophan synthase alpha chain	0.000443383	4.83616e-05	0.000436782	8.55907e-05	0.957513	0.943922	0.928435	0.852606	1
COG0160	4-aminobutyrate aminotransferase and related aminotransferases	8.70474e-05	2.24538e-05	0.000449965	0.000234929	0.164716	0.0354543	0.00831455	0.00030145	1
COG0161	Adenosylmethionine-8-amino-7-oxononanoate aminotransferase	0.000167153	3.20862e-05	0.000223258	8.22542e-05	0.612115	0.448624	0.412163	0.412604	1
COG0162	Tyrosyl-tRNA synthetase	0.000645935	3.16286e-05	0.00039717	7.64482e-05	0.013186	0.00387799	0.00302487	0.44022	0.261361
COG0163	3-polyprenyl-4-hydroxybenzoate decarboxylase	7.20974e-05	3.11164e-05	0.000208377	0.000130189	0.369695	0.177915	0.192175	0.015384	1
COG0164	Ribonuclease HII	0.000531743	3.66249e-05	0.000270831	3.33709e-05	0.000521106	0.00116901	0.000639679	0.266582	0.0366394
COG0165	Argininosuccinate lyase	0.000670477	4.46348e-05	0.000394421	0.000137242	0.0866488	0.0291622	0.0414617	0.370158	0.879643
COG0166	Glucose-6-phosphate isomerase	0.000741434	7.00458e-05	0.000579916	0.000111483	0.282667	0.23455	0.195909	0.744319	1
COG0167	Dihydroorotate dehydrogenase	0.000851004	6.91369e-05	0.000942023	0.000332018	0.831732	0.70464	0.723924	0.685628	1
COG0168	Trk-type K+ transport systems, membrane components	0.00137907	7.00265e-05	0.0006062	0.000198085	0.00454814	0.000650792	0.00312335	0.146754	0.125862
COG0169	Shikimate 5-dehydrogenase	0.000572676	6.30495e-05	0.000700584	0.000158961	0.546505	0.377556	0.36466	0.535768	1
COG0170	Dolichol kinase	0	0	0	0	1	NaN	0.999996	1	1
COG0171	NAD synthase	0.000370446	2.15892e-05	0.000371625	2.81929e-05	0.978951	0.975554	0.853445	0.714915	1
COG0172	Seryl-tRNA synthetase	0.000681108	4.38628e-05	0.000376763	9.52746e-05	0.0155672	0.0061781	0.00641981	0.721975	0.296119
COG0173	Aspartyl-tRNA synthetase	0.000738285	6.06742e-05	0.000485486	0.000167234	0.210227	0.0992727	0.126075	0.85319	1
COG0175	3'-phosphoadenosine 5'-phosphosulfate sulfotransferase (PAPS reductase)/FAD synthetase and related enzymes	0.00043371	3.61211e-05	0.000304807	0.000139935	0.469619	0.240603	0.303596	0.902688	1
COG0177	Predicted EndoIII-related endonuclease	0.000457726	3.65189e-05	0.000439611	6.68128e-05	0.850865	0.80079	0.7591	0.769997	1
COG0178	Excinuclease ATPase subunit	0.00145616	0.000103921	0.000978461	9.76741e-05	0.0076286	0.01754	0.00991945	0.867897	0.18148
COG0179	2-keto-4-pentenoate hydratase/2-oxohepta-3-ene-1,7-dioic acid hydratase (catechol pathway)	0.000360331	4.67025e-05	0.00041586	0.000121329	0.735407	0.606275	0.616061	0.59661	1
COG0180	Tryptophanyl-tRNA synthetase	0.00056607	5.91745e-05	0.000495189	0.00011095	0.654536	0.548724	0.488181	0.87197	1
COG0182	Predicted translation initiation factor 2B subunit, eIF-2B alpha/beta/delta family	9.99647e-05	2.80237e-05	0.000167307	8.33019e-05	0.53636	0.341586	0.342081	0.291932	1
COG0183	Acetyl-CoA acetyltransferase	0.000280993	2.90909e-05	0.000583405	0.000336609	0.468016	0.188977	0.0879538	0.174314	1
COG0185	Ribosomal protein S19	0.00046652	3.38398e-05	0.000448929	4.98892e-05	0.817303	0.777435	0.774768	0.786522	1
COG0186	Ribosomal protein S17	0.000382159	2.72428e-05	0.000288713	0.000101731	0.471687	0.24662	0.232182	0.918803	1
COG0187	Type IIA topoisomerase (DNA gyrase/topo II, topoisomerase IV), B subunit	0.00170067	8.75035e-05	0.00112086	0.000248981	0.0519919	0.016911	0.0236016	0.798893	0.62723
COG0188	Type IIA topoisomerase (DNA gyrase/topo II, topoisomerase IV), A subunit	0.00169367	6.34888e-05	0.00120383	0.000189191	0.0333211	0.00865712	0.00908454	0.878091	0.480673
COG0189	Glutathione synthase/Ribosomal protein S6 modification enzyme (glutaminyl transferase)	6.0251e-05	2.07456e-05	0.000157555	9.22951e-05	0.364587	0.169193	0.15747	0.0802704	1
COG0190	5,10-methylene-tetrahydrofolate dehydrogenase/Methenyl tetrahydrofolate cyclohydrolase	0.000555117	3.64867e-05	0.000340911	4.9514e-05	0.006217	0.00659024	0.00415099	0.701096	0.156115
COG0191	Fructose/tagatose bisphosphate aldolase	0.000874105	7.80475e-05	0.00131458	0.000210172	0.0777834	0.0311158	0.0321655	0.363487	0.822213
COG0192	S-adenosylmethionine synthetase	0.000798921	3.58532e-05	0.000479278	2.91291e-05	8.90498e-05	0.000185104	0.000167794	0.679853	0.0216733
COG0194	Guanylate kinase	0.00055943	2.98753e-05	0.000652714	0.00015639	0.641462	0.407731	0.418414	0.603163	1
COG0195	Transcription elongation factor	0.000631843	5.91659e-05	0.000470782	0.000105226	0.241269	0.179718	0.15043	0.886862	1
COG0196	FAD synthase	0.000550157	5.01736e-05	0.000728621	0.000321971	0.664358	0.42687	0.387111	0.469329	1
COG0197	Ribosomal protein L16/L10E	0.000499006	3.98593e-05	0.000259014	3.47239e-05	0.00130936	0.00356377	0.00165515	0.521538	0.0576838
COG0198	Ribosomal protein L24	0.000470513	5.14792e-05	0.000271791	7.56278e-05	0.0540697	0.0543362	0.0420561	0.590256	0.642337
COG0199	Ribosomal protein S14	0.000276424	3.21873e-05	0.000419381	0.000130025	0.348234	0.162305	0.158554	0.350933	1
COG0200	Ribosomal protein L15	0.000551296	4.71734e-05	0.000318983	3.01699e-05	0.00221965	0.0101164	0.00376979	0.589872	0.0795049
COG0201	Preprotein translocase subunit SecY	0.000706145	6.85733e-05	0.000539128	7.78777e-05	0.14686	0.178476	0.140154	0.894347	1
COG0202	DNA-directed RNA polymerase, alpha subunit/40 kD subunit	0.000579956	2.42444e-05	0.000503664	0.00010908	0.584213	0.348763	0.333447	0.96616	1
COG0203	Ribosomal protein L17	0.00038304	5.03536e-05	0.000335337	7.08522e-05	0.663487	0.603749	0.545272	0.927182	1
COG0204	1-acyl-sn-glycerol-3-phosphate acyltransferase	0.000888332	4.46887e-05	0.000956757	3.8192e-05	0.306948	0.367233	0.480971	0.696969	1
COG0205	6-phosphofructokinase	0.00171173	0.000108013	0.000558339	0.000158402	0.000244063	9.46559e-05	0.000156648	0.169391	0.0313058
COG0206	Cell division GTPase	0.000434106	4.37996e-05	0.000395054	9.27858e-05	0.763424	0.66941	0.621757	0.90195	1
COG0208	Ribonucleotide reductase, beta subunit	0.000214708	2.82086e-05	0.000675458	5.52557e-05	5.27703e-05	4.60952e-06	0.000151752	0.0248821	0.0156529
COG0209	Ribonucleotide reductase, alpha subunit	0.000521088	4.09048e-05	0.000763882	4.53564e-05	0.00289247	0.0048222	0.0125406	0.365748	0.0940246
COG0210	Superfamily I DNA and RNA helicases	0.00158523	0.000107119	0.00263725	0.000779686	0.239979	0.0663925	0.0362464	0.25949	1
COG0213	Thymidine phosphorylase	0.000229604	3.52812e-05	0.000269258	5.09461e-05	0.609421	0.5417	0.606892	0.605514	1
COG0214	Pyridoxine biosynthesis enzyme	0.000193154	2.49291e-05	0.000174253	8.94669e-05	0.872035	0.786158	0.717677	0.909512	1
COG0215	Cysteinyl-tRNA synthetase	0.000739158	3.8879e-05	0.00054102	6.37024e-05	0.0237994	0.0187134	0.0139407	0.77949	0.391512
COG0216	Protein chain release factor A	0.000622416	5.00422e-05	0.000374171	2.41667e-05	0.00146438	0.00898691	0.00375614	0.556042	0.061518
COG0218	Predicted GTPase	0.00044182	4.04636e-05	0.000263314	8.10892e-05	0.0768797	0.0482913	0.0563945	0.522608	0.816155
COG0219	Predicted rRNA methylase (SpoU class)	0.000368152	4.47257e-05	0.000852313	0.00045187	0.348848	0.125316	0.0501745	0.0744865	1
COG0220	Predicted S-adenosylmethionine-dependent methyltransferase	0.000447141	3.33821e-05	0.000397929	0.000103282	0.719968	0.563754	0.579563	0.97625	1
COG0221	Inorganic pyrophosphatase	0.000144139	3.70536e-05	0.000346242	4.33238e-05	0.00571238	0.0084291	0.0510698	0.0665102	0.147341
COG0222	Ribosomal protein L7/L12	0.000401848	4.77886e-05	0.000371286	7.6542e-05	0.788309	0.734293	0.728063	0.911707	1
COG0223	Methionyl-tRNA formyltransferase	0.000586175	3.74169e-05	0.000448787	3.66821e-05	0.0249603	0.0485932	0.0536	0.80724	0.402929
COG0224	F0F1-type ATP synthase, gamma subunit	0.000757208	3.69765e-05	0.00099388	0.000523458	0.721511	0.492592	0.436116	0.462131	1
COG0226	ABC-type phosphate transport system, periplasmic component	0.000669634	4.33317e-05	0.000610029	0.000119842	0.711231	0.565032	0.505628	0.955855	1
COG0227	Ribosomal protein L28	0.000139296	2.86805e-05	0.000351633	0.00015015	0.22181	0.066014	0.049734	0.0427835	1
COG0230	Ribosomal protein L34	7.96347e-05	2.46208e-05	0	0	0.00910287	0.059207	0.996345	8.19127e-06	0.203304
COG0231	Translation elongation factor P (EF-P)/translation initiation factor 5A (eIF-5A)	0.000430596	4.00221e-05	0.000391213	4.52277e-05	0.602261	0.572838	0.597708	0.970305	1
COG0232	dGTP triphosphohydrolase	0.000602683	3.47387e-05	0.000469281	5.81404e-05	0.0768863	0.0636055	0.0853024	0.804889	0.816155
COG0234	Co-chaperonin GroES (HSP10)	0.00031566	2.90664e-05	0.00023882	5.64411e-05	0.288944	0.204928	0.157943	0.741715	1
COG0235	Ribulose-5-phosphate 4-epimerase and related epimerases and aldolases	0.000840162	5.93315e-05	0.00143983	0.000241556	0.0361542	0.00604351	0.00379047	0.194738	0.506904
COG0236	Acyl carrier protein	0.00052563	6.80073e-05	0.000209412	3.67933e-05	0.00242743	0.0131334	0.00294454	0.150892	0.0828816
COG0237	Dephospho-CoA kinase	0.000476692	4.78652e-05	0.000338968	6.45663e-05	0.12433	0.129388	0.0912294	0.662952	1
COG0239	Integral membrane protein possibly involved in chromosome condensation	0.000187848	3.04274e-05	0.000420252	0.00015389	0.187232	0.0531902	0.0391202	0.0619842	1
COG0240	Glycerol-3-phosphate dehydrogenase	0.000561617	5.87656e-05	0.000383391	8.35376e-05	0.117345	0.116013	0.0958518	0.582082	1
COG0241	Histidinol phosphatase and related phosphatases	0.000283263	4.03934e-05	0.000193193	0.00010043	0.501008	0.330597	0.367653	0.599905	1
COG0243	Anaerobic dehydrogenases, typically selenocysteine-containing	0.00048854	9.17396e-05	0.00193912	0.000983832	0.192282	0.0427666	0.00824702	0.0016961	1
COG0244	Ribosomal protein L10	0.000316304	4.18797e-05	0.000291063	4.53799e-05	0.746564	0.726742	0.677444	0.939531	1
COG0247	Fe-S oxidoreductase	0.00042664	5.44314e-05	0.000503156	0.000194041	0.763929	0.614846	0.579368	0.577805	1
COG0248	Exopolyphosphatase	0.000432264	4.60199e-05	0.000697522	0.000104646	0.0420249	0.0189688	0.0284891	0.22165	0.555569
COG0249	Mismatch repair ATPase (MutS family)	0.00160064	5.12266e-05	0.000526848	6.39994e-05	6.59628e-06	1.02741e-07	8.69772e-08	0.0547492	0.00722442
COG0250	Transcription antiterminator	0.000775182	5.11294e-05	0.000420095	7.49088e-05	0.00318601	0.00257786	0.00183486	0.285393	0.0983897
COG0251	Putative translation initiation inhibitor, yjgF family	0.000787793	4.00258e-05	0.000883307	0.000335423	0.823127	0.671644	0.645589	0.662141	1
COG0253	Diaminopimelate epimerase	0.000623735	7.87886e-05	0.000513263	6.03031e-05	0.328422	0.402623	0.354824	0.816207	1
COG0254	Ribosomal protein L31	0.000299208	3.18996e-05	0.000297661	5.77334e-05	0.984918	0.980217	0.9972	0.848519	1
COG0256	Ribosomal protein L18	0.000430406	4.15713e-05	0.000387442	9.51139e-05	0.743497	0.632895	0.577008	0.825533	1
COG0257	Ribosomal protein L36	1.06064e-05	1.06064e-05	3.73144e-05	3.73144e-05	0.580727	0.369425	0.470249	0.0711313	1
COG0258	5'-3' exonuclease (including N-terminal domain of PolI)	0.00048963	3.04496e-05	0.00041421	2.49737e-05	0.086131	0.154815	0.124497	0.871865	0.878143
COG0259	Pyridoxamine-phosphate oxidase	7.50517e-05	1.53577e-05	7.34778e-05	4.48124e-05	0.978945	0.966582	0.979229	0.741135	1
COG0262	Dihydrofolate reductase	0.000577305	7.76943e-05	0.000467298	4.30448e-05	0.278195	0.388282	0.363486	0.92853	1
COG0263	Glutamate 5-kinase	0.000545275	3.38504e-05	0.00038723	2.62567e-05	0.00448547	0.0145701	0.012397	0.919566	0.124491
COG0265	Trypsin-like serine proteases, typically periplasmic, contain C-terminal PDZ domain	0.000900289	6.59635e-05	0.000844172	0.000226114	0.850528	0.753701	0.783163	0.799606	1
COG0266	Formamidopyrimidine-DNA glycosylase	0.000132042	2.25476e-05	0.00036196	8.12493e-05	0.0209861	0.00333113	0.00512928	0.0845276	0.363502
COG0267	Ribosomal protein L33	0.000223584	3.23837e-05	0.000361591	0.000188057	0.561004	0.304403	0.248905	0.314982	1
COG0268	Ribosomal protein S20	0.000172889	1.86724e-05	0.000168979	2.56828e-05	0.923018	0.907603	0.751585	0.778223	1
COG0269	3-hexulose-6-phosphate synthase and related proteins	4.46118e-05	1.57444e-05	0.000279582	0.000131086	0.109815	0.019239	0.0112725	0.00326349	1
COG0270	Site-specific DNA methylase	0.00111998	8.36082e-05	0.000459225	0.000167972	0.00588718	0.00217899	0.00530678	0.415159	0.150217
COG0271	Stress-induced morphogen (activity unknown)	0	0	4.78783e-05	2.99487e-05	0.149574	0.0271348	0.994583	7.9765e-07	1
COG0272	NAD-dependent DNA ligase (contains BRCT domain type II)	0.000843526	6.15548e-05	0.0010902	0.000332195	0.55735	0.304407	0.267248	0.49568	1
COG0274	Deoxyribose-phosphate aldolase	0.0004729	4.81581e-05	0.000279534	0.0001096	0.145722	0.0820788	0.104851	0.688515	1
COG0277	FAD/FMN-containing dehydrogenases	0.000352174	7.058e-05	0.00050687	0.000238709	0.62103	0.42082	0.402482	0.399312	1
COG0278	Glutaredoxin-related protein	5.6579e-06	3.75179e-06	8.02583e-05	4.74888e-05	0.157902	0.0318328	0.0229607	8.37634e-05	1
COG0279	Phosphoheptose isomerase	0.000162624	3.31522e-05	0.000141919	8.21283e-05	0.853292	0.780474	0.812491	0.866431	1
COG0280	Phosphotransacetylase	0.000712411	3.37412e-05	0.000576948	4.83783e-05	0.0437268	0.0455941	0.0500439	0.996282	0.570911
COG0281	Malic enzyme	0.000531581	3.91483e-05	0.0004492	0.000113376	0.581954	0.395654	0.433679	0.958203	1
COG0282	Acetate kinase	0.000603622	5.30118e-05	0.000521197	8.93389e-05	0.521628	0.42246	0.454463	0.931322	1
COG0283	Cytidylate kinase	0.000491404	5.17436e-05	0.000214427	4.94674e-05	0.00342017	0.00782557	0.00376166	0.373258	0.10145
COG0284	Orotidine-5'-phosphate decarboxylase	0.000653061	8.0078e-05	0.000868563	0.000388658	0.666782	0.446968	0.420979	0.468146	1
COG0285	Folylpolyglutamate synthase	0.000590154	6.35656e-05	0.000373223	0.000107453	0.11868	0.0949399	0.0913802	0.700422	1
COG0286	Type I restriction-modification system methyltransferase subunit	0.00143391	0.000120459	0.00107394	0.000165679	0.114155	0.118198	0.0949072	0.861585	1
COG0287	Prephenate dehydrogenase	0.000532828	3.48944e-05	0.000384782	9.68344e-05	0.20274	0.0950593	0.0848904	0.822627	1
COG0289	Dihydrodipicolinate reductase	0.000415883	4.4113e-05	0.000438225	7.90775e-05	0.845446	0.795271	0.831124	0.71847	1
COG0290	Translation initiation factor 3 (IF-3)	0.000217109	1.89546e-05	0.000337707	0.000106977	0.329778	0.127667	0.103387	0.32667	1
COG0291	Ribosomal protein L35	0.000106077	2.36812e-05	0.000222726	3.24173e-05	0.015465	0.0173728	0.0607232	0.136854	0.295358
COG0293	23S rRNA methylase	1.67732e-05	8.40401e-06	6.67528e-05	4.40932e-05	0.328406	0.130019	0.131671	0.0135235	1
COG0294	Dihydropteroate synthase and related enzymes	0.000345226	3.78601e-05	0.000266442	2.58672e-05	0.123482	0.218939	0.212283	0.869839	1
COG0295	Cytidine deaminase	0.000345953	2.79933e-05	0.000277941	6.32516e-05	0.425556	0.269992	0.331795	0.9335	1
COG0296	1,4-alpha-glucan branching enzyme	0.00108637	4.83635e-05	0.000853737	0.000217844	0.358455	0.163108	0.196011	0.880194	1
COG0297	Glycogen synthase	0.000760162	4.85095e-05	0.000275008	9.84521e-05	0.00156332	0.000396736	0.0013744	0.190459	0.0636865
COG0298	Hydrogenase maturation factor	8.37701e-05	1.34949e-05	0.000145018	8.41207e-05	0.563405	0.303389	0.215427	0.232609	1
COG0300	Short-chain dehydrogenases of various substrate specificities	0.000443501	3.90213e-05	0.000433319	6.59663e-05	0.916844	0.891432	0.825972	0.832934	1
COG0301	Thiamine biosynthesis ATP pyrophosphatase	0.00035824	5.64416e-05	0.000153147	6.4369e-05	0.0370085	0.0553466	0.0403065	0.264853	0.514029
COG0302	GTP cyclohydrolase I	0.000320235	2.64243e-05	0.000285683	1.20698e-05	0.297186	0.420892	0.453789	0.967593	1
COG0303	Molybdopterin biosynthesis enzyme	0.000382173	5.0708e-05	0.000320794	0.000152842	0.763068	0.629283	0.651778	0.960519	1
COG0304	3-oxoacyl-(acyl-carrier-protein) synthase	0.00077532	6.09404e-05	0.000483137	0.000187602	0.187315	0.0782091	0.115066	0.58544	1
COG0305	Replicative DNA helicase	0.0010342	3.56337e-05	0.000637188	8.13624e-05	0.00145778	0.000252003	0.000385101	0.546011	0.061518
COG0306	Phosphate/sulphate permeases	0.000434022	5.08919e-05	0.000367647	5.55962e-05	0.474975	0.45481	0.415185	0.953512	1
COG0307	Riboflavin synthase alpha chain	0.000349998	3.83563e-05	0.000151836	6.03418e-05	0.0195646	0.0164462	0.0192552	0.25497	0.349072
COG0308	Aminopeptidase N	0.000172175	1.77074e-05	0.00042529	0.000144156	0.117783	0.0214519	0.00674466	0.0566849	1
COG0309	Hydrogenase maturation factor	0.000245968	4.48613e-05	0.000226721	9.57782e-05	0.885353	0.837231	0.868657	0.905622	1
COG0310	ABC-type Co2+ transport system, permease component	7.96046e-05	1.35204e-05	5.74083e-05	3.81687e-05	0.66387	0.498573	0.574252	0.742502	1
COG0311	Predicted glutamine amidotransferase involved in pyridoxine biosynthesis	0.000190758	1.75653e-05	0.000142698	7.96197e-05	0.639536	0.415529	0.3959	0.754811	1
COG0312	Predicted Zn-dependent proteases and their inactivated homologs	0.000268634	3.13918e-05	0.000325712	0.000187923	0.812418	0.662931	0.618099	0.552487	1
COG0313	Predicted methyltransferases	0.000662885	3.3456e-05	0.000513372	8.90101e-05	0.156335	0.0746765	0.0962354	0.795374	1
COG0316	Uncharacterized conserved protein	1.7878e-05	9.47733e-06	0.000241698	0.000124705	0.107975	0.0169303	0.0104376	3.57379e-07	1
COG0317	Guanosine polyphosphate pyrophosphohydrolases/synthetases	0.000903296	5.75628e-05	0.00066842	7.53541e-05	0.032025	0.0391217	0.0345449	0.729762	0.472018
COG0318	Acyl-CoA synthetases (AMP-forming)/AMP-acid ligases II	0.000837623	7.2615e-05	0.000828164	0.000253349	0.977081	0.962041	0.98937	0.8442	1
COG0319	Predicted metal-dependent hydrolase	0.000443344	6.18189e-05	0.000322543	4.03065e-05	0.140643	0.244979	0.188108	0.685519	1
COG0320	Lipoate synthase	0.000183389	3.24318e-05	0.000108497	4.7212e-05	0.251088	0.223106	0.231026	0.452439	1
COG0321	Lipoate-protein ligase B	0.000101701	2.11634e-05	0.000128617	4.93824e-05	0.691742	0.561319	0.511474	0.481341	1
COG0322	Nuclease subunit of the excinuclease complex	0.000641893	3.86126e-05	0.000689414	0.000129625	0.780129	0.646258	0.747578	0.728018	1
COG0323	DNA mismatch repair enzyme (predicted ATPase)	0.000772969	3.72039e-05	0.000366203	4.87718e-05	0.000135224	6.08656e-05	6.53189e-05	0.217893	0.0270089
COG0324	tRNA delta(2)-isopentenylpyrophosphate transferase	0.000834907	3.91021e-05	0.000466402	0.000108856	0.00991751	0.00191796	0.00299841	0.351527	0.218054
COG0325	Predicted enzyme with a TIM-barrel fold	0.000393963	3.24921e-05	0.000577016	0.000116662	0.172935	0.063301	0.0588727	0.318925	1
COG0326	Molecular chaperone, HSP90 family	0.000762929	5.27827e-05	0.000232695	9.40834e-05	0.000755275	0.000258959	0.00102889	0.048028	0.0421009
COG0327	Uncharacterized conserved protein	0.000378007	5.02113e-05	0.000390299	8.01914e-05	0.918569	0.896291	0.94905	0.790579	1
COG0328	Ribonuclease HI	0.00032618	3.05534e-05	0.000247015	1.47112e-05	0.0411575	0.126419	0.101473	0.705758	0.551009
COG0329	Dihydrodipicolinate synthase/N-acetylneuraminate lyase	0.00120392	0.000104705	0.00182306	0.000190651	0.0171207	0.0103458	0.017283	0.275038	0.31555
COG0330	Membrane protease subunits, stomatin/prohibitin homologs	0.00073895	7.05988e-05	0.000790887	8.87978e-05	0.717323	0.67856	0.733799	0.734509	1
COG0331	(acyl-carrier-protein) S-malonyltransferase	0.000592164	4.66991e-05	0.000405437	4.07148e-05	0.0130672	0.0322325	0.0261965	0.914536	0.260575
COG0332	3-oxoacyl-[acyl-carrier-protein] synthase III	0.00095058	7.52074e-05	0.000242636	4.47609e-05	2.63851e-05	9.5969e-05	9.95437e-06	0.251987	0.0108366
COG0333	Ribosomal protein L32	0.000152238	3.05005e-05	0.000147023	3.73508e-05	0.932632	0.922552	0.925681	0.731885	1
COG0334	Glutamate dehydrogenase/leucine dehydrogenase	0.000806323	4.61176e-05	0.000582278	7.95736e-05	0.0345217	0.0254375	0.0309347	0.954152	0.491271
COG0337	3-dehydroquinate synthetase	0.000587573	4.72115e-05	0.000290008	2.5207e-05	0.000389181	0.00206638	0.000488299	0.60545	0.0351549
COG0338	Site-specific DNA methylase	0.000248386	6.59124e-05	0.000280511	9.13044e-05	0.821646	0.787705	0.795949	0.612174	1
COG0339	Zn-dependent oligopeptidases	0.000465241	6.53341e-05	0.000285692	0.000169161	0.422255	0.244909	0.28841	0.79436	1
COG0340	Biotin-(acetyl-CoA carboxylase) ligase	0.000393757	3.57765e-05	0.000334652	7.71668e-05	0.576908	0.437064	0.372543	0.869259	1
COG0341	Preprotein translocase subunit SecF	0.000225818	2.96116e-05	0.000209383	8.8096e-05	0.888454	0.822713	0.878141	0.81436	1
COG0342	Preprotein translocase subunit SecD	0.000539647	4.71215e-05	0.000228692	8.13151e-05	0.00811673	0.00489259	0.006971	0.464493	0.187682
COG0343	Queuine/archaeosine tRNA-ribosyltransferase	0.000542708	6.03131e-05	0.000835577	0.000415487	0.575354	0.312668	0.248812	0.35139	1
COG0344	Predicted membrane protein	0.00032286	3.62019e-05	0.000191615	6.95127e-05	0.132846	0.0904443	0.106565	0.727846	1
COG0345	Pyrroline-5-carboxylate reductase	0.00049526	3.83329e-05	0.0004556	5.31232e-05	0.62983	0.569891	0.477278	0.841106	1
COG0346	Lactoylglutathione lyase and related lyases	0.000802162	7.41571e-05	0.00108302	9.76046e-05	0.0441028	0.0527769	0.0755114	0.455751	0.573454
COG0347	Nitrogen regulatory protein PII	0.000387609	4.34009e-05	0.000384578	3.43879e-05	0.965482	0.966293	0.958571	0.760824	1
COG0348	Polyferredoxin	0.000334553	4.15411e-05	0.000170638	5.95411e-05	0.0468435	0.0487743	0.045059	0.577471	0.590575
COG0349	Ribonuclease D	0.000117064	1.94214e-05	0.000241762	3.20255e-05	0.00785288	0.00529221	0.0209556	0.167165	0.184047
COG0350	Methylated DNA-protein cysteine methyltransferase	0.000546752	3.16508e-05	0.000463131	4.20982e-05	0.152417	0.159176	0.192404	0.925027	1
COG0351	Hydroxymethylpyrimidine/phosphomethylpyrimidine kinase	0.000536173	4.57482e-05	0.000438101	7.53296e-05	0.328666	0.271695	0.270921	0.983096	1
COG0352	Thiamine monophosphate synthase	0.000740554	4.74301e-05	0.000742701	0.000253932	0.994561	0.990446	0.960292	0.75888	1
COG0353	Recombinational DNA repair protein (RecF pathway)	0.000542578	4.06964e-05	0.000697316	0.000329422	0.712303	0.488727	0.470919	0.499944	1
COG0354	Predicted aminomethyltransferase related to GcvT	1.52843e-05	7.70027e-06	0.000170039	5.91171e-05	0.0260718	0.00218323	0.00923137	9.37598e-05	0.412454
COG0357	Predicted S-adenosylmethionine-dependent methyltransferase involved in bacterial cell division	0.000548056	3.14402e-05	0.000380183	6.43643e-05	0.0406661	0.0219958	0.0300679	0.816436	0.548563
COG0358	DNA primase (bacterial type)	0.00243841	9.54181e-05	0.000766183	0.000130873	9.89443e-06	7.8029e-07	1.07497e-06	0.203813	0.00722442
COG0359	Ribosomal protein L9	0.000525183	4.42877e-05	0.000375413	1.77588e-05	0.0107948	0.0527088	0.0365655	0.82833	0.230256
COG0360	Ribosomal protein S6	0.000317378	3.42052e-05	0.000239174	4.28152e-05	0.208429	0.212275	0.190732	0.890375	1
COG0361	Translation initiation factor 1 (IF-1)	0.000324521	3.31196e-05	0.000232828	6.60424e-05	0.277436	0.190094	0.154498	0.831353	1
COG0362	6-phosphogluconate dehydrogenase	0.000226589	3.33562e-05	0.000536338	0.000154789	0.0791191	0.0166805	0.0134852	0.0967903	0.831667
COG0363	6-phosphogluconolactonase/Glucosamine-6-phosphate isomerase/deaminase	0.000749784	6.65304e-05	0.000895105	0.000204249	0.588085	0.394524	0.397264	0.580617	1
COG0365	Acyl-coenzyme A synthetases/AMP-(fatty) acid ligases	0.000239238	2.43126e-05	0.000367587	7.25528e-05	0.132325	0.0519915	0.0487371	0.334975	1
COG0367	Asparagine synthase (glutamine-hydrolyzing)	0.000776308	4.75843e-05	0.000279588	7.88424e-05	0.000448547	0.000154678	0.000361529	0.221558	0.0351549
COG0368	Cobalamin-5-phosphate synthase	0.000267048	4.35269e-05	6.7648e-05	2.52484e-05	0.00292545	0.014457	0.00280873	0.10384	0.0947722
COG0369	Sulfite reductase, alpha subunit (flavoprotein)	4.41933e-06	4.41933e-06	9.36532e-05	6.30138e-05	0.213426	0.0480585	0.0686592	2.49666e-06	1
COG0370	Fe2+ transport system protein B	0.00132532	0.000112745	0.000641148	9.53265e-05	0.00111807	0.00331743	0.00106406	0.385637	0.05333
COG0371	Glycerol dehydrogenase and related enzymes	0.000323233	5.93442e-05	0.000638669	0.000116137	0.0356595	0.0206154	0.0467185	0.15689	0.502937
COG0372	Citrate synthase	0.000746076	3.84846e-05	0.000552142	9.20607e-05	0.081098	0.0388271	0.0292455	0.81933	0.842208
COG0373	Glutamyl-tRNA reductase	0.000105528	1.85263e-05	0.000115615	4.00639e-05	0.856636	0.79555	0.699751	0.65478	1
COG0374	Ni,Fe-hydrogenase I large subunit	8.19415e-05	1.5487e-05	0.000146252	9.14436e-05	0.577798	0.322898	0.238651	0.210741	1
COG0376	Catalase (peroxidase I)	1.82565e-05	1.005e-05	0.00014917	0.000119749	0.338884	0.116023	0.0521149	0.000165995	1
COG0377	NADH:ubiquinone oxidoreductase 20 kD subunit and related Fe-S oxidoreductases	0.000121291	1.68324e-05	0.000157701	1.01369e-05	0.0965861	0.199135	0.244612	0.490912	0.956984
COG0378	Ni2+-binding GTPase involved in regulation of expression and maturation of urease and hydrogenase	0.000139359	1.74012e-05	0.000253028	0.000118819	0.442884	0.179194	0.111842	0.192706	1
COG0380	Trehalose-6-phosphate synthase	3.23881e-05	1.03607e-05	0.000119134	4.28783e-05	0.0775162	0.0181028	0.0284359	0.0118895	0.821183
COG0381	UDP-N-acetylglucosamine 2-epimerase	0.000756659	5.70211e-05	0.000273373	0.000106346	0.00273416	0.00108787	0.00281247	0.164221	0.0904269
COG0382	4-hydroxybenzoate polyprenyltransferase and related prenyltransferases	5.62996e-05	2.83476e-05	0.00010464	7.1678e-05	0.617524	0.456513	0.493363	0.193333	1
COG0383	Alpha-mannosidase	0.000457414	8.17806e-05	0.000815781	0.00029484	0.30428	0.137502	0.136833	0.190819	1
COG0384	Predicted epimerase, PhzC/PhzF homolog	8.58643e-05	2.1487e-05	0.000236274	0.000157496	0.443066	0.176853	0.0977395	0.0329746	1
COG0385	Predicted Na+-dependent transporter	0.000445123	6.02761e-05	0.000364924	5.86289e-05	0.439646	0.438236	0.411105	0.904236	1
COG0386	Glutathione peroxidase	8.29009e-05	1.78173e-05	0.000268457	0.000102322	0.108469	0.0222806	0.0144729	0.0153398	1
COG0387	Ca2+/H+ antiporter	1.26862e-05	1.05502e-05	0.00010619	7.31155e-05	0.268376	0.0810051	0.136562	8.12957e-05	1
COG0388	Predicted amidohydrolase	0.001153	7.43005e-05	0.000792016	9.58311e-05	0.0138654	0.0173918	0.0117252	0.646171	0.272328
COG0389	Nucleotidyltransferase/DNA polymerase involved in DNA repair	0.00104558	6.79828e-05	0.0011939	5.96609e-05	0.140131	0.208558	0.254269	0.636651	1
COG0390	ABC-type uncharacterized transport system, permease component	0.000152678	2.35481e-05	0.000381524	7.20146e-05	0.012965	0.00226611	0.00482862	0.0463833	0.25908
COG0392	Predicted integral membrane protein	0.000173876	2.3125e-05	0.00048552	0.000196629	0.155996	0.0336157	0.0102509	0.0234201	1
COG0394	Protein-tyrosine-phosphatase	0.000719286	5.74681e-05	0.00127385	0.000490005	0.324207	0.110986	0.0620071	0.176932	1
COG0395	ABC-type sugar transport system, permease component	0.00273922	0.000225452	0.00698061	0.00202726	0.0630275	0.00821462	0.00146227	0.0348935	0.712356
COG0396	ABC-type transport system involved in Fe-S cluster assembly, ATPase component	0.000502566	4.88216e-05	0.00048678	6.01067e-05	0.871748	0.854363	0.810657	0.866504	1
COG0398	Uncharacterized conserved protein	0.000183313	3.75665e-05	0.000261783	6.11826e-05	0.337228	0.281947	0.319245	0.353712	1
COG0399	Predicted pyridoxal phosphate-dependent enzyme apparently involved in regulation of cell wall biogenesis	0.00114719	0.000103088	0.000494956	0.00018849	0.0126583	0.00710505	0.0110584	0.174541	0.254559
COG0400	Predicted esterase	6.95994e-05	1.66329e-05	0.00053356	0.000250286	0.0970742	0.0140606	0.00113287	1.10377e-05	0.959816
COG0401	Uncharacterized homolog of Blt101	0	0	7.85701e-05	4.68654e-05	0.132453	0.0217511	0.994466	0	1
COG0402	Cytosine deaminase and related metal-dependent hydrolases	0.000704606	9.27796e-05	0.00117369	0.00027239	0.142318	0.0589069	0.0641258	0.200491	1
COG0403	Glycine cleavage system protein P (pyridoxal-binding), N-terminal domain	0.00018916	3.53475e-05	4.94696e-05	2.66457e-05	0.0104914	0.0318594	0.0137788	0.0309705	0.228382
COG0404	Glycine cleavage system T protein (aminomethyltransferase)	0.000261668	2.86983e-05	0.000128893	5.6655e-05	0.0618369	0.0389601	0.0558285	0.257012	0.702937
COG0406	Fructose-2,6-bisphosphatase	0.000952442	6.696e-05	0.00171362	0.000555382	0.2318	0.0601995	0.0285178	0.147364	1
COG0407	Uroporphyrinogen-III decarboxylase	0.000292722	5.01844e-05	0.000174407	5.91392e-05	0.168096	0.194423	0.175874	0.395396	1
COG0410	ABC-type branched-chain amino acid transport systems, ATPase component	0.000539208	5.71688e-05	0.000621494	8.02792e-05	0.499593	0.433899	0.454796	0.619531	1
COG0411	ABC-type branched-chain amino acid transport systems, ATPase component	0.000516105	7.00494e-05	0.000544084	0.000137985	0.885934	0.843254	0.8682	0.757782	1
COG0412	Dienelactone hydrolase and related enzymes	8.6788e-06	5.29253e-06	0.000156448	9.75213e-05	0.171398	0.0356631	0.0118911	7.07291e-09	1
COG0413	Ketopantoate hydroxymethyltransferase	0.000275346	4.17507e-05	0.00017371	6.88561e-05	0.269808	0.215769	0.213583	0.830439	1
COG0415	Deoxyribodipyrimidine photolyase	9.42984e-06	6.25299e-06	0.000178443	0.000105592	0.150003	0.0282845	0.0161512	8.23622e-05	1
COG0416	Fatty acid/phospholipid biosynthesis enzyme	0.000326154	3.90862e-05	0.000251476	7.85202e-05	0.491318	0.357246	0.390479	0.92767	1
COG0417	DNA polymerase elongation subunit (family B)	4.9097e-05	1.39119e-05	0.000150204	8.51879e-05	0.304227	0.106905	0.0667311	0.0670286	1
COG0418	Dihydroorotase	1.40381e-05	9.67818e-06	6.58948e-05	3.86718e-05	0.253449	0.0958168	0.186105	0.0214153	1
COG0419	ATPase involved in DNA repair	0.000912777	3.857e-05	0.000692707	0.000148249	0.20335	0.0714705	0.101249	0.994633	1
COG0420	DNA repair exonuclease	0.000553336	3.84554e-05	0.00042059	0.000110502	0.319936	0.173176	0.212716	0.95142	1
COG0421	Spermidine synthase	0.000198944	2.71023e-05	0.000485919	0.000306314	0.449972	0.172577	0.0709297	0.116691	1
COG0423	Glycyl-tRNA synthetase (class II)	0.00057616	6.10938e-05	0.000368769	0.00019477	0.370691	0.205615	0.236762	0.792697	1
COG0424	Nucleotide-binding protein implicated in inhibition of septum formation	0.000512027	6.2674e-05	0.0003768	4.12923e-05	0.10588	0.202513	0.16072	0.940635	1
COG0425	Predicted redox protein, regulator of disulfide bond formation	0.00023257	3.2468e-05	0.0003257	9.94114e-05	0.470262	0.268467	0.240062	0.418575	1
COG0426	Uncharacterized flavoproteins	0.000688645	6.54776e-05	0.000218069	7.58049e-05	0.00102572	0.00142114	0.00100354	0.279517	0.0504461
COG0427	Acetyl-CoA hydrolase	0.000542216	3.94022e-05	0.000131366	6.65995e-06	9.89443e-06	3.09003e-05	2.54382e-06	0.148796	0.00722442
COG0428	Predicted divalent heavy-metal cations transporter	0.000402983	5.50819e-05	0.000159191	4.91762e-05	0.00821567	0.02048	0.00963159	0.376834	0.189279
COG0429	Predicted hydrolase of the alpha/beta-hydrolase fold	2.78097e-05	1.39233e-05	0.000142279	0.000122859	0.453346	0.180397	0.106407	0.00761203	1
COG0431	Predicted flavoprotein	2.49223e-05	8.71709e-06	0.000301176	7.10322e-05	0.00345975	9.81536e-05	0.000582204	9.7206e-05	0.101987
COG0433	Predicted ATPase	0.000299747	3.90213e-05	0.000511026	0.000164187	0.273706	0.104079	0.0811655	0.270266	1
COG0434	Predicted TIM-barrel enzyme	7.73455e-05	2.92489e-05	0.000121952	4.92017e-05	0.529609	0.430881	0.476098	0.334229	1
COG0435	Predicted glutathione S-transferase	3.16623e-05	1.18293e-05	0.000107131	6.25057e-05	0.298449	0.108771	0.0934612	0.0361389	1
COG0436	Aspartate/tyrosine/aromatic aminotransferase	0.00313192	0.000122857	0.00232086	0.000463912	0.129413	0.0393876	0.0479572	0.898408	1
COG0437	Fe-S-cluster-containing hydrogenase components 1	0.000377525	6.29249e-05	0.000757315	0.000287431	0.257641	0.0905289	0.0693916	0.168935	1
COG0438	Glycosyltransferase	0.00534583	0.000409785	0.00333715	0.000550601	0.0149868	0.0174173	0.0120648	0.692324	0.288547
COG0439	Biotin carboxylase	0.000493283	3.48629e-05	0.000520605	0.000161286	0.895782	0.81586	0.758014	0.705068	1
COG0440	Acetolactate synthase, small (regulatory) subunit	0.000403065	3.62498e-05	0.000500629	6.16268e-05	0.230593	0.178219	0.236208	0.53152	1
COG0441	Threonyl-tRNA synthetase	0.000896825	5.89452e-05	0.000518364	0.00012469	0.0204881	0.00906714	0.0124523	0.589883	0.358547
COG0442	Prolyl-tRNA synthetase	0.000665878	3.16325e-05	0.000550882	7.43011e-05	0.209399	0.115913	0.07942	0.956429	1
COG0443	Molecular chaperone	0.000985119	7.10585e-05	0.000679559	9.29144e-05	0.0253528	0.0312635	0.0271142	0.774971	0.407187
COG0444	ABC-type dipeptide/oligopeptide/nickel transport system, ATPase component	0.0010195	7.96493e-05	0.00166678	0.000414995	0.166484	0.0459762	0.0280289	0.286066	1
COG0445	NAD/FAD-utilizing enzyme apparently involved in cell division	0.00101734	2.71466e-05	0.000295122	9.31627e-05	5.27703e-05	7.01166e-07	5.66551e-05	0.127197	0.0156529
COG0446	Uncharacterized NAD(FAD)-dependent dehydrogenases	0.00111014	7.28564e-05	0.00112264	0.000100526	0.937151	0.924261	0.889493	0.773904	1
COG0447	Dihydroxynaphthoic acid synthase	0.000172044	4.12552e-05	0.000160108	4.29192e-05	0.873932	0.865626	0.843978	0.850187	1
COG0448	ADP-glucose pyrophosphorylase	0.000895435	0.000106175	0.000560756	0.000103129	0.0466258	0.0831132	0.0558082	0.647098	0.589308
COG0449	Glucosamine 6-phosphate synthetase, contains amidotransferase and phosphosugar isomerase domains	0.000932815	6.79889e-05	0.000756703	0.000127753	0.28651	0.20827	0.218084	0.932177	1
COG0450	Peroxiredoxin	0.000245301	2.626e-05	0.000276198	8.47904e-05	0.782346	0.652717	0.592433	0.643964	1
COG0451	Nucleoside-diphosphate-sugar epimerases	0.00238159	0.000136057	0.00118413	0.00043522	0.0248251	0.00514451	0.0163364	0.39953	0.402114
COG0452	Phosphopantothenoylcysteine synthetase/decarboxylase	0.000648057	8.93528e-05	0.000310744	7.92405e-05	0.0177836	0.0413849	0.0178857	0.372355	0.322755
COG0454	Histone acetyltransferase HPA2 and related acetyltransferases	3.1035e-05	1.41056e-05	1.7113e-05	1.7113e-05	0.617138	0.576678	0.55829	0.546485	1
COG0455	ATPases involved in chromosome partitioning	8.51968e-05	2.01034e-05	0.00016541	9.69799e-05	0.512686	0.2648	0.233223	0.162487	1
COG0456	Acetyltransferases	0.00046279	4.03854e-05	0.000502509	8.37513e-05	0.735261	0.634973	0.60364	0.692492	1
COG0457	FOG: TPR repeat	0.000442408	7.79051e-05	0.000145684	5.35185e-05	0.0107882	0.0361564	0.0114087	0.141893	0.230256
COG0458	Carbamoylphosphate synthase large subunit (split gene in MJ)	0.00154245	8.80643e-05	0.000922353	0.000178095	0.0111411	0.00469941	0.00598503	0.521789	0.234481
COG0459	Chaperonin GroEL (HSP60 family)	0.000654617	3.56529e-05	0.000432643	2.42579e-05	0.00060356	0.00246841	0.00212667	0.634183	0.0382627
COG0460	Homoserine dehydrogenase	0.000563007	3.78161e-05	0.000467629	0.000108796	0.503085	0.310343	0.260992	0.917578	1
COG0461	Orotate phosphoribosyltransferase	0.000593246	4.10876e-05	0.000439062	1.71671e-05	0.00643468	0.034855	0.0331747	0.774204	0.159889
COG0462	Phosphoribosylpyrophosphate synthetase	0.000652863	6.15194e-05	0.000779644	0.000194117	0.620318	0.428545	0.459949	0.579798	1
COG0463	Glycosyltransferases involved in cell wall biogenesis	0.00608421	0.00029053	0.00381158	0.00108767	0.0698645	0.017722	0.0330824	0.548455	0.762242
COG0464	ATPases of the AAA+ class	0.000267315	2.36147e-05	0.000564871	0.000312315	0.441262	0.163662	0.0705981	0.100163	1
COG0465	ATP-dependent Zn proteases	0.00127627	7.41622e-05	0.000704199	3.64366e-05	8.90498e-05	0.000457312	0.000126733	0.417441	0.0216733
COG0466	ATP-dependent Lon protease, bacterial type	0.000871042	6.51737e-05	0.000320076	4.66603e-05	0.000105541	0.000261124	4.93404e-05	0.128132	0.0232973
COG0467	RecA-superfamily ATPases implicated in signal transduction	3.25948e-06	2.15849e-06	0	0	0.351417	0.347103	0.996887	0.0532162	1
COG0468	RecA/RadA recombinase	0.00049891	3.07568e-05	0.000372897	0.000133562	0.456311	0.217131	0.213024	0.746909	1
COG0470	ATPase involved in DNA replication	0.000279849	1.90442e-05	0.000339089	4.37385e-05	0.277143	0.167987	0.228058	0.551445	1
COG0471	Di- and tricarboxylate transporters	0.00111444	6.41594e-05	0.00124465	0.000508524	0.840726	0.704163	0.68361	0.666258	1
COG0472	UDP-N-acetylmuramyl pentapeptide phosphotransferase/UDP-N-acetylglucosamine-1-phosphate transferase	0.00104282	4.23598e-05	0.000792503	0.000161255	0.178997	0.0617101	0.0565686	0.750353	1
COG0473	Isocitrate/isopropylmalate dehydrogenase	0.000638215	5.34092e-05	0.000508631	6.25752e-05	0.155748	0.182286	0.140521	0.821584	1
COG0474	Cation transport ATPase	0.00122009	0.000112956	0.00209576	0.000295902	0.0197889	0.00548638	0.00837733	0.193472	0.351093
COG0475	Kef-type K+ transport systems, membrane components	0.000845754	5.99508e-05	0.000385555	0.00010463	0.0037203	0.00186282	0.00273546	0.200348	0.107578
COG0476	Dinucleotide-utilizing enzymes involved in molybdopterin and thiamine biosynthesis family 2	0.000454821	2.94478e-05	0.000857808	0.000376311	0.348106	0.121958	0.0513927	0.127832	1
COG0477	Permeases of the major facilitator superfamily	0	0	0	0	1	NaN	0.999996	1	1
COG0478	RIO-like serine/threonine protein kinase fused to N-terminal HTH domain	2.75863e-06	1.82642e-06	0	0	0.351417	0.347004	0.996899	0.0510186	1
COG0479	Succinate dehydrogenase/fumarate reductase, Fe-S protein subunit	0.000225144	3.91512e-05	0.000814928	0.000282033	0.0639675	0.00916964	0.00319483	0.00265002	0.717702
COG0480	Translation elongation factors (GTPases)	0.00205947	0.000132664	0.00129025	0.000302458	0.0414741	0.0185336	0.022534	0.453669	0.552133
COG0481	Membrane GTPase LepA	0.000700625	5.27714e-05	0.000481788	5.66807e-05	0.017744	0.0311066	0.0273354	0.575505	0.322654
COG0482	Predicted tRNA(5-methylaminomethyl-2-thiouridylate) methyltransferase, contains the PP-loop ATPase domain	0.000916766	4.56014e-05	0.000269828	5.09825e-05	9.89443e-06	4.12058e-06	2.9548e-06	0.0355402	0.00722442
COG0483	Archaeal fructose-1,6-bisphosphatase and related enzymes of inositol monophosphatase family	0.000247752	2.43454e-05	0.00040757	9.14992e-05	0.129967	0.0397691	0.0426808	0.204621	1
COG0484	DnaJ-class molecular chaperone with C-terminal Zn finger domain	0.000707793	5.55655e-05	0.000515142	6.7117e-05	0.0507551	0.0681105	0.0566704	0.632489	0.617298
COG0486	Predicted GTPase	0.00060021	3.79577e-05	0.000388199	3.99913e-05	0.0035521	0.00662378	0.00336473	0.472914	0.103743
COG0488	ATPase components of ABC transporters with duplicated ATPase domains	0.00258456	0.00010451	0.00209666	8.46907e-05	0.00494062	0.0148932	0.0114	0.796004	0.132475
COG0489	ATPases involved in chromosome partitioning	0.00110131	6.84481e-05	0.00131235	0.0006565	0.800354	0.629501	0.601841	0.559303	1
COG0490	Putative regulatory, ligand-binding protein related to C-terminal domains of K+ channels	4.54158e-06	3.01761e-06	2.60741e-05	9.31009e-06	0.0517314	0.0148128	0.0966519	0.0162613	0.625518
COG0491	Zn-dependent hydrolases, including glyoxylases	0.00106531	0.000102385	0.000870328	0.00035253	0.673619	0.487696	0.518718	0.919345	1
COG0492	Thioredoxin reductase	0.00090446	6.1917e-05	0.000923754	0.000135249	0.918711	0.882496	0.930948	0.699493	1
COG0493	NADPH-dependent glutamate synthase beta chain and related oxidoreductases	0.00148949	0.000109241	0.00119771	9.56941e-05	0.0708474	0.130132	0.10238	0.956637	0.770123
COG0494	NTP pyrophosphohydrolases including oxidative damage repair enzymes	0.0015214	6.44749e-05	0.00250821	0.000507341	0.0839674	0.0130006	0.00520273	0.3064	0.861637
COG0495	Leucyl-tRNA synthetase	0.000721303	3.5498e-05	0.00056132	0.000129957	0.297961	0.131346	0.115857	0.955762	1
COG0496	Predicted acid phosphatase	0.000194149	2.72484e-05	0.000128579	8.64668e-05	0.560991	0.359412	0.419669	0.863826	1
COG0497	ATPase involved in DNA repair	0.000711372	6.13146e-05	0.000654735	0.000175815	0.80979	0.703803	0.708889	0.826418	1
COG0498	Threonine synthase	0.000655859	7.15989e-05	0.000554605	8.3144e-05	0.454794	0.423548	0.392646	0.909703	1
COG0499	S-adenosylhomocysteine hydrolase	0.000198885	4.41099e-05	0.000269003	7.38024e-05	0.509725	0.411432	0.459538	0.462939	1
COG0500	SAM-dependent methyltransferases	0.00185077	0.000107588	0.0012912	0.000408456	0.244742	0.0938086	0.129819	0.873294	1
COG0501	Zn-dependent protease with chaperone function	0.000416283	3.95055e-05	0.000762395	0.000311487	0.333122	0.119008	0.0696406	0.231927	1
COG0502	Biotin synthase and related enzymes	0.000493728	7.77153e-05	0.000214927	8.55787e-05	0.0361015	0.05675	0.0387878	0.433627	0.506904
COG0503	Adenine/guanine phosphoribosyltransferases and related PRPP-binding proteins	0.000851575	5.11973e-05	0.000864899	0.000220512	0.962968	0.934812	0.991545	0.74043	1
COG0504	CTP synthase (UTP-ammonia lyase)	0.000670909	4.17596e-05	0.000618455	5.03166e-05	0.516806	0.478818	0.510555	0.838084	1
COG0505	Carbamoylphosphate synthase small subunit	0.000616573	4.86322e-05	0.000595857	6.85344e-05	0.845624	0.814615	0.744564	0.805541	1
COG0507	ATP-dependent exoDNAse (exonuclease V), alpha subunit - helicase superfamily I member	0.00160264	9.74614e-05	0.000849815	9.24516e-05	0.00037269	0.000665933	0.00026684	0.555175	0.034918
COG0508	Pyruvate/2-oxoglutarate dehydrogenase complex, dihydrolipoamide acyltransferase (E2) component, and related enzymes	0.000160167	3.10888e-05	0.000360237	5.59753e-05	0.0110785	0.00622184	0.022873	0.127108	0.23368
COG0509	Glycine cleavage system H protein (lipoate-binding)	0.000246439	3.02375e-05	0.000320443	6.12101e-05	0.341387	0.245399	0.299655	0.483995	1
COG0510	Predicted choline kinase involved in LPS biosynthesis	0.000182707	3.73427e-05	0.000298091	2.70169e-05	0.0305573	0.0801296	0.157106	0.298513	0.457489
COG0511	Biotin carboxyl carrier protein	0.000457521	3.03552e-05	0.000160001	6.47728e-05	0.00218337	0.000547146	0.00224663	0.246656	0.0787388
COG0512	Anthranilate/para-aminobenzoate synthases component II	0.000422933	2.20519e-05	0.000775165	0.000155071	0.0475229	0.00574795	0.00219425	0.21623	0.594315
COG0513	Superfamily II DNA and RNA helicases	0.00132145	6.21809e-05	0.00116741	0.000184019	0.521802	0.326287	0.334655	0.91637	1
COG0514	Superfamily II DNA helicase	0.00119245	8.14369e-05	0.000559557	4.19321e-05	9.56461e-05	0.000437795	8.31271e-05	0.397204	0.0226967
COG0515	Serine/threonine protein kinase	0.000815282	6.50705e-05	0.00189401	0.000729216	0.190461	0.0418439	0.0103853	0.0975	1
COG0516	IMP dehydrogenase/GMP reductase	0.000457329	3.76771e-05	0.000573157	6.67244e-05	0.172935	0.133424	0.186029	0.525133	1
COG0517	FOG: CBS domain	0.000663585	5.3184e-05	0.000603663	0.000106293	0.689764	0.581559	0.631307	0.899917	1
COG0518	GMP synthase - Glutamine amidotransferase domain	0.000434204	2.50983e-05	0.000594211	7.62917e-05	0.0734727	0.0246109	0.0311321	0.435968	0.789693
COG0519	GMP synthase, PP-ATPase domain/subunit	0.000522914	3.52582e-05	0.000379982	4.64777e-05	0.0337301	0.04044	0.0302459	0.800531	0.485834
COG0520	Selenocysteine lyase	0.00078224	3.80364e-05	0.000783762	1.96953e-05	0.977342	0.980137	0.960305	0.791794	1
COG0522	Ribosomal protein S4 and related proteins	0.000478665	4.59435e-05	0.000590852	0.000242884	0.719618	0.518072	0.488498	0.54363	1
COG0523	Putative GTPases (G3E family)	0.00047628	6.11556e-05	0.000445022	0.000190474	0.901293	0.840916	0.869702	0.883716	1
COG0524	Sugar kinases, ribokinase family	0.00233328	0.000152037	0.00274262	0.000255463	0.226299	0.176571	0.193709	0.596704	1
COG0525	Valyl-tRNA synthetase	0.000848953	6.85423e-05	0.000579194	0.000135489	0.110359	0.0717625	0.0692626	0.711504	1
COG0526	Thiol-disulfide isomerase and thioredoxins	0.00281064	0.000208659	0.0014412	0.000157455	0.000531001	0.00182121	0.000474061	0.416666	0.0370606
COG0527	Aspartokinases	0.000967341	3.05385e-05	0.00113747	0.00049257	0.784602	0.597262	0.591215	0.597734	1
COG0528	Uridylate kinase	0.000418224	2.60951e-05	0.000346233	4.47771e-05	0.22179	0.169654	0.167902	0.916702	1
COG0529	Adenylylsulfate kinase and related kinases	0.000109637	1.47024e-05	7.18174e-05	4.4923e-05	0.517986	0.317763	0.400543	0.679227	1
COG0530	Ca2+/Na+ antiporter	0.00041072	1.99483e-05	0.00012191	5.91819e-05	0.00115105	8.98216e-05	0.00196825	0.102512	0.0545924
COG0531	Amino acid transporters	0.0009275	8.54673e-05	0.00191635	0.000219106	0.00204485	0.000294994	0.000802961	0.112699	0.0748931
COG0532	Translation initiation factor 2 (IF-2; GTPase)	0.000874534	6.46909e-05	0.000452924	4.94217e-05	0.000587069	0.00192578	0.000683379	0.376488	0.0382627
COG0533	Metal-dependent proteases with possible chaperone activity	0.000775189	6.29579e-05	0.000442613	7.0952e-05	0.00599602	0.00972473	0.00558203	0.466951	0.151854
COG0534	Na+-driven multidrug efflux pump	0.00720875	0.000310691	0.00330349	0.00104329	0.00535948	0.000537414	0.00329599	0.278831	0.140143
COG0535	Predicted Fe-S oxidoreductases	0.000797205	6.44945e-05	0.000254579	0.000123172	0.00323878	0.00122326	0.00483152	0.0920389	0.0989344
COG0536	Predicted GTPase	0.000687797	5.26073e-05	0.000356988	4.15428e-05	0.000748678	0.00250719	0.00107925	0.35475	0.0421009
COG0537	Diadenosine tetraphosphate (Ap4A) hydrolase and other HIT family hydrolases	0.000581011	5.72173e-05	0.000597543	9.57126e-05	0.906465	0.879478	0.932486	0.783538	1
COG0538	Isocitrate dehydrogenases	0.000418072	2.52778e-05	0.000523939	0.000195928	0.670865	0.429147	0.428177	0.519318	1
COG0539	Ribosomal protein S1	0.000635821	5.40762e-05	0.000321185	6.43855e-05	0.00414576	0.00589017	0.00375508	0.30985	0.115739
COG0540	Aspartate carbamoyltransferase, catalytic chain	0.000609732	4.35261e-05	0.000338658	2.68636e-05	0.000511212	0.00235976	0.00111618	0.394868	0.0366394
COG0541	Signal recognition particle GTPase	0.000617873	5.98603e-05	0.00030752	4.55726e-05	0.0023087	0.00815406	0.00326245	0.296147	0.0810947
COG0542	ATPases with chaperone activity, ATP-binding subunit	0.00201057	0.000117803	0.00136439	0.00017413	0.0119789	0.0109541	0.00881456	0.61381	0.245578
COG0543	2-polyprenylphenol hydroxylase and related flavodoxin oxidoreductases	0.0010337	4.59885e-05	0.000581426	2.15994e-05	1.31926e-05	5.98352e-05	3.60899e-05	0.381076	0.00894452
COG0544	FKBP-type peptidyl-prolyl cis-trans isomerase (trigger factor)	0.000738211	3.63063e-05	0.000538223	0.00010926	0.118809	0.0449538	0.0560278	0.688456	1
COG0545	FKBP-type peptidyl-prolyl cis-trans isomerases 1	0.000634064	8.25664e-05	0.000866723	0.00032003	0.572066	0.348551	0.329519	0.400654	1
COG0546	Predicted phosphatases	0.00114539	4.73747e-05	0.00057846	0.000133603	0.00275725	0.000341774	0.00129186	0.284244	0.0908738
COG0547	Anthranilate phosphoribosyltransferase	0.000375136	2.56582e-05	0.000519467	5.67076e-05	0.0421173	0.0200562	0.0349612	0.384178	0.556016
COG0548	Acetylglutamate kinase	0.000638771	6.88154e-05	0.000546917	0.000148134	0.655189	0.527691	0.492295	0.909666	1
COG0549	Carbamate kinase	0.000230324	2.84518e-05	0.000762737	9.4e-05	0.000435355	1.64602e-05	8.13589e-05	0.00585749	0.0351549
COG0550	Topoisomerase IA	0.00254976	9.33984e-05	0.00126757	0.000323653	0.00377967	0.000316167	0.00171161	0.249166	0.108062
COG0551	Zn-finger domain associated with topoisomerase type I	0.000271422	2.02758e-05	0.000239948	4.3929e-05	0.603111	0.465366	0.562272	0.960878	1
COG0552	Signal recognition particle GTPase	0.000566989	5.5906e-05	0.000536093	0.000101254	0.832745	0.777929	0.717552	0.941253	1
COG0553	Superfamily II DNA/RNA helicases, SNF2 family	0.000817491	6.14449e-05	0.000968195	0.000289258	0.68637	0.476918	0.456421	0.579623	1
COG0554	Glycerol kinase	0.000568872	3.90641e-05	0.000484813	9.59638e-05	0.511915	0.344266	0.38036	0.895527	1
COG0555	ABC-type sulfate transport system, permease component	9.85288e-05	2.27017e-05	0.000200264	0.000101376	0.427426	0.188538	0.157728	0.203012	1
COG0556	Helicase subunit of the DNA excision repair complex	0.000816586	5.27933e-05	0.000578052	6.1803e-05	0.014812	0.0225211	0.0166218	0.958918	0.285761
COG0557	Exoribonuclease R	0.000626344	7.91364e-05	0.000309127	9.29667e-05	0.0259795	0.0384257	0.0265486	0.647767	0.411679
COG0558	Phosphatidylglycerophosphate synthase	0.00061046	4.81317e-05	0.000681137	0.000224467	0.807804	0.665564	0.69374	0.613647	1
COG0559	Branched-chain amino acid ABC-type transport system, permease components	0.000451895	7.73463e-05	0.000530286	0.000159903	0.727422	0.624352	0.626252	0.571824	1
COG0560	Phosphoserine phosphatase	0.000338212	4.12883e-05	0.000620612	0.000113904	0.041362	0.0131197	0.0183733	0.246696	0.551853
COG0561	Predicted hydrolases of the HAD superfamily	0.0022226	0.000162394	0.00238425	0.000349099	0.739826	0.636077	0.661743	0.657599	1
COG0562	UDP-galactopyranose mutase	0.00051667	6.03621e-05	0.00045871	0.000121298	0.734938	0.638663	0.6299	0.834651	1
COG0563	Adenylate kinase and related kinases	0.000616554	6.63986e-05	0.000487864	9.00795e-05	0.312723	0.293654	0.245752	0.981996	1
COG0564	Pseudouridylate synthases, 23S RNA-specific	0.00180448	9.62306e-05	0.00161141	0.000208754	0.497218	0.349579	0.329312	0.854826	1
COG0565	rRNA methylase	1.54311e-05	8.95527e-06	0.000112638	6.56885e-05	0.193703	0.0470019	0.0565854	0.00287628	1
COG0566	rRNA methylases	0.00159471	0.000100399	0.00123546	0.000308103	0.330434	0.174431	0.173159	0.971163	1
COG0567	2-oxoglutarate dehydrogenase complex, dehydrogenase (E1) component, and related enzymes	1.41033e-05	1.04318e-05	0.00012377	3.55906e-05	0.0142876	0.00212958	0.0784131	0.0011089	0.277903
COG0568	DNA-directed RNA polymerase, sigma subunit (sigma70/sigma32)	0.000982738	6.94108e-05	0.000643662	0.000121506	0.0353462	0.0253561	0.026371	0.800061	0.500006
COG0569	K+ transport systems, NAD-binding component	0.00125459	6.29968e-05	0.000993109	0.000203701	0.282901	0.131326	0.155198	1	1
COG0571	dsRNA-specific ribonuclease	0.000605984	3.29172e-05	0.000504101	0.000106798	0.459982	0.250524	0.201476	0.94833	1
COG0572	Uridine kinase	0.000664643	6.54033e-05	0.000210562	5.72204e-05	0.000544193	0.00135941	0.00045104	0.234904	0.0377041
COG0573	ABC-type phosphate transport system, permease component	0.000508151	5.18698e-05	0.00024308	3.58574e-05	0.00204815	0.00846962	0.0031312	0.488575	0.0748931
COG0574	Phosphoenolpyruvate synthase/pyruvate phosphate dikinase	0.00127094	5.95732e-05	0.000407422	6.85219e-05	9.89443e-06	3.51498e-06	2.6399e-06	0.237497	0.00722442
COG0575	CDP-diglyceride synthetase	0.000552513	3.73985e-05	0.000464128	0.000122803	0.58071	0.37773	0.32706	0.930271	1
COG0576	Molecular chaperone GrpE (heat shock protein)	0.00050328	4.8118e-05	0.000403783	6.47949e-05	0.280547	0.263417	0.236616	0.978722	1
COG0577	ABC-type antimicrobial peptide transport system, permease component	0.00433904	0.000313576	0.00317206	0.000945589	0.304188	0.155184	0.175379	0.87105	1
COG0578	Glycerol-3-phosphate dehydrogenase	0.000122578	3.25648e-05	0.00028009	0.000123059	0.278551	0.115049	0.118171	0.115347	1
COG0579	Predicted dehydrogenase	0.000357597	4.15845e-05	0.000322423	0.000168917	0.872843	0.781603	0.814184	0.881115	1
COG0581	ABC-type phosphate transport system, permease component	0.000463246	4.14707e-05	0.000537784	0.000155485	0.714331	0.535638	0.583059	0.610161	1
COG0582	Integrase	0.00505451	0.000320941	0.00383959	0.000392364	0.0369722	0.0498164	0.0374273	0.892529	0.514029
COG0583	Transcriptional regulator	0.0037402	0.00026071	0.0089577	0.00423041	0.281219	0.0780427	0.0181213	0.0911968	1
COG0584	Glycerophosphoryl diester phosphodiesterase	0.000703209	4.53868e-05	0.000991135	0.000313906	0.461763	0.195724	0.16295	0.412645	1
COG0585	Uncharacterized conserved protein	7.95479e-06	7.95479e-06	6.09687e-05	3.61953e-05	0.207226	0.0644453	0.213457	0.0014219	1
COG0586	Uncharacterized membrane-associated protein	0.000292932	5.81525e-05	0.00123594	0.00034125	0.0210718	0.00187356	0.00167651	0.00721464	0.363717
COG0587	DNA polymerase III, alpha subunit	0.00103629	9.71627e-05	0.00151308	0.000390195	0.298749	0.124701	0.114068	0.376492	1
COG0588	Phosphoglycerate mutase 1	0.000249369	2.9806e-05	0.000500875	0.00027691	0.464131	0.189293	0.110465	0.158189	1
COG0589	Universal stress protein UspA and related nucleotide-binding proteins	0.00044416	5.62613e-05	0.00125697	0.000243347	0.00879285	0.000727605	0.000843373	0.0400943	0.198717
COG0590	Cytosine/adenosine deaminases	0.000558958	4.54826e-05	0.00048151	0.00015272	0.700163	0.527324	0.481861	0.951294	1
COG0591	Na+/proline symporter	0.000883737	6.85516e-05	0.000516399	6.76299e-05	0.00374009	0.00797163	0.0031141	0.555974	0.107578
COG0592	DNA polymerase sliding clamp subunit (PCNA homolog)	0.000723253	6.10865e-05	0.000490082	6.3799e-05	0.0243172	0.0432419	0.0272108	0.718914	0.396594
COG0593	ATPase involved in DNA replication initiation	0.000724649	7.06836e-05	0.000476741	4.77829e-05	0.015465	0.050166	0.0293042	0.660959	0.295358
COG0594	RNase P protein component	0.000316526	3.65274e-05	0.000229984	2.23208e-05	0.0695644	0.162978	0.121535	0.784283	0.759841
COG0595	Predicted hydrolase of the metallo-beta-lactamase superfamily	0.000440046	3.53355e-05	0.000615922	0.000186143	0.452409	0.199512	0.185771	0.409306	1
COG0596	Predicted hydrolases or acyltransferases (alpha/beta hydrolase superfamily)	0.000741243	7.00997e-05	0.00135216	0.000288691	0.0654384	0.0145036	0.0106019	0.191658	0.727328
COG0597	Lipoprotein signal peptidase	0.00041101	2.65293e-05	0.000513514	0.000229646	0.726119	0.507948	0.505112	0.532014	1
COG0598	Mg2+ and Co2+ transporters	0.000402911	4.73222e-05	0.000613308	4.01834e-05	0.00721963	0.0194953	0.0467772	0.321304	0.173052
COG0599	Uncharacterized homolog of gamma-carboxymuconolactone decarboxylase subunit	0.0003523	2.79478e-05	0.000338608	0.000120012	0.930676	0.877397	0.882913	0.846837	1
COG0600	ABC-type nitrate/sulfonate/bicarbonate transport system, permease component	0.000548835	5.44051e-05	0.000832075	0.000164827	0.141903	0.0566737	0.0570934	0.325607	1
COG0601	ABC-type dipeptide/oligopeptide/nickel transport systems, permease components	0.00119193	8.88094e-05	0.00245824	0.0003081	0.00303099	0.000234045	0.00028955	0.110733	0.0965262
COG0602	Organic radical activating enzymes	0.000838666	4.07009e-05	0.000437185	5.34215e-05	0.000247361	0.000147638	0.000140116	0.373217	0.0313058
COG0603	Predicted PP-loop superfamily ATPase	0.000243988	2.89261e-05	0.000177297	9.06464e-05	0.573511	0.375544	0.430585	0.745177	1
COG0604	NADPH:quinone reductase and related Zn-dependent oxidoreductases	0.000111233	2.1952e-05	0.000992988	0.000284272	0.0116622	0.000506013	5.40667e-05	1.25191e-05	0.242162
COG0605	Superoxide dismutase	0.000149621	1.55496e-05	0.000296228	0.000134498	0.34179	0.1229	0.0510107	0.124222	1
COG0606	Predicted ATPase with chaperone activity	0.000658295	6.34745e-05	0.000412951	5.77183e-05	0.0167381	0.0380176	0.0262053	0.537164	0.31275
COG0607	Rhodanese-related sulfurtransferase	0.000413729	2.76051e-05	0.00119086	0.000280635	0.0201088	0.00127869	9.29046e-05	0.0216267	0.354122
COG0608	Single-stranded DNA-specific exonuclease	0.000593584	5.50105e-05	0.000341351	7.35317e-05	0.0204188	0.0239149	0.0205539	0.443892	0.358547
COG0609	ABC-type Fe3+-siderophore transport system, permease component	0.000950583	6.46814e-05	0.00148478	0.000420106	0.272031	0.084576	0.047406	0.271746	1
COG0610	Type I site-specific restriction-modification system, R (restriction) subunit and related helicases	0.000969916	7.43167e-05	0.000687973	0.000186858	0.217222	0.113041	0.109983	0.663258	1
COG0611	Thiamine monophosphate kinase	0.000230713	2.45814e-05	0.000190712	5.58192e-05	0.599968	0.453986	0.505604	0.892281	1
COG0612	Predicted Zn-dependent peptidases	0.00150709	0.000113036	0.000450902	6.22469e-05	2.3087e-05	9.87879e-05	5.38702e-06	0.0575871	0.0108366
COG0613	Predicted metal-dependent phosphoesterases (PHP family)	0.000546281	7.86248e-05	0.00062543	0.000212224	0.781317	0.668439	0.65813	0.628698	1
COG0614	ABC-type Fe3+-hydroxamate transport system, periplasmic component	0.00108837	7.43622e-05	0.00111867	0.000408061	0.954182	0.91592	0.883772	0.792575	1
COG0615	Cytidylyltransferase	0.000163196	3.58431e-05	0.000149421	7.86416e-05	0.899232	0.855676	0.879224	0.969705	1
COG0616	Periplasmic serine proteases (ClpP class)	0.000290003	4.254e-05	0.000400712	0.000178123	0.630407	0.410921	0.372917	0.387239	1
COG0617	tRNA nucleotidyltransferase/poly(A) polymerase	0.000670147	6.50973e-05	0.000567026	3.91065e-05	0.232572	0.338468	0.307143	0.88381	1
COG0618	Exopolyphosphatase-related proteins	0.000543542	6.20395e-05	0.000108022	5.37986e-05	0.000507914	0.00124682	0.000810104	0.00776612	0.0366394
COG0619	ABC-type cobalt transport system, permease component CbiQ and related transporters	0.00103037	0.00011941	0.00097835	0.000205089	0.862101	0.820786	0.799467	0.919878	1
COG0620	Methionine synthase II (cobalamin-independent)	0.000401944	4.98842e-05	0.000553077	0.000173261	0.498069	0.280206	0.271976	0.384281	1
COG0621	2-methylthioadenine synthetase	0.00171422	7.42759e-05	0.000781447	0.000180481	0.000897095	0.000119448	0.000358677	0.164768	0.0449815
COG0622	Predicted phosphoesterase	0.000536741	7.40844e-05	0.000218566	0.000100734	0.0283047	0.032682	0.0304602	0.117053	0.438281
COG0623	Enoyl-[acyl-carrier-protein] reductase (NADH)	0.000218436	4.11673e-05	7.96774e-05	3.51932e-05	0.0275197	0.0627795	0.0344166	0.0875341	0.428926
COG0624	Acetylornithine deacetylase/Succinyl-diaminopimelate desuccinylase and related deacylases	0.00128503	4.8225e-05	0.00152289	0.000204782	0.32145	0.13724	0.0950436	0.575868	1
COG0625	Glutathione S-transferase	8.23437e-05	2.91236e-05	0.000876501	0.000595635	0.242123	0.0586575	0.00546471	0.000500263	1
COG0626	Cystathionine beta-lyases/cystathionine gamma-synthases	0.000286237	4.97376e-05	0.00129509	0.00033208	0.013242	0.000838158	0.000499457	0.0172475	0.26186
COG0627	Predicted esterase	0.000335404	5.45465e-05	0.000481564	0.00011039	0.298267	0.206129	0.250643	0.406533	1
COG0628	Predicted permease	0.000791591	5.47568e-05	0.00117229	0.00022586	0.140385	0.0413657	0.0328091	0.38454	1
COG0629	Single-stranded DNA-binding protein	0.00085457	5.55548e-05	0.000939675	0.000188805	0.732418	0.571905	0.612154	0.638071	1
COG0630	Type IV secretory pathway, VirB11 components, and related ATPases involved in archaeal flagella biosynthesis	3.2843e-05	8.83284e-06	2.05356e-05	2.05356e-05	0.662422	0.524466	0.572338	0.854181	1
COG0631	Serine/threonine protein phosphatase	0.00059071	2.21301e-05	0.000598498	0.000237918	0.979459	0.960361	0.992792	0.718604	1
COG0632	Holliday junction resolvasome, DNA-binding subunit	0.000477205	3.80987e-05	0.000222709	3.09867e-05	0.000583771	0.0016905	0.000491557	0.556756	0.0382627
COG0633	Ferredoxin	2.00572e-05	1.08378e-05	0.000193747	8.48973e-05	0.0685816	0.00990672	0.021769	0.000575235	0.753441
COG0634	Hypoxanthine-guanine phosphoribosyltransferase	0.000473829	4.27722e-05	0.00048323	7.16636e-05	0.929631	0.908191	0.967864	0.723811	1
COG0635	Coproporphyrinogen III oxidase and related Fe-S oxidoreductases	0.00112292	7.22105e-05	0.000662406	0.000129689	0.0115336	0.00653199	0.00743889	0.72076	0.241137
COG0636	F0F1-type ATP synthase, subunit c/Archaeal/vacuolar-type H+-ATPase, subunit K	0.000201998	3.60486e-05	0.000234516	6.63235e-05	0.733213	0.648125	0.70148	0.600188	1
COG0637	Predicted phosphatase/phosphohexomutase	0.00117329	4.30769e-05	0.00184285	0.000608798	0.335454	0.112189	0.0583332	0.333182	1
COG0638	20S proteasome, alpha and beta subunits	0	0	1.7113e-05	1.7113e-05	0.38111	0.13941	0.996722	0	1
COG0639	Diadenosine tetraphosphatase and related serine/threonine protein phosphatases	5.13741e-05	1.45784e-05	0.000114354	7.62943e-05	0.512241	0.258645	0.198061	0.139305	1
COG0640	Predicted transcriptional regulators	0.000569132	4.46575e-05	0.000645166	0.000112844	0.61789	0.457057	0.416025	0.61877	1
COG0641	Arylsulfatase regulator (Fe-S oxidoreductase)	0.000928236	6.50425e-05	0.000391196	0.00020555	0.0313258	0.00720336	0.0295739	0.387863	0.465325
COG0642	Signal transduction histidine kinase	0.0132054	0.000875181	0.00702278	0.000351515	0.000145118	0.000851561	0.00010736	0.565899	0.0270089
COG0643	Chemotaxis protein histidine kinase and related kinases	0.000124602	1.652e-05	7.64588e-05	4.58324e-05	0.423227	0.235632	0.292504	0.696614	1
COG0644	Dehydrogenases (flavoproteins)	8.9112e-05	2.70989e-05	0.000216393	9.67197e-05	0.267925	0.111785	0.124808	0.101607	1
COG0645	Predicted kinase	0	0	8.40147e-05	5.48345e-05	0.166362	0.0327583	0.996501	0	1
COG0646	Methionine synthase I (cobalamin-dependent), methyltransferase domain	0.000452676	3.01156e-05	0.000154614	4.94516e-05	0.00060356	0.000234791	0.000456309	0.240328	0.0382627
COG0647	Predicted sugar phosphatases of the HAD superfamily	0.000201751	4.19944e-05	0.0006426	8.44422e-05	0.00105211	0.000261204	0.00469737	0.0343237	0.0512131
COG0648	Endonuclease IV	0.000438262	2.74959e-05	0.000403142	6.17034e-05	0.680549	0.552605	0.642553	0.869997	1
COG0649	NADH:ubiquinone oxidoreductase 49 kD subunit 7	0.000159979	2.76568e-05	0.000200158	9.01074e-05	0.735905	0.581542	0.529014	0.513289	1
COG0650	Formate hydrogenlyase subunit 4	7.57525e-05	1.90602e-05	0.000161339	6.08593e-05	0.238245	0.103066	0.120869	0.140043	1
COG0651	Formate hydrogenlyase subunit 3/Multisubunit Na+/H+ antiporter, MnhD subunit	0.000189565	3.26458e-05	0.000247303	9.32516e-05	0.642653	0.469657	0.477239	0.480963	1
COG0652	Peptidyl-prolyl cis-trans isomerase (rotamase) - cyclophilin family	0.000685634	7.00126e-05	0.000713956	0.000206831	0.918714	0.869675	0.834344	0.727856	1
COG0653	Preprotein translocase subunit SecA (ATPase, RNA helicase)	0.00103744	7.36784e-05	0.000451832	5.08781e-05	0.000145118	0.000418129	7.83305e-05	0.325955	0.0270089
COG0654	2-polyprenyl-6-methoxyphenol hydroxylase and related FAD-dependent oxidoreductases	6.31763e-05	2.57022e-05	0.00067695	0.000385537	0.152186	0.0293338	0.00681278	2.60306e-05	1
COG0655	Multimeric flavodoxin WrbA	0.00082045	7.6851e-05	0.000473967	0.000117611	0.0325131	0.0301942	0.027611	0.564953	0.47699
COG0656	Aldo/keto reductases, related to diketogulonate reductase	0.000710621	9.4207e-05	0.00175561	0.00039227	0.0263423	0.00376569	0.00378027	0.0739363	0.414659
COG0657	Esterase/lipase	0.00115818	7.82099e-05	0.00129778	0.000272968	0.697254	0.518552	0.552223	0.655319	1
COG0658	Predicted membrane metal-binding protein	0.000287717	3.46251e-05	0.000227912	8.26873e-05	0.593148	0.438194	0.386567	0.902883	1
COG0659	Sulfate permease and related transporters (MFS superfamily)	0.000368777	3.44227e-05	0.00026965	0.000178735	0.665938	0.441113	0.503866	0.802125	1
COG0661	Predicted unusual protein kinase	0.000172513	3.72537e-05	0.000399376	9.35033e-05	0.0471601	0.0183408	0.0415991	0.0900109	0.592119
COG0662	Mannose-6-phosphate isomerase	0.000454883	3.86164e-05	0.000230695	9.53483e-05	0.0535255	0.0222073	0.0394813	0.398137	0.638269
COG0663	Carbonic anhydrases/acetyltransferases, isoleucine patch superfamily	0.000310709	4.90035e-05	0.000212482	9.032e-05	0.438524	0.319853	0.339127	0.707825	1
COG0664	cAMP-binding proteins - catabolite gene activator and regulatory subunit of cAMP-dependent protein kinases	0.00172174	0.000117252	0.00118617	7.49507e-05	0.0035422	0.0151115	0.00866489	0.708437	0.103743
COG0665	Glycine/D-amino acid oxidases (deaminating)	0.000133344	3.13328e-05	0.00065811	0.000310483	0.131418	0.0240778	0.00550626	0.00181304	1
COG0666	FOG: Ankyrin repeat	0.000198094	3.24091e-05	0.0001753	8.29907e-05	0.839684	0.757751	0.786114	0.984794	1
COG0667	Predicted oxidoreductases (related to aryl-alcohol dehydrogenases)	0.00117131	9.71518e-05	0.00213426	0.000115704	0.0001781	0.000119629	0.000807393	0.181801	0.0281752
COG0668	Small-conductance mechanosensitive channel	0.000951541	0.000107679	0.000979143	0.000295317	0.944881	0.913568	0.932362	0.769883	1
COG0669	Phosphopantetheine adenylyltransferase	0.000340016	5.37716e-05	0.000301122	6.69186e-05	0.720083	0.682959	0.67439	0.933188	1
COG0670	Integral membrane protein, interacts with FtsH	0.000127342	3.09851e-05	0.00043734	9.60816e-05	0.0120547	0.00196927	0.00938395	0.010207	0.246601
COG0671	Membrane-associated phospholipid phosphatase	0.000500689	4.2139e-05	0.000542879	0.000192519	0.865475	0.764047	0.736528	0.700781	1
COG0672	High-affinity Fe2+/Pb2+ permease	5.70886e-05	2.09432e-05	0.000368891	0.000115439	0.0237202	0.0023417	0.0086643	0.00017942	0.390888
COG0673	Predicted dehydrogenases and related proteins	0.00269236	0.000159725	0.00198347	0.000509763	0.243927	0.10657	0.130805	0.750262	1
COG0674	Pyruvate:ferredoxin oxidoreductase and related 2-oxoacid:ferredoxin oxidoreductases, alpha subunit	0.000831805	6.64857e-05	0.000256251	5.26937e-05	0.000115435	0.000231217	4.94233e-05	0.0733374	0.024349
COG0675	Transposase and inactivated derivatives	0.000660323	0.000145186	0.00228725	0.00135897	0.296826	0.0920676	0.0314784	0.00705877	1
COG0676	Uncharacterized enzymes related to aldose 1-epimerase	5.81374e-05	2.92352e-05	0.000252585	2.68401e-05	0.000765169	0.0019123	0.0821191	0.00221702	0.0421009
COG0677	UDP-N-acetyl-D-mannosaminuronate dehydrogenase	0.000348362	5.72098e-05	0.000241226	0.000103317	0.46207	0.347952	0.359233	0.661227	1
COG0678	Peroxiredoxin	0	0	0	0	1	NaN	0.999996	1	1
COG0679	Predicted permeases	0.000742133	6.70119e-05	0.000825982	0.000244971	0.793807	0.659324	0.688749	0.673638	1
COG0680	Ni,Fe-hydrogenase maturation factor	7.11496e-05	2.07465e-05	0.000212002	0.000112288	0.280161	0.095926	0.0688399	0.016675	1
COG0681	Signal peptidase I	0.000919716	7.32241e-05	0.000735975	0.00015128	0.337113	0.238072	0.229659	0.824171	1
COG0683	ABC-type branched-chain amino acid transport systems, periplasmic component	0.000459896	8.17632e-05	0.000789271	0.000217759	0.211965	0.103751	0.123581	0.18565	1
COG0685	5,10-methylenetetrahydrofolate reductase	0.000569698	4.85651e-05	0.000380883	6.95471e-05	0.0494754	0.0515829	0.0431052	0.560442	0.609894
COG0686	Alanine dehydrogenase	0.000258884	3.23981e-05	3.90132e-05	2.44449e-05	0.000441951	0.00143962	0.00107896	0.00379611	0.0351549
COG0687	Spermidine/putrescine-binding periplasmic protein	0.000600428	5.04912e-05	0.000331642	0.000172662	0.181493	0.0688476	0.122027	0.352544	1
COG0688	Phosphatidylserine decarboxylase	0.000247606	2.8663e-05	0.00017508	6.07424e-05	0.342938	0.23912	0.286934	0.625133	1
COG0689	RNase PH	7.94138e-05	1.21053e-05	0.000345713	7.76118e-05	0.00720644	0.000340458	0.000185269	0.000814664	0.173052
COG0690	Preprotein translocase subunit SecE	0.000126813	2.20339e-05	0.000200891	6.89202e-05	0.367007	0.20468	0.230113	0.260468	1
COG0691	tmRNA-binding protein	0.000397857	4.90066e-05	0.000362348	3.40988e-05	0.636393	0.659106	0.632943	1	1
COG0692	Uracil DNA glycosylase	0.000448416	4.82574e-05	0.000315321	5.49151e-05	0.102305	0.132027	0.104105	0.583969	0.998021
COG0693	Putative intracellular protease/amidase	0.000678562	7.89861e-05	0.0007152	0.000167764	0.875759	0.823869	0.814708	0.7629	1
COG0694	Thioredoxin-like proteins and domains	3.10762e-05	6.4582e-06	0.000106043	3.93804e-05	0.0922062	0.0168344	0.00599126	0.00527038	0.928119
COG0695	Glutaredoxin and related proteins	0.000104861	2.78467e-05	0.000532846	0.000115486	0.00516159	0.000352788	0.00276569	0.000127598	0.136854
COG0696	Phosphoglyceromutase	0.000706281	5.07533e-05	0.000263988	8.76251e-05	0.00165897	0.000724708	0.00143048	0.42252	0.0653282
COG0697	Permeases of the drug/metabolite transporter (DMT) superfamily	0.00149483	0.000136734	0.00126017	0.000205154	0.440487	0.361592	0.353158	0.884522	1
COG0698	Ribose 5-phosphate isomerase RpiB	0.000581477	5.17162e-05	0.000677722	0.000128208	0.576169	0.41302	0.39987	0.576734	1
COG0699	Predicted GTPases (dynamin-related)	0	0	0	0	1	NaN	0.999996	1	1
COG0700	Uncharacterized membrane protein	0.000364295	3.86115e-05	0.00018512	0.000108225	0.15961	0.0724969	0.12334	0.619192	1
COG0701	Predicted permeases	0.000142844	3.41894e-05	0.000294655	7.02064e-05	0.0810189	0.0489355	0.0975765	0.181949	0.842208
COG0702	Predicted nucleoside-diphosphate-sugar epimerases	6.03089e-05	1.28143e-05	0.000486489	0.000228826	0.0956791	0.0134513	0.000549275	0.00130071	0.953497
COG0703	Shikimate kinase	0.000543834	5.54641e-05	0.000450922	8.03969e-05	0.440701	0.368522	0.373637	0.926905	1
COG0704	Phosphate uptake regulator	0.000468802	3.80888e-05	0.000393166	6.4182e-05	0.371796	0.310062	0.258886	0.934055	1
COG0705	Uncharacterized membrane protein (homolog of Drosophila rhomboid)	0.000436219	4.27833e-05	0.000320674	6.0444e-05	0.159432	0.156301	0.152272	0.912187	1
COG0706	Preprotein translocase subunit YidC	0.000618207	3.18112e-05	0.000413333	9.60225e-05	0.0690202	0.0230093	0.0232064	0.827274	0.756509
COG0707	UDP-N-acetylglucosamine:LPS N-acetylglucosamine transferase	0.000795161	4.32681e-05	0.000474417	5.13876e-05	0.000900393	0.00117749	0.000576684	0.72267	0.0449815
COG0708	Exonuclease III	0.000798652	3.59713e-05	0.000380733	6.56042e-05	0.000379286	8.17544e-05	0.000129153	0.494989	0.034918
COG0709	Selenophosphate synthase	0.000205628	3.38864e-05	0.000170688	7.24812e-05	0.729925	0.623408	0.667733	0.913755	1
COG0711	F0F1-type ATP synthase, subunit b	0.000466349	3.33522e-05	0.000435419	0.000107827	0.828147	0.722559	0.712944	0.831588	1
COG0712	F0F1-type ATP synthase, delta subunit (mitochondrial oligomycin sensitivity protein)	0.000424192	2.60752e-05	0.000481679	0.000110744	0.689097	0.488652	0.535816	0.616855	1
COG0713	NADH:ubiquinone oxidoreductase subunit 11 or 4L (chain K)	0.000117087	1.94158e-05	7.37367e-05	3.99654e-05	0.429022	0.289929	0.335924	0.756407	1
COG0714	MoxR-like ATPases	0.00107929	6.57194e-05	0.000780652	0.000136306	0.0763421	0.0454314	0.0454645	0.862748	0.814197
COG0715	ABC-type nitrate/sulfonate/bicarbonate transport systems, periplasmic components	0.000633894	9.09458e-05	0.000999179	0.000238067	0.206434	0.101825	0.116889	0.325544	1
COG0716	Flavodoxins	0.00121882	0.000169995	0.000726171	0.000227964	0.119617	0.12647	0.106474	0.665162	1
COG0717	Deoxycytidine deaminase	9.34111e-05	2.02573e-05	0.000344831	5.26279e-05	0.00147427	0.000175879	0.00265698	0.0182754	0.061518
COG0718	Uncharacterized protein conserved in bacteria	0.000295329	3.3946e-05	0.000187456	7.5777e-05	0.254046	0.154808	0.185279	0.709335	1
COG0720	6-pyruvoyl-tetrahydropterin synthase	0.000286335	3.64982e-05	7.09594e-05	4.10642e-05	0.00316951	0.00507707	0.00601474	0.11936	0.0983897
COG0721	Asp-tRNAAsn/Glu-tRNAGln amidotransferase C subunit	0.000164984	3.48795e-05	0.000304579	0.000158635	0.486522	0.242783	0.223088	0.217162	1
COG0722	3-deoxy-D-arabino-heptulosonate 7-phosphate (DAHP) synthase	0.000274239	3.5466e-05	0.000719466	0.000161366	0.0221239	0.00260487	0.00202767	0.064047	0.377697
COG0723	Rieske Fe-S protein	3.31223e-05	1.30172e-05	4.42871e-05	2.13978e-05	0.72473	0.652223	0.681017	0.437855	1
COG0724	RNA-binding proteins (RRM domain)	0.000295832	5.34001e-05	0	0	0.000395777	0.00414517	0.996123	2.20782e-06	0.0351549
COG0725	ABC-type molybdate transport system, periplasmic component	0.000208121	3.19977e-05	0.000250608	7.02573e-05	0.662564	0.533327	0.548069	0.564639	1
COG0727	Predicted Fe-S-cluster oxidoreductase	3.78911e-05	1.13501e-05	1.54982e-05	1.54982e-05	0.306312	0.286213	0.305253	0.357842	1
COG0728	Uncharacterized membrane protein, putative virulence factor	0.000140318	2.62925e-05	0.000348618	9.04601e-05	0.0507452	0.0123269	0.0192196	0.0737385	0.617298
COG0729	Outer membrane protein	0.000150356	2.51184e-05	8.30812e-05	5.13084e-05	0.301787	0.207921	0.247619	0.532678	1
COG0730	Predicted permeases	0.00029254	6.9797e-05	0.000432496	0.000102787	0.323314	0.287471	0.349283	0.36403	1
COG0731	Fe-S oxidoreductases	0.000190557	3.25316e-05	0	0	0.00026715	0.00289252	0.996197	3.06398e-06	0.0313058
COG0732	Restriction endonuclease S subunits	0.00121999	0.000126225	0.00091432	0.000240295	0.323403	0.239461	0.222766	0.821929	1
COG0733	Na+-dependent transporters of the SNF family	0.000974345	9.75243e-05	0.000289031	0.000160647	0.00480209	0.0029799	0.00839019	0.113252	0.12995
COG0735	Fe2+/Zn2+ uptake regulation proteins	0.000585038	2.97594e-05	0.000532458	0.000119424	0.735242	0.56147	0.535196	0.909149	1
COG0736	Phosphopantetheinyl transferase (holo-ACP synthase)	0.000177688	2.6255e-05	0.000254086	2.30769e-05	0.0529385	0.10243	0.147564	0.383584	0.634446
COG0737	5'-nucleotidase/2',3'-cyclic phosphodiesterase and related esterases	0.000869413	3.98574e-05	0.000584437	0.000102763	0.0265138	0.00840683	0.0136656	0.673025	0.416668
COG0738	Fucose permease	0.000904249	9.47638e-05	0.000380308	0.000115639	0.00599932	0.00817478	0.00574662	0.248278	0.151854
COG0739	Membrane proteins related to metalloendopeptidases	0.00244137	0.000118526	0.000607522	0.000111171	9.89443e-06	1.36957e-06	7.41606e-07	0.0568505	0.00722442
COG0740	Protease subunit of ATP-dependent Clp proteases	0.00106151	7.4957e-05	0.0016243	0.000806344	0.576875	0.301436	0.223752	0.309703	1
COG0741	Soluble lytic murein transglycosylase and related regulatory proteins (some contain LysM/invasin domains)	0.00067026	5.79726e-05	0.000571989	0.000295313	0.795944	0.642136	0.674115	0.96757	1
COG0742	N6-adenine-specific methylase	0.000304979	3.8423e-05	0.000561976	0.000284299	0.467716	0.198827	0.136305	0.175765	1
COG0744	Membrane carboxypeptidase (penicillin-binding protein)	0.000908062	3.43685e-05	0.000867772	0.000224144	0.88789	0.793581	0.713442	0.880928	1
COG0745	Response regulators consisting of a CheY-like receiver domain and a winged-helix DNA-binding domain	0.00757867	0.000267147	0.00509987	0.000375664	0.000451845	0.000279335	0.000193238	0.625768	0.0351549
COG0746	Molybdopterin-guanine dinucleotide biosynthesis protein A	3.8578e-05	1.56478e-05	0.000120969	7.82844e-05	0.362937	0.160231	0.146417	0.0185094	1
COG0747	ABC-type dipeptide transport system, periplasmic component	0.00105236	9.17916e-05	0.00268243	0.000281555	0.000405671	1.73492e-05	5.8613e-05	0.0413448	0.0351549
COG0748	Putative heme iron utilization protein	0	0	0	0	1	NaN	0.999996	1	1
COG0749	DNA polymerase I - 3'-5' exonuclease and polymerase domains	0.00067189	4.32684e-05	0.000402523	4.94166e-05	0.00239115	0.00368951	0.00198396	0.468193	0.0825027
COG0750	Predicted membrane-associated Zn-dependent proteases 1	0.000646821	7.43487e-05	0.000274141	5.82683e-05	0.00305078	0.0100083	0.0033198	0.192882	0.0965262
COG0751	Glycyl-tRNA synthetase, beta subunit	0.000109967	2.87423e-05	0.000190752	8.61506e-05	0.470803	0.27184	0.276875	0.199629	1
COG0753	Catalase	0.000118061	2.23825e-05	0.00029844	7.92709e-05	0.052612	0.0124805	0.0177202	0.0411522	0.63134
COG0755	ABC-type transport system involved in cytochrome c biogenesis, permease component	0.00021092	3.99729e-05	0.00010822	4.88973e-05	0.143235	0.163018	0.145279	0.320317	1
COG0757	3-dehydroquinate dehydratase II	0.00040206	5.10433e-05	0.000267424	6.56355e-05	0.144637	0.156949	0.122047	0.56519	1
COG0758	Predicted Rossmann fold nucleotide-binding protein involved in DNA uptake	0.000562689	3.08972e-05	0.000418371	7.34658e-05	0.104037	0.051866	0.0531877	0.717829	1
COG0760	Parvulin-like peptidyl-prolyl isomerase	0.000511647	4.31019e-05	0.00049947	0.000172434	0.956761	0.925285	0.94111	0.863376	1
COG0762	Predicted integral membrane protein	0	0	0.000100225	5.90686e-05	0.127529	0.0205334	0.996475	1.50137e-12	1
COG0763	Lipid A disaccharide synthetase	0.000208043	3.29226e-05	6.94096e-05	4.01031e-05	0.0231266	0.0321059	0.0308761	0.0781335	0.385116
COG0764	3-hydroxymyristoyl/3-hydroxydecanoyl-(acyl carrier protein) dehydratases	0.000364405	2.92618e-05	0.000223826	4.13106e-05	0.0194129	0.0203869	0.0229237	0.456584	0.349072
COG0765	ABC-type amino acid transport system, permease component	0.00154193	0.000179207	0.00219376	0.000409363	0.196177	0.111505	0.130574	0.348944	1
COG0766	UDP-N-acetylglucosamine enolpyruvyl transferase	0.000983045	8.04566e-05	0.0011098	0.000509906	0.846251	0.718822	0.701454	0.652011	1
COG0768	Cell division protein FtsI/penicillin-binding protein 2	0.00219572	0.000127995	0.00209185	0.000726083	0.911755	0.838079	0.842259	0.923119	1
COG0769	UDP-N-acetylmuramyl tripeptide synthase	0.000796725	7.72687e-05	0.00155559	0.00069979	0.343891	0.123532	0.0603199	0.0982581	1
COG0770	UDP-N-acetylmuramyl pentapeptide synthase	0.000812373	4.69783e-05	0.000507825	9.67693e-05	0.0174966	0.00805506	0.0103721	0.448523	0.319995
COG0771	UDP-N-acetylmuramoylalanine-D-glutamate ligase	0.000758794	4.72019e-05	0.000467737	0.000109655	0.0343502	0.014186	0.0174612	0.825175	0.490301
COG0773	UDP-N-acetylmuramate-alanine ligase	0.000606541	4.36266e-05	0.000686384	0.000179621	0.732643	0.555121	0.591301	0.602087	1
COG0775	Nucleoside phosphorylase	0.000609303	3.82567e-05	0.000540345	3.70985e-05	0.256094	0.298974	0.29306	0.821372	1
COG0777	Acetyl-CoA carboxylase beta subunit	0.000298207	1.8033e-05	0.000319179	0.000101623	0.872217	0.768617	0.71393	0.649848	1
COG0778	Nitroreductase	0.00171628	5.86226e-05	0.00116996	0.000214649	0.0332914	0.00624675	0.0102415	0.89571	0.480673
COG0779	Uncharacterized protein conserved in bacteria	0.000286665	2.04793e-05	0.000208095	3.14072e-05	0.0614543	0.0580585	0.0467812	0.957436	0.700265
COG0780	Enzyme related to GTP cyclohydrolase I	0.000213226	3.44348e-05	8.30593e-05	1.29147e-05	0.00576185	0.0333855	0.00927104	0.441371	0.147814
COG0781	Transcription termination factor	0.000415782	2.48012e-05	0.000252007	2.20379e-05	0.00074538	0.00195593	0.00171918	0.778632	0.0421009
COG0782	Transcription elongation factor	0.000369914	4.04122e-05	0.000445677	9.67169e-05	0.561317	0.401726	0.420691	0.550565	1
COG0783	DNA-binding ferritin-like protein (oxidative damage protectant)	8.40625e-05	2.11561e-05	0.000762514	0.000524114	0.256576	0.0647059	0.00287391	0.00057821	1
COG0785	Cytochrome c biogenesis protein	3.95907e-05	1.08641e-05	0.000118406	1.0779e-05	0.00060356	0.00111087	0.0233796	0.0702436	0.0382627
COG0786	Na+/glutamate symporter	0.000300776	4.14914e-05	0.000186524	7.50826e-05	0.24209	0.177549	0.186561	0.781467	1
COG0787	Alanine racemase	0.000664719	7.07183e-05	0.000587928	7.66356e-05	0.553639	0.531577	0.522541	0.872502	1
COG0788	Formyltetrahydrofolate hydrolase	7.90017e-05	2.6332e-05	2.01477e-05	2.01477e-05	0.110646	0.192706	0.131225	0.199952	1
COG0789	Predicted transcriptional regulators	0.000989929	6.62356e-05	0.00223699	0.000280016	0.00175461	7.31556e-05	5.86418e-05	0.132476	0.0675149
COG0790	FOG: TPR repeat, SEL1 subfamily	0.00072576	8.49205e-05	0.000169165	5.0536e-05	0.000359497	0.00163655	0.000210924	0.145881	0.034918
COG0791	Cell wall-associated hydrolases (invasion-associated proteins)	0.00112649	9.32217e-05	0.00122309	0.000177633	0.702897	0.605304	0.592942	0.667708	1
COG0792	Predicted endonuclease distantly related to archaeal Holliday junction resolvase	0.000298002	3.44267e-05	0.000227079	4.75231e-05	0.289494	0.26774	0.287171	0.942723	1
COG0793	Periplasmic protease	0.00146457	0.000116458	0.00033346	3.93368e-05	9.89443e-06	6.18822e-05	1.2508e-06	0.116882	0.00722442
COG0794	Predicted sugar phosphate isomerase involved in capsule formation	0.000260211	1.64783e-05	0.000427769	8.44e-05	0.080323	0.0156971	0.00669504	0.296867	0.837525
COG0796	Glutamate racemase	0.000565512	4.00954e-05	0.000365235	5.7744e-05	0.0170679	0.0172512	0.0118199	0.737273	0.31555
COG0797	Lipoproteins	8.82491e-05	2.86552e-05	0.000119295	4.45271e-05	0.641241	0.563838	0.576643	0.463447	1
COG0798	Arsenite efflux pump ACR3 and related permeases	7.80909e-05	2.28787e-05	0.000115546	3.69166e-05	0.484698	0.392895	0.44956	0.371694	1
COG0800	2-keto-3-deoxy-6-phosphogluconate aldolase	0.000462175	6.27697e-05	0.000472345	7.50774e-05	0.93535	0.926263	0.900583	0.739479	1
COG0801	7,8-dihydro-6-hydroxymethylpterin-pyrophosphokinase	0.00036133	3.68346e-05	0.000228922	2.19238e-05	0.0117315	0.0441518	0.0247289	0.693134	0.242162
COG0802	Predicted ATPase or kinase	0.000474252	3.97731e-05	0.000264202	2.16861e-05	0.00111477	0.00644244	0.00311506	0.563488	0.05333
COG0803	ABC-type metal ion transport system, periplasmic component/surface adhesin	0.000473667	4.7137e-05	0.000694209	0.000148877	0.213706	0.0890544	0.0966465	0.377484	1
COG0804	Urea amidohydrolase (urease) alpha subunit	2.38252e-05	8.46265e-06	0.000126661	8.71377e-05	0.302855	0.0945767	0.0314604	0.00379319	1
COG0806	RimM protein, required for 16S rRNA processing	0.000488151	4.1711e-05	0.000747986	0.000407154	0.612637	0.345234	0.28102	0.335372	1
COG0807	GTP cyclohydrolase II	0.00049556	4.24695e-05	0.000199215	5.11524e-05	0.00147757	0.00184221	0.00120234	0.282911	0.061518
COG0810	Periplasmic protein TonB, links inner and outer membranes	0.0007061	0.00010874	0.000219725	0.000109615	0.0105705	0.0210137	0.0133552	0.15813	0.228554
COG0811	Biopolymer transport proteins	0.000590889	7.74622e-05	0.000171061	9.88685e-05	0.00770776	0.00964086	0.0122879	0.135834	0.182072
COG0812	UDP-N-acetylmuramate dehydrogenase	0.000639941	5.73721e-05	0.000592747	0.0001061	0.757023	0.677606	0.644031	0.886237	1
COG0813	Purine-nucleoside phosphorylase	0.000273057	5.92869e-05	0.000118714	4.76219e-05	0.0685057	0.135912	0.0800773	0.317386	0.753441
COG0814	Amino acid permeases	8.30093e-05	3.0282e-05	0.000797039	0.000431986	0.138423	0.0248925	0.00511579	3.62245e-05	1
COG0815	Apolipoprotein N-acyltransferase	6.38612e-05	2.65363e-05	0.000127769	7.88949e-05	0.535401	0.340623	0.365171	0.155251	1
COG0817	Holliday junction resolvasome, endonuclease subunit	0.000380297	4.4633e-05	0.000219871	7.98645e-05	0.115019	0.0856922	0.0745278	0.519284	1
COG0819	Putative transcription activator	0.000101109	2.04411e-05	0.000257533	0.000138863	0.328063	0.119458	0.0716948	0.0601661	1
COG0820	Predicted Fe-S-cluster redox enzyme	0.000725954	3.66377e-05	0.000403954	7.80994e-05	0.00419524	0.00123035	0.00168185	0.485384	0.116777
COG0822	NifU homolog involved in Fe-S cluster formation	0.000738007	5.38678e-05	0.000378775	6.27705e-05	0.00173812	0.00240517	0.00145816	0.411393	0.0675149
COG0823	Periplasmic component of the Tol biopolymer transport system	0.00045398	7.65015e-05	0.000190438	0.000125509	0.10747	0.0895539	0.105422	0.246726	1
COG0824	Predicted thioesterase	0.000428212	3.57009e-05	0.000193839	7.41108e-05	0.0170646	0.00763124	0.0141087	0.295664	0.31555
COG0825	Acetyl-CoA carboxylase alpha subunit	0.00031587	3.80709e-05	0.000146357	5.91994e-05	0.036329	0.0325294	0.0344727	0.312903	0.507855
COG0827	Adenine-specific DNA methylase	0.000682501	5.68552e-05	0.000298634	0.000162854	0.0495612	0.015679	0.0451212	0.267978	0.610159
COG0828	Ribosomal protein S21	0.000108741	2.50065e-05	9.85238e-05	6.42287e-05	0.906475	0.857806	0.88528	0.93136	1
COG0830	Urease accessory protein UreF	1.75298e-05	8.62335e-06	0.000108957	6.42436e-05	0.21431	0.0542693	0.046068	0.000614538	1
COG0833	Amino acid transporters	7.67529e-05	2.22092e-05	0.000492738	7.55978e-05	0.000521106	1.95222e-05	0.00152601	0.0001962	0.0366394
COG0834	ABC-type amino acid transport/signal transduction systems, periplasmic component/domain	0.00150496	9.65789e-05	0.00275009	0.000693952	0.110316	0.0204439	0.00827454	0.173379	1
COG0835	Chemotaxis signal transduction protein	0.000108568	3.20008e-05	0.000112638	6.56885e-05	0.96468	0.950572	0.925399	0.757706	1
COG0836	Mannose-1-phosphate guanylyltransferase	0.000403251	4.41544e-05	0.000166597	4.91514e-05	0.00540895	0.00885828	0.00439724	0.189483	0.141048
COG0837	Glucokinase	1.45922e-05	4.77663e-06	9.65867e-05	5.62255e-05	0.197865	0.0439403	0.00819522	0.000408334	1
COG0838	NADH:ubiquinone oxidoreductase subunit 3 (chain A)	0.000112648	1.82588e-05	5.28694e-05	1.8061e-05	0.04155	0.0739466	0.0659837	0.296129	0.552368
COG0839	NADH:ubiquinone oxidoreductase subunit 6 (chain J)	9.53905e-05	1.95447e-05	9.59876e-05	5.31357e-05	0.993193	0.989624	0.932655	0.809223	1
COG0840	Methyl-accepting chemotaxis protein	0.000821191	0.000128685	0.00145198	0.000635416	0.430312	0.18421	0.144588	0.176329	1
COG0841	Cation/multidrug efflux pump	0.00295604	0.000245864	0.00141916	0.000941627	0.154686	0.0509062	0.120461	0.260719	1
COG0842	ABC-type multidrug transport system, permease component	0.000852501	0.000123643	0.000996922	0.000117364	0.493673	0.493423	0.517272	0.601049	1
COG0843	Heme/copper-type cytochrome/quinol oxidases, subunit 1	1.28502e-05	8.50513e-06	0.000159285	7.5245e-05	0.0829813	0.0123367	0.0313077	6.44628e-07	0.857077
COG0845	Membrane-fusion protein	0.00353792	0.000337904	0.00166909	0.000809607	0.0579912	0.0259727	0.0483695	0.226702	0.673745
COG0846	NAD-dependent protein deacetylases, SIR2 family	0.000836023	6.75656e-05	0.000543179	6.36598e-05	0.0105145	0.0233563	0.0141613	0.531114	0.228382
COG0847	DNA polymerase III, epsilon subunit and related 3'-5' exonucleases	0.000515748	4.72855e-05	0.00061645	0.000111867	0.502577	0.34048	0.351272	0.57437	1
COG0848	Biopolymer transport protein	0.000300757	4.06623e-05	0.000194678	9.99077e-05	0.425497	0.256081	0.298719	0.524517	1
COG0849	Actin-like ATPase involved in cell division	0.000246822	3.27729e-05	0.000197936	8.6324e-05	0.674783	0.522379	0.553554	0.821385	1
COG0851	Septum formation topological specificity factor	3.89144e-05	1.45171e-05	6.47601e-05	3.74575e-05	0.607485	0.442151	0.448296	0.241828	1
COG0856	Orotate phosphoribosyltransferase homologs	0	0	0	0	1	NaN	0.999996	1	1
COG0857	BioD-like N-terminal domain of phosphotransacetylase	1.51925e-05	4.52704e-06	5.92963e-05	3.29346e-05	0.244128	0.0681768	0.028162	0.00431457	1
COG0858	Ribosome-binding factor A	0.000487786	6.01916e-05	0.000382531	3.98146e-05	0.196216	0.295628	0.24672	0.748162	1
COG0859	ADP-heptose:LPS heptosyltransferase	0.000303148	4.5139e-05	0.000465661	0.000232095	0.581591	0.335502	0.285931	0.261694	1
COG0860	N-acetylmuramoyl-L-alanine amidase	0.000996731	5.66068e-05	0.000471847	0.000205766	0.0330903	0.00624798	0.0241819	0.192048	0.479132
COG0861	Membrane protein TerC, possibly involved in tellurium resistance	9.41614e-05	2.3392e-05	0.000656703	0.000193853	0.016184	0.00100521	0.000702686	0.00319414	0.307235
COG0863	DNA modification methylase	0.00072122	5.43672e-05	0.000500151	0.000129811	0.156741	0.0848164	0.101584	0.917546	1
COG0864	Predicted transcriptional regulators containing the CopG/Arc/MetJ DNA-binding domain and a metal-binding domain	5.42291e-05	1.94519e-05	8.02583e-05	4.74888e-05	0.687643	0.550126	0.553114	0.367493	1
COG1001	Adenine deaminase	0.000379561	4.32711e-05	0.000349412	0.000113542	0.844717	0.762911	0.806775	0.797171	1
COG1002	Type II restriction enzyme, methylase subunits	0.000205782	3.62449e-05	0.000315622	0.000227241	0.705634	0.488129	0.454584	0.358604	1
COG1003	Glycine cleavage system protein P (pyridoxal-binding), C-terminal domain	0.000215776	3.66036e-05	6.9959e-05	2.84231e-05	0.0106398	0.0311205	0.0132082	0.331741	0.228632
COG1004	Predicted UDP-glucose 6-dehydrogenase	0.00064877	6.2264e-05	0.000617384	0.000259691	0.926626	0.871137	0.875941	0.779106	1
COG1005	NADH:ubiquinone oxidoreductase subunit 1 (chain H)	0.000158206	3.22527e-05	0.000117934	5.37462e-05	0.607874	0.515751	0.54395	0.984635	1
COG1006	Multisubunit Na+/H+ antiporter, MnhC subunit	3.2936e-05	1.13284e-05	1.68819e-05	1.68819e-05	0.523814	0.447629	0.453432	0.626365	1
COG1007	NADH:ubiquinone oxidoreductase subunit 2 (chain N)	0.000195438	2.86053e-05	0.000135287	8.33744e-05	0.584388	0.397688	0.452549	0.856787	1
COG1008	NADH:ubiquinone oxidoreductase subunit 4 (chain M)	0.000183336	2.83691e-05	0.000125778	5.11319e-05	0.425144	0.310591	0.331049	0.847382	1
COG1009	NADH:ubiquinone oxidoreductase subunit 5 (chain L)/Multisubunit Na+/H+ antiporter, MnhA subunit	0.000203905	2.34319e-05	0.000200994	0.000114587	0.983971	0.971771	0.987855	0.74151	1
COG1010	Precorrin-3B methylase	0.000380991	5.34669e-05	0.000100416	4.27574e-05	0.00240105	0.00780784	0.00274294	0.180821	0.0825027
COG1011	Predicted hydrolase (HAD superfamily)	0.00105119	6.38493e-05	0.00104475	0.000251101	0.983991	0.972938	0.924902	0.759333	1
COG1012	NAD-dependent aldehyde dehydrogenases	0.000909897	9.29611e-05	0.0024859	0.000993563	0.154663	0.0314899	0.005863	0.0719143	1
COG1013	Pyruvate:ferredoxin oxidoreductase and related 2-oxoacid:ferredoxin oxidoreductases, beta subunit	0.000794331	4.21395e-05	0.000278611	4.99459e-05	2.63851e-05	1.8316e-05	1.2203e-05	0.303373	0.0108366
COG1014	Pyruvate:ferredoxin oxidoreductase and related 2-oxoacid:ferredoxin oxidoreductases, gamma subunit	0.0010173	7.58301e-05	0.00020699	7.20273e-05	2.96833e-05	4.5484e-05	3.20615e-05	0.087171	0.0108366
COG1015	Phosphopentomutase	0.000330676	4.48176e-05	0.000349566	5.8031e-05	0.838556	0.812959	0.836807	0.706106	1
COG1017	Hemoglobin-like flavoprotein	2.46179e-06	2.46179e-06	3.04151e-05	1.84122e-05	0.177526	0.0421262	0.110617	0.000924619	1
COG1018	Flavodoxin reductases (ferredoxin-NADPH reductases) family 1	4.01395e-05	1.50845e-05	0.00036174	0.00028222	0.318254	0.0992805	0.013542	0.000309481	1
COG1019	Predicted nucleotidyltransferase	0	0	0	0	1	NaN	0.999996	1	1
COG1020	Non-ribosomal peptide synthetase modules and related proteins	0.000425129	3.98516e-05	0.000580766	0.000186977	0.510473	0.26456	0.211976	0.439872	1
COG1021	Peptide arylation enzymes	1.95642e-05	8.10116e-06	0.000125037	7.47484e-05	0.217001	0.0525132	0.0247162	0.00214154	1
COG1022	Long-chain acyl-CoA synthetases (AMP-forming)	0.000975803	0.000123895	0.00176351	0.00093139	0.498013	0.226485	0.15301	0.225925	1
COG1023	Predicted 6-phosphogluconate dehydrogenase	3.23582e-05	9.93991e-06	0.00011383	3.84168e-05	0.0657913	0.0156851	0.0310148	0.0240425	0.730396
COG1024	Enoyl-CoA hydratase/carnithine racemase	0.000343744	4.37465e-05	0.0003796	0.000210263	0.895023	0.81318	0.786231	0.657288	1
COG1025	Secreted/periplasmic Zn-dependent peptidases, insulinase-like	1.5175e-05	1.07559e-05	0.000185203	0.000130052	0.252773	0.0659301	0.0522029	3.87101e-05	1
COG1026	Predicted Zn-dependent peptidases, insulinase-like	0.000429311	7.1801e-05	0.000144579	5.64725e-05	0.0112599	0.0319107	0.0122388	0.209341	0.236418
COG1027	Aspartate ammonia-lyase	0.00027761	3.49714e-05	0.000657073	0.000262863	0.207113	0.0512542	0.0209426	0.087776	1
COG1028	Dehydrogenases with different specificities (related to short-chain alcohol dehydrogenases)	0.00341826	0.000139741	0.00372506	0.00144213	0.866758	0.747757	0.733097	0.684686	1
COG1029	Formylmethanofuran dehydrogenase subunit B	0	0	0	0	1	NaN	0.999996	1	1
COG1030	Membrane-bound serine protease (ClpP class)	4.91728e-05	9.58928e-06	1.68819e-05	1.68819e-05	0.135095	0.102923	0.159186	0.248563	1
COG1031	Uncharacterized Fe-S oxidoreductase	0	0	0	0	1	NaN	0.999996	1	1
COG1032	Fe-S oxidoreductase	0.00150519	4.09876e-05	0.000593678	0.000212922	0.00204485	7.01411e-05	0.00172918	0.238832	0.0748931
COG1033	Predicted exporters of the RND superfamily	0.000396542	5.33344e-05	7.6523e-05	4.44182e-05	0.00117744	0.00353177	0.00225104	0.0382301	0.0547852
COG1034	NADH dehydrogenase/NADH:ubiquinone oxidoreductase 75 kD subunit (chain G)	0.000392685	4.352e-05	0.000357243	0.00010813	0.809849	0.717039	0.77312	0.902525	1
COG1035	Coenzyme F420-reducing hydrogenase, beta subunit	0.000351224	4.46718e-05	6.28743e-05	2.17709e-05	0.000273746	0.00170704	0.000175265	0.0231404	0.0313058
COG1036	Archaeal flavoproteins	0	0	0	0	1	NaN	0.999996	1	1
COG1038	Pyruvate carboxylase	0.000391166	2.77795e-05	0.000192669	6.20906e-05	0.0152011	0.00559111	0.0113863	0.373429	0.292082
COG1039	Ribonuclease HIII	1.43552e-05	7.29687e-06	4.59013e-05	3.19892e-05	0.435751	0.197515	0.230454	0.0431071	1
COG1040	Predicted amidophosphoribosyltransferases	0.000286505	1.79534e-05	0.000156211	5.89804e-05	0.0596997	0.0166179	0.0390774	0.436248	0.688538
COG1041	Predicted DNA modification methylase	9.28556e-06	6.14507e-06	0	0	0.1734	0.346802	0.996705	0.0311904	1
COG1042	Acyl-CoA synthetase (NDP forming)	0.000243901	3.53026e-05	0.000171154	8.29856e-05	0.514325	0.354287	0.39818	0.729321	1
COG1043	Acyl-[acyl carrier protein]--UDP-N-acetylglucosamine O-acyltransferase	0.000378608	4.63018e-05	9.34593e-05	5.97632e-05	0.00397096	0.00460148	0.00870793	0.0554536	0.112179
COG1044	UDP-3-O-[3-hydroxymyristoyl] glucosamine N-acyltransferase	0.000237367	4.08244e-05	0.000209557	0.000140719	0.880802	0.802181	0.82328	0.921596	1
COG1045	Serine acetyltransferase	0.00056619	4.73701e-05	0.000384602	6.73459e-05	0.0512136	0.0540335	0.0560327	0.647032	0.620839
COG1047	FKBP-type peptidyl-prolyl cis-trans isomerases 2	0.00018943	3.11277e-05	0.0002055	9.0222e-05	0.894262	0.83237	0.785243	0.684952	1
COG1048	Aconitase A	0.000799829	6.79672e-05	0.000598536	6.2216e-05	0.0530044	0.0985749	0.0729469	0.766996	0.634446
COG1049	Aconitase B	1.69503e-05	1.00802e-05	0.000113294	8.7444e-05	0.336463	0.119262	0.0879088	0.000263255	1
COG1051	ADP-ribose pyrophosphatase	0.00048491	4.37948e-05	0.00040437	0.000111264	0.589817	0.424046	0.404399	0.905468	1
COG1052	Lactate dehydrogenase and related dehydrogenases	0.000930222	6.59773e-05	0.000366715	9.52262e-05	0.000801449	0.000565661	0.000596389	0.158382	0.0429792
COG1053	Succinate dehydrogenase/fumarate reductase, flavoprotein subunit	0.00109785	9.54429e-05	0.0014909	0.000360908	0.354089	0.173249	0.153195	0.418407	1
COG1054	Predicted sulfurtransferase	1.06014e-05	7.02569e-06	9.92626e-05	2.81198e-05	0.0122163	0.00128841	0.0451337	1.71292e-05	0.248569
COG1055	Na+/H+ antiporter NhaD and related arsenite permeases	0.00033119	6.33766e-05	0.00012103	6.08087e-05	0.0371767	0.0698012	0.0430534	0.11749	0.514401
COG1056	Nicotinamide mononucleotide adenylyltransferase	1.65911e-05	6.26353e-06	5.32427e-05	2.90071e-05	0.279616	0.102758	0.0956108	0.0217995	1
COG1057	Nicotinic acid mononucleotide adenylyltransferase	0.000479824	4.34925e-05	0.000261283	6.56871e-05	0.0194887	0.0178391	0.0123055	0.357655	0.349072
COG1058	Predicted nucleotide-utilizing enzyme related to molybdopterin-biosynthesis enzyme MoeA	0.000225394	2.25714e-05	0.000137732	5.69543e-05	0.20714	0.106225	0.150497	0.468136	1
COG1059	Thermostable 8-oxoguanine DNA glycosylase	0	0	0	0	1	NaN	0.999996	1	1
COG1060	Thiamine biosynthesis enzyme ThiH and related uncharacterized enzymes	0.000608439	4.71147e-05	0.00028073	0.000108619	0.0197031	0.00714724	0.0152431	0.212513	0.350461
COG1061	DNA or RNA helicases of superfamily II	0.000595087	5.39261e-05	0.00048846	0.000160033	0.614856	0.430339	0.474055	0.856547	1
COG1062	Zn-dependent alcohol dehydrogenases, class III	7.84897e-06	5.21651e-06	8.81736e-05	6.75659e-05	0.298894	0.089644	0.0474109	3.32626e-06	1
COG1063	Threonine dehydrogenase and related Zn-dependent dehydrogenases	0.0011061	5.95231e-05	0.00192772	0.000200479	0.00312334	0.000259969	0.000208201	0.163953	0.0978436
COG1064	Zn-dependent alcohol dehydrogenases	4.93953e-05	1.46035e-05	0.000312721	0.000153961	0.126471	0.0224131	0.00563988	4.17902e-05	1
COG1066	Predicted ATP-dependent serine protease	0.0012973	5.70956e-05	0.000952463	0.000318935	0.349613	0.142954	0.188433	0.665806	1
COG1067	Predicted ATP-dependent protease	7.78754e-05	2.2644e-05	0.000142022	0.000102782	0.627547	0.40024	0.357962	0.137933	1
COG1069	Ribulose kinase	7.6191e-05	1.89596e-05	0.000254085	9.29803e-05	0.0930538	0.0196824	0.0194165	0.00452937	0.93431
COG1070	Sugar (pentulose and hexulose) kinases	0.00153845	7.23114e-05	0.00187829	0.00030128	0.3355	0.149595	0.12666	0.530778	1
COG1071	Pyruvate/2-oxoglutarate dehydrogenase complex, dehydrogenase (E1) component, eukaryotic type, alpha subunit	7.58433e-05	2.23158e-05	9.36712e-05	5.25078e-05	0.804753	0.714972	0.756373	0.564159	1
COG1072	Panthothenate kinase	7.47231e-06	5.29924e-06	0.000230076	3.69554e-05	0.000247361	1.97527e-06	0.00633738	5.58837e-06	0.0313058
COG1073	Hydrolases of the alpha/beta superfamily	0.00104003	6.55596e-05	0.00106048	0.000314609	0.959654	0.928173	0.905186	0.700959	1
COG1074	ATP-dependent exoDNAse (exonuclease V) beta subunit (contains helicase and exonuclease domains)	0.000932937	2.69178e-05	0.000398079	6.22295e-05	2.63851e-05	1.36822e-06	4.87969e-06	0.510218	0.0108366
COG1075	Predicted acetyltransferases and hydrolases with the alpha/beta hydrolase fold	0.000103033	3.49721e-05	7.97343e-05	3.00626e-05	0.689137	0.690478	0.645733	0.885792	1
COG1076	DnaJ-domain-containing proteins 1	9.64283e-05	1.81309e-05	0.000134502	9.49772e-05	0.755479	0.574537	0.514521	0.411097	1
COG1077	Actin-like ATPase involved in cell morphogenesis	0.000729521	4.42563e-05	0.000281006	7.57595e-05	0.000616753	0.000215605	0.000424359	0.409257	0.0382627
COG1078	HD superfamily phosphohydrolases	0.000118668	2.82569e-05	1.54017e-05	1.54017e-05	0.00949205	0.0405539	0.0175053	0.0687427	0.21051
COG1079	Uncharacterized ABC-type transport system, permease component	0.000443136	7.10619e-05	0.000273218	0.000106492	0.243851	0.211493	0.197364	0.78326	1
COG1080	Phosphoenolpyruvate-protein kinase (PTS system EI component in bacteria)	0.000629804	5.37949e-05	0.000672409	0.000140467	0.822827	0.731165	0.789002	0.676464	1
COG1082	Sugar phosphate isomerases/epimerases	0.00101604	8.82346e-05	0.00102255	0.000261195	0.984792	0.976123	0.941143	0.739011	1
COG1083	CMP-N-acetylneuraminic acid synthetase	0.000190662	2.56324e-05	2.47465e-05	8.2796e-06	0.000220976	0.0015519	0.000150252	0.0535995	0.0313058
COG1084	Predicted GTPase	0	0	0	0	1	NaN	0.999996	1	1
COG1085	Galactose-1-phosphate uridylyltransferase	9.44836e-05	1.91079e-05	0.000360173	9.60064e-05	0.0214841	0.00222147	0.00274095	0.0214884	0.368763
COG1086	Predicted nucleoside-diphosphate sugar epimerases	0.000868696	7.21712e-05	0.000198434	5.50495e-05	5.27703e-05	0.000125098	3.57241e-05	0.12515	0.0156529
COG1087	UDP-glucose 4-epimerase	0.000755234	4.30596e-05	0.00193433	0.001044	0.322301	0.100935	0.0218483	0.0867358	1
COG1088	dTDP-D-glucose 4,6-dehydratase	0.000630806	4.38666e-05	0.000643793	0.000150031	0.947619	0.91274	0.871137	0.733494	1
COG1089	GDP-D-mannose dehydratase	0.000324448	4.91712e-05	5.1135e-05	1.84596e-05	0.000577175	0.0043667	0.000245384	0.0479315	0.0382627
COG1090	Predicted nucleoside-diphosphate sugar epimerase	2.19826e-05	5.97254e-06	0.000103571	4.51335e-05	0.107605	0.0192384	0.00677773	0.00911059	1
COG1091	dTDP-4-dehydrorhamnose reductase	0.000614662	4.59099e-05	0.000869659	0.000429895	0.639358	0.380167	0.318624	0.413023	1
COG1092	Predicted SAM-dependent methyltransferases	0.000793215	3.51246e-05	0.000279836	0.000120018	0.00237796	0.000175638	0.00275463	0.272014	0.0823777
COG1093	Translation initiation factor 2, alpha subunit (eIF-2alpha)	0	0	0	0	1	NaN	0.999996	1	1
COG1094	Predicted RNA-binding protein (contains KH domains)	0	0	0	0	1	NaN	0.999996	1	1
COG1095	DNA-directed RNA polymerase, subunit E'	0	0	0	0	1	NaN	0.999996	1	1
COG1096	Predicted RNA-binding protein (consists of S1 domain and a Zn-ribbon domain)	0	0	0	0	1	NaN	0.999996	1	1
COG1097	RNA-binding protein Rrp4 and related proteins (contain S1 domain and KH domain)	0	0	0	0	1	NaN	0.999996	1	1
COG1098	Predicted RNA binding protein (contains ribosomal protein S1 domain)	8.37301e-05	2.64309e-05	6.78444e-05	6.78444e-05	0.862771	0.792241	0.758535	0.852606	1
COG1099	Predicted metal-dependent hydrolases with the TIM-barrel fold	0	0	0	0	1	NaN	0.999996	1	1
COG1100	GTPase SAR1 and related small G proteins	3.00933e-06	2.10904e-06	0	0	0.351417	0.373273	0.996894	0.206169	1
COG1101	ABC-type uncharacterized transport system, ATPase component	0.00052496	5.16722e-05	0.000219389	0.000103466	0.024238	0.0125627	0.0240073	0.292285	0.396594
COG1102	Cytidylate kinase	0.000602449	6.85643e-05	0.000144998	0.000104925	0.00477241	0.00362301	0.0133243	0.0766998	0.12995
COG1103	Archaea-specific pyridoxal phosphate-dependent enzymes	0	0	0	0	1	NaN	0.999996	1	1
COG1104	Cysteine sulfinate desulfinase/cysteine desulfurase and related enzymes	0.000741642	8.869e-05	0.000585522	0.000120355	0.357687	0.338086	0.303609	0.900227	1
COG1105	Fructose-1-phosphate kinase and related fructose-6-phosphate kinase (PfkB)	0.000378863	5.41079e-05	0.000458806	6.8251e-05	0.456935	0.411115	0.455481	0.56527	1
COG1106	Predicted ATPases	0.000431406	4.68791e-05	0.000159212	5.79827e-05	0.00476911	0.00623833	0.00440625	0.198162	0.12995
COG1107	Archaea-specific RecJ-like exonuclease, contains DnaJ-type Zn finger domain	0	0	0	0	1	NaN	0.999996	1	1
COG1108	ABC-type Mn2+/Zn2+ transport systems, permease components	0.000441016	2.83005e-05	0.000825951	0.000168693	0.0474306	0.00633305	0.00248482	0.179784	0.593943
COG1109	Phosphomannomutase	0.00170232	7.89892e-05	0.000989653	0.000139154	0.00148416	0.000586052	0.000639371	0.510032	0.061518
COG1110	Reverse gyrase	0	0	0	0	1	NaN	0.999996	1	1
COG1111	ERCC4-like helicases	1.67728e-06	1.67728e-06	0	0	1	0.528757	0.997001	0.107893	1
COG1112	Superfamily I DNA and RNA helicases and helicase subunits	0.000871608	8.20477e-05	9.1767e-05	4.54341e-05	1.97889e-05	8.5488e-05	2.92821e-05	0.0034296	0.0108366
COG1113	Gamma-aminobutyrate permease and related permeases	0.000177965	5.13571e-05	0.00183384	0.000286255	0.000343007	3.92328e-06	0.000291276	4.25824e-06	0.034918
COG1114	Branched-chain amino acid permeases	0.000233668	3.97518e-05	0.000293186	5.76071e-05	0.491812	0.419772	0.441117	0.521996	1
COG1115	Na+/alanine symporter	0.00116616	0.000103226	0.000400228	0.000119421	0.000811343	0.00112868	0.000731222	0.129543	0.0431324
COG1116	ABC-type nitrate/sulfonate/bicarbonate transport system, ATPase component	0.000551512	6.64887e-05	0.000851499	0.000161411	0.123433	0.0612288	0.0728304	0.303286	1
COG1117	ABC-type phosphate transport system, ATPase component	0.000598192	5.26098e-05	0.000566611	0.000156014	0.87946	0.808204	0.74273	0.891225	1
COG1118	ABC-type sulfate/molybdate transport systems, ATPase component	0.000170552	2.95357e-05	0.000229784	9.86208e-05	0.647524	0.456625	0.415249	0.430936	1
COG1119	ABC-type molybdenum transport system, ATPase component/photorepair protein PhrA	0.000219422	2.59606e-05	0.00039227	0.000112677	0.181286	0.056727	0.0505735	0.185977	1
COG1120	ABC-type cobalamin/Fe3+-siderophores transport systems, ATPase components	0.000819514	8.94972e-05	0.00105756	0.000291085	0.528197	0.320299	0.296105	0.480692	1
COG1121	ABC-type Mn/Zn transport systems, ATPase component	0.000448155	3.56562e-05	0.000470592	2.74696e-05	0.693273	0.703675	0.680888	0.758399	1
COG1122	ABC-type cobalt transport system, ATPase component	0.00182065	0.000187745	0.00166211	0.000377112	0.765885	0.67923	0.672456	0.965221	1
COG1123	ATPase components of various ABC-type transport systems, contain duplicated ATPase	0.000230662	2.8598e-05	0.00129308	0.000402888	0.0246866	0.00164593	5.7325e-05	0.000230596	0.400554
COG1124	ABC-type dipeptide/oligopeptide/nickel transport system, ATPase component	0.000115125	2.4423e-05	0.000210696	0.000127061	0.551641	0.301456	0.241615	0.166544	1
COG1125	ABC-type proline/glycine betaine transport systems, ATPase components	7.51443e-05	2.4739e-05	0.000380988	5.15124e-05	0.000465038	7.44841e-05	0.00793817	0.000432741	0.0355977
COG1126	ABC-type polar amino acid transport system, ATPase component	0.00160809	0.000174516	0.00180257	0.000203651	0.55985	0.526311	0.556131	0.66124	1
COG1127	ABC-type transport system involved in resistance to organic solvents, ATPase component	0.000289498	4.2593e-05	0.000130121	4.96488e-05	0.0345085	0.0502867	0.0390794	0.214168	0.491271
COG1129	ABC-type sugar transport system, ATPase component	0.00125744	8.90807e-05	0.00275647	0.000305607	0.000996039	5.36828e-05	7.67251e-05	0.0679072	0.0492414
COG1131	ABC-type multidrug transport system, ATPase component	0.00352352	0.000234032	0.00324798	0.00112661	0.849763	0.73493	0.742571	0.971622	1
COG1132	ABC-type multidrug transport system, ATPase and permease components	0.00772422	0.000427407	0.00558282	0.00134982	0.17153	0.0711368	0.0890109	0.654454	1
COG1133	ABC-type long-chain fatty acid transport system, fused permease and ATPase components	9.29572e-06	4.82546e-06	0.000126338	9.2135e-05	0.266839	0.0698982	0.012683	3.47942e-07	1
COG1134	ABC-type polysaccharide/polyol phosphate transport system, ATPase component	0.000512382	5.18508e-05	0.00095621	0.000460379	0.437466	0.16676	0.0937193	0.129612	1
COG1135	ABC-type metal ion transport system, ATPase component	0.00031456	3.00314e-05	0.00110456	0.000361014	0.0534035	0.00576095	0.000433607	0.00299185	0.637772
COG1136	ABC-type antimicrobial peptide transport system, ATPase component	0.00406876	0.000249348	0.00506427	0.00178042	0.66044	0.417368	0.382696	0.507023	1
COG1137	ABC-type (unclassified) transport system, ATPase component	0.000202157	2.31578e-05	0.000195559	0.000104044	0.960653	0.930908	0.983398	0.85649	1
COG1138	Cytochrome c biogenesis factor	4.64325e-05	1.74325e-05	0.000180388	0.000112495	0.302077	0.103761	0.0736963	0.0022033	1
COG1139	Uncharacterized conserved protein containing a ferredoxin-like domain	0.000265462	5.74227e-05	0.000156153	9.54369e-05	0.426506	0.327564	0.329758	0.786669	1
COG1140	Nitrate reductase beta subunit	4.31818e-05	1.93934e-05	0.000332522	8.11987e-05	0.0063984	0.000471362	0.0135586	0.00257811	0.159405
COG1141	Ferredoxin	2.93618e-05	1.23921e-05	0	0	0.0386048	0.151537	0.996511	0.0196298	0.52953
COG1142	Fe-S-cluster-containing hydrogenase components 2	0.000171766	1.03633e-05	0.000466404	0.000270713	0.339778	0.112198	0.0209044	0.0946857	1
COG1143	Formate hydrogenlyase subunit 6/NADH:ubiquinone oxidoreductase 23 kD subunit (chain I)	0.00016308	1.8359e-05	0.000191578	9.73853e-05	0.819902	0.680247	0.609716	0.578443	1
COG1144	Pyruvate:ferredoxin oxidoreductase and related 2-oxoacid:ferredoxin oxidoreductases, delta subunit	2.71505e-05	1.26592e-05	0	0	0.0565499	0.190536	0.996526	0.0105738	0.663497
COG1145	Ferredoxin	0.00165589	6.36942e-05	0.000496204	0.000154716	8.90498e-05	4.05297e-06	7.13984e-05	0.28989	0.0216733
COG1146	Ferredoxin	0.000273708	4.22141e-05	0.000224729	7.46335e-05	0.650222	0.553023	0.50652	0.90067	1
COG1148	Heterodisulfide reductase, subunit A and related polyferredoxins	0.000100313	3.19394e-05	4.96045e-05	4.73803e-05	0.471634	0.395961	0.389976	0.577992	1
COG1149	MinD superfamily P-loop ATPase containing an inserted ferredoxin domain	3.29672e-05	1.58878e-05	0	0	0.0634727	0.204241	0.996493	0.00680791	0.715535
COG1150	Heterodisulfide reductase, subunit C	2.75083e-05	1.53942e-05	0	0	0.108344	0.269714	0.996522	0.0114237	1
COG1152	CO dehydrogenase/acetyl-CoA synthase alpha subunit	4.95224e-05	1.14677e-05	3.25146e-05	3.25146e-05	0.696192	0.541151	0.587417	0.900587	1
COG1153	Formylmethanofuran dehydrogenase subunit D	0	0	0	0	1	NaN	0.999996	1	1
COG1154	Deoxyxylulose-5-phosphate synthase	0.000964853	6.59335e-05	0.000793321	0.000178988	0.465971	0.281056	0.262552	0.945236	1
COG1155	Archaeal/vacuolar-type H+-ATPase subunit A	0.000508032	3.84755e-05	0.000244375	9.74383e-05	0.0297196	0.0101256	0.0219591	0.522129	0.45278
COG1156	Archaeal/vacuolar-type H+-ATPase subunit B	0.000480496	4.17425e-05	0.00020277	5.73724e-05	0.0031926	0.00307855	0.00289255	0.427332	0.0983897
COG1157	Flagellar biosynthesis/type III secretory pathway ATPase	0.000119062	1.84457e-05	0.000175947	3.73263e-05	0.229702	0.150258	0.203188	0.378051	1
COG1158	Transcription termination factor	0.000445282	5.37988e-05	0.000464652	6.44391e-05	0.855198	0.83721	0.873733	0.710725	1
COG1159	GTPase	0.000650115	3.85696e-05	0.000339007	6.52157e-05	0.00237796	0.0012192	0.00136933	0.560676	0.0823777
COG1160	Predicted GTPases	0.000898835	5.65422e-05	0.000498892	4.39171e-05	0.000379286	0.00108891	0.000510004	0.614935	0.034918
COG1161	Predicted GTPases	0.000298403	2.66408e-05	0.000143717	5.90692e-05	0.0374933	0.0172759	0.0309837	0.467388	0.517774
COG1162	Predicted GTPases	0.000691263	3.80842e-05	0.000240522	5.78636e-05	0.000158311	4.18114e-05	7.54013e-05	0.252137	0.0278274
COG1163	Predicted GTPase	0	0	0	0	1	NaN	0.999996	1	1
COG1164	Oligoendopeptidase F	0.000394494	4.63047e-05	0.000239023	0.000107166	0.242117	0.140724	0.163009	0.678753	1
COG1165	2-succinyl-6-hydroxy-2,4-cyclohexadiene-1-carboxylate synthase	0.000241248	2.59016e-05	0.000169545	6.16595e-05	0.346348	0.223084	0.27453	0.813815	1
COG1166	Arginine decarboxylase (spermidine biosynthesis)	0.000231674	3.2334e-05	0.000115904	7.77054e-05	0.226645	0.124636	0.177563	0.476039	1
COG1167	Transcriptional regulators containing a DNA-binding HTH domain and an aminotransferase domain (MocR family) and their eukaryotic orthologs	0.00110937	7.23793e-05	0.00139747	0.000564693	0.688517	0.454376	0.408727	0.521022	1
COG1168	Bifunctional PLP-dependent enzyme with beta-cystathionase and maltose regulon repressor activities	0.000882203	6.87589e-05	0.000938769	0.000147038	0.782131	0.694595	0.674093	0.703486	1
COG1169	Isochorismate synthase	0.000151544	3.74687e-05	0.000270491	0.000112684	0.377218	0.218859	0.223854	0.22709	1
COG1171	Threonine dehydratase	0.000494364	4.44236e-05	0.000762295	0.00012406	0.0679978	0.0252799	0.0315053	0.329406	0.748761
COG1172	Ribose/xylose/arabinose/galactoside ABC-type transport systems, permease components	0.000625421	8.38688e-05	0.00219797	0.000622913	0.0306793	0.0028441	0.000705517	0.0173549	0.457872
COG1173	ABC-type dipeptide/oligopeptide/nickel transport systems, permease components	0.0011395	0.000102061	0.00222684	0.000212234	0.00116754	0.000259157	0.000927217	0.168829	0.0545924
COG1174	ABC-type proline/glycine betaine transport systems, permease component	6.92076e-05	2.29307e-05	0.000524414	0.000100971	0.0015996	6.02808e-05	0.0022169	0.000202275	0.0643361
COG1175	ABC-type sugar transport systems, permease components	0.00234026	0.000153947	0.00638315	0.00172007	0.0408277	0.00376809	0.000355477	0.0462853	0.548916
COG1176	ABC-type spermidine/putrescine transport system, permease component I	0.00051744	3.08808e-05	0.000439413	0.00014859	0.683906	0.471542	0.525107	0.997223	1
COG1177	ABC-type spermidine/putrescine transport system, permease component II	0.000541977	4.02462e-05	0.000967582	0.00024367	0.122084	0.0256031	0.0137853	0.213575	1
COG1178	ABC-type Fe3+ transport system, permease component	0.000254723	4.67314e-05	0.000496732	0.000284271	0.497165	0.234368	0.166461	0.15594	1
COG1179	Dinucleotide-utilizing enzymes involved in molybdopterin and thiamine biosynthesis family 1	0.000435439	5.471e-05	0.000191878	8.83791e-05	0.0406859	0.0341686	0.0397499	0.298546	0.548563
COG1180	Pyruvate-formate lyase-activating enzyme	0.00084516	5.98944e-05	0.000989781	0.000196831	0.572617	0.368091	0.341274	0.59984	1
COG1181	D-alanine-D-alanine ligase and related ATP-grasp enzymes	0.00062586	5.36333e-05	0.000689176	5.65984e-05	0.511469	0.495343	0.49419	0.677829	1
COG1182	Acyl carrier protein phosphodiesterase	1.84925e-05	7.7022e-06	0.00018518	0.000104004	0.149884	0.0288575	0.00750748	3.16403e-05	1
COG1183	Phosphatidylserine synthase	0.000201647	1.87603e-05	4.92619e-05	3.21143e-05	0.00240764	0.00119325	0.00652058	0.0621535	0.0825027
COG1184	Translation initiation factor 2B subunit, eIF-2B alpha/beta/delta family	9.89794e-06	6.61731e-06	0	0	0.180761	0.351506	0.996696	0.0221654	1
COG1185	Polyribonucleotide nucleotidyltransferase (polynucleotide phosphorylase)	0.000807931	6.63402e-05	0.000497429	9.2184e-05	0.0207849	0.0226686	0.0140938	0.562441	0.36145
COG1186	Protein chain release factor B	0.000585672	5.24425e-05	0.000510161	5.86817e-05	0.436661	0.412441	0.436009	0.992014	1
COG1187	16S rRNA uridine-516 pseudouridylate synthase and related pseudouridylate synthases	0.000888545	8.00571e-05	0.000799002	0.000104482	0.585664	0.53398	0.549016	0.94948	1
COG1188	Ribosome-associated heat shock protein implicated in the recycling of the 50S subunit (S4 paralog)	0.000388142	3.87579e-05	0.000155143	1.52516e-05	0.000375988	0.00264999	0.000580971	0.19587	0.034918
COG1189	Predicted rRNA methylase	0.000372946	4.0119e-05	0.000470763	0.000295177	0.794704	0.626281	0.594012	0.510133	1
COG1190	Lysyl-tRNA synthetase (class II)	0.000739794	8.40703e-05	0.000524189	0.00010169	0.141368	0.162861	0.14235	0.684648	1
COG1191	DNA-directed RNA polymerase specialized sigma subunit	0.00134602	0.000137997	0.00073329	0.000233132	0.0465896	0.0366645	0.0368784	0.391106	0.589308
COG1192	ATPases involved in chromosome partitioning	0.00255325	0.000172385	0.0016636	0.000373901	0.0551251	0.0288236	0.0326548	0.579209	0.652425
COG1193	Mismatch repair ATPase (MutS family)	0.000795489	5.32779e-05	0.000363658	8.78638e-05	0.00205144	0.00111159	0.00145318	0.250135	0.0748931
COG1194	A/G-specific DNA glycosylase	0.000505967	5.11528e-05	0.000939963	0.000615936	0.573016	0.294783	0.1859	0.147255	1
COG1195	Recombinational DNA repair ATPase (RecF pathway)	0.000730128	5.77082e-05	0.000476129	9.74362e-05	0.0479748	0.0380039	0.033257	0.559519	0.596821
COG1196	Chromosome segregation ATPases	0.00167627	9.15067e-05	0.000650527	9.22693e-05	2.63851e-05	3.19035e-05	1.26925e-05	0.138472	0.0108366
COG1197	Transcription-repair coupling factor (superfamily II helicase)	0.00100355	7.99217e-05	0.000825981	0.000192747	0.491539	0.325214	0.30546	0.874465	1
COG1198	Primosomal protein N' (replication factor Y) - superfamily II helicase	0.000828925	3.98988e-05	0.000411996	7.67471e-05	0.000850921	0.000235368	0.000426336	0.265202	0.0434618
COG1199	Rad3-related DNA helicases	0.000484017	3.17083e-05	0.000429534	4.50347e-05	0.422779	0.35439	0.437651	0.979005	1
COG1200	RecG-like helicase	0.000686561	6.6375e-05	0.000829933	0.000322109	0.730334	0.539616	0.544351	0.556399	1
COG1201	Lhr-like helicases	0.000100592	2.92403e-05	0.000368757	0.000126116	0.0639576	0.0133072	0.0230407	0.00381143	0.717702
COG1202	Superfamily II helicase, archaea-specific	0	0	0	0	1	NaN	0.999996	1	1
COG1203	Predicted helicases	0.000381066	4.44322e-05	0.000212743	3.26415e-05	0.0123548	0.0377995	0.0207076	0.349648	0.250046
COG1204	Superfamily II helicase	5.4819e-05	1.42525e-05	5.30221e-05	2.75988e-05	0.963526	0.949861	0.95384	0.826032	1
COG1205	Distinct helicase family with a unique C-terminal domain including a metal-binding cysteine cluster	0.000142994	3.27959e-05	0.00010517	4.37463e-05	0.578643	0.523556	0.485144	0.658313	1
COG1206	NAD(FAD)-utilizing enzyme possibly involved in translation	0.000383027	6.5113e-05	0.000102823	5.2811e-05	0.00771106	0.0222975	0.009435	0.023324	0.182072
COG1207	N-acetylglucosamine-1-phosphate uridyltransferase (contains nucleotidyltransferase and I-patch acetyltransferase domains)	0.000237514	3.2709e-05	0.000770871	0.000232647	0.0459101	0.00539392	0.00168862	0.00500462	0.585722
COG1208	Nucleoside-diphosphate-sugar pyrophosphorylase involved in lipopolysaccharide biosynthesis/translation initiation factor 2B, gamma/epsilon subunits (eIF-2Bgamma/eIF-2Bepsilon)	0.000573587	5.83376e-05	0.000170604	0.000109792	0.00896105	0.00445015	0.0167981	0.0344982	0.200608
COG1209	dTDP-glucose pyrophosphorylase	0.000579711	6.14223e-05	0.00113672	0.000668947	0.502577	0.222068	0.122146	0.093049	1
COG1210	UDP-glucose pyrophosphorylase	0.000313202	6.66661e-05	0.000444466	0.000103043	0.347466	0.30193	0.350289	0.412052	1
COG1211	4-diphosphocytidyl-2-methyl-D-erithritol synthase	0.000656483	6.36329e-05	0.000447389	9.57896e-05	0.102658	0.0959	0.0821738	0.903532	1
COG1212	CMP-2-keto-3-deoxyoctulosonic acid synthetase	0.000230517	2.46904e-05	0.000115849	7.01632e-05	0.163819	0.0742418	0.129798	0.651353	1
COG1213	Predicted sugar nucleotidyltransferases	0.000111551	2.2186e-05	2.99266e-05	1.43597e-05	0.0117381	0.0410358	0.0162733	0.278867	0.242162
COG1214	Inactive homolog of metal-dependent proteases, putative molecular chaperone	0.000446185	3.29137e-05	0.000338998	3.60224e-05	0.0520051	0.0792498	0.0676432	0.945277	0.62723
COG1215	Glycosyltransferases, probably involved in cell wall biogenesis	0.000756408	4.21885e-05	0.000624403	0.000127516	0.425721	0.226412	0.263381	0.911485	1
COG1216	Predicted glycosyltransferases	0.00109033	0.000119435	0.000903404	0.000210453	0.533016	0.426137	0.410283	0.912269	1
COG1217	Predicted membrane GTPase involved in stress response	0.000729563	5.09579e-05	0.000523052	9.26122e-05	0.0794061	0.0578789	0.0433569	0.921807	0.832838
COG1218	3'-Phosphoadenosine 5'-phosphosulfate (PAPS) 3'-phosphatase	0.000144686	3.44416e-05	0.000126753	8.77148e-05	0.880518	0.818695	0.840728	0.835317	1
COG1219	ATP-dependent protease Clp, ATPase subunit	0.000713776	5.18967e-05	0.000892515	0.000440635	0.749912	0.547275	0.506933	0.522551	1
COG1220	ATP-dependent protease HslVU (ClpYQ), ATPase subunit	7.22188e-05	2.83219e-05	0.000217895	4.00494e-05	0.0140402	0.0145109	0.0973049	0.0595137	0.274216
COG1221	Transcriptional regulators containing an AAA-type ATPase domain and a DNA-binding domain	0.000111747	1.94064e-05	0.000581369	0.000116034	0.00279682	9.35977e-05	0.000120104	0.00737838	0.0918593
COG1222	ATP-dependent 26S proteasome regulatory subunit	1.67728e-06	1.67728e-06	5.30502e-05	5.30502e-05	0.43263	0.152235	0.0429219	1.18852e-05	1
COG1223	Predicted ATPase (AAA+ superfamily)	0	0	0	0	1	NaN	0.999996	1	1
COG1224	DNA helicase TIP49, TBP-interacting protein	0	0	0	0	1	NaN	0.999996	1	1
COG1225	Peroxiredoxin	0.000247643	3.31879e-05	0.000304508	6.54472e-05	0.531812	0.403873	0.400176	0.542277	1
COG1226	Kef-type K+ transport systems, predicted NAD-binding component	9.22514e-05	1.38868e-05	0.000245453	0.000147653	0.362575	0.135492	0.0448207	0.0759592	1
COG1227	Inorganic pyrophosphatase/exopolyphosphatase	0.000302498	3.02673e-05	0.000187616	5.74497e-05	0.112008	0.0769223	0.0880155	0.720049	1
COG1228	Imidazolonepropionase and related amidohydrolases	0.000605657	4.71593e-05	0.000328854	5.55856e-05	0.00382914	0.00552239	0.0039215	0.586397	0.109147
COG1229	Formylmethanofuran dehydrogenase subunit A	0	0	0	0	1	NaN	0.999996	1	1
COG1230	Co/Zn/Cd efflux system component	6.89168e-05	2.37211e-05	0.000301006	5.42233e-05	0.00315962	0.000701958	0.0183609	0.00971131	0.0983897
COG1231	Monoamine oxidase	1.11818e-06	1.11818e-06	1.36904e-05	1.36904e-05	0.458155	0.179189	0.111148	0.00734349	1
COG1232	Protoporphyrinogen oxidase	0.000174398	2.12897e-05	0.000227611	6.20468e-05	0.511974	0.317989	0.356709	0.492816	1
COG1233	Phytoene dehydrogenase and related proteins	6.35131e-05	1.4482e-05	0	0	0.00162928	0.0157229	0.996384	0.000480446	0.0644378
COG1234	Metal-dependent hydrolases of the beta-lactamase superfamily III	0.000444586	4.91912e-05	0.000316666	3.40006e-05	0.0571304	0.131827	0.0989725	0.808324	0.666191
COG1235	Metal-dependent hydrolases of the beta-lactamase superfamily I	0.000566888	3.19309e-05	0.000238359	0.000102465	0.0121833	0.00188128	0.00996164	0.330606	0.248569
COG1236	Predicted exonuclease of the beta-lactamase fold involved in RNA processing	0.000303314	3.63478e-05	0.000108437	7.48536e-05	0.0407947	0.0218217	0.0512476	0.240895	0.548916
COG1237	Metal-dependent hydrolases of the beta-lactamase superfamily II	7.96121e-05	1.565e-05	5.40775e-05	3.53539e-05	0.596984	0.451767	0.5133	0.79067	1
COG1238	Predicted membrane protein	0.000159827	2.70553e-05	6.8441e-05	4.43073e-05	0.113387	0.0950212	0.115231	0.330692	1
COG1239	Mg-chelatase subunit ChlI	3.81967e-05	1.46819e-05	4.09094e-05	2.75101e-05	0.94534	0.925673	0.902417	0.653473	1
COG1240	Mg-chelatase subunit ChlD	4.07278e-05	8.94673e-06	2.37964e-05	1.37395e-05	0.36269	0.319361	0.364683	0.624526	1
COG1241	Predicted ATPase involved in replication control, Cdc46/Mcm family	0	0	0	0	1	NaN	0.999996	1	1
COG1242	Predicted Fe-S oxidoreductase	0.000314205	2.98405e-05	0.000309098	0.000113532	0.972536	0.953027	0.970449	0.81636	1
COG1243	Histone acetyltransferase	7.99172e-05	1.9027e-05	3.23801e-05	1.87287e-05	0.109561	0.159757	0.127125	0.28661	1
COG1244	Predicted Fe-S oxidoreductase	3.44651e-06	3.44651e-06	0	0	0.35885	0.528757	0.996873	0.272772	1
COG1245	Predicted ATPase, RNase L inhibitor (RLI) homolog	0	0	0	0	1	NaN	0.999996	1	1
COG1246	N-acetylglutamate synthase and related acetyltransferases	1.83874e-05	7.65093e-06	5.02861e-05	3.98346e-05	0.525503	0.272776	0.225797	0.063693	1
COG1247	Sortase and related acyltransferases	0.000414291	3.79537e-05	0.00033882	6.48155e-05	0.375668	0.311428	0.332845	0.912809	1
COG1249	Pyruvate/2-oxoglutarate dehydrogenase complex, dihydrolipoamide dehydrogenase (E3) component, and related enzymes	0.00063509	5.21815e-05	0.00113772	7.35751e-05	0.000382584	0.000207042	0.00100449	0.200845	0.034918
COG1250	3-hydroxyacyl-CoA dehydrogenase	0.000337378	4.09379e-05	0.00036106	0.000130635	0.891369	0.822987	0.787026	0.709223	1
COG1251	NAD(P)H-nitrite reductase	5.47789e-05	1.31162e-05	0.000216209	0.000108838	0.190695	0.0445839	0.0142637	0.00621215	1
COG1252	NADH dehydrogenase, FAD-containing subunit	0.000145787	2.73876e-05	0.000187746	7.04697e-05	0.659747	0.506248	0.487393	0.475765	1
COG1253	Hemolysins and related proteins containing CBS domains	0.0012996	7.72664e-05	0.00107609	0.000244015	0.478936	0.273288	0.25466	0.925891	1
COG1254	Acylphosphatases	9.42641e-05	1.95416e-05	0.000197754	8.16556e-05	0.280682	0.109353	0.107526	0.119082	1
COG1256	Flagellar hook-associated protein	0.000176813	5.10984e-05	5.6153e-05	3.97911e-05	0.095158	0.171254	0.102942	0.110459	0.950774
COG1257	Hydroxymethylglutaryl-CoA reductase	2.05912e-05	8.83001e-06	3.72193e-05	2.16566e-05	0.567993	0.40521	0.459538	0.195337	1
COG1258	Predicted pseudouridylate synthase	0	0	0	0	1	NaN	0.999996	1	1
COG1259	Uncharacterized conserved protein	0.000108989	2.43511e-05	1.7113e-05	1.7113e-05	0.0117612	0.037884	0.0255528	0.0155623	0.242162
COG1261	Flagellar basal body P-ring biosynthesis protein	5.01391e-05	1.64574e-05	0.000249453	9.01297e-05	0.0538092	0.00821308	0.0132651	0.000968268	0.640043
COG1262	Uncharacterized conserved protein	0.000177408	2.8929e-05	1.35689e-05	1.35689e-05	0.000610156	0.00404022	0.00330083	0.000317131	0.0382627
COG1263	Phosphotransferase system IIC components, glucose/maltose/N-acetylglucosamine-specific	0.0011551	9.63394e-05	0.00307537	0.000313427	0.00026715	8.32144e-06	2.66334e-05	0.0306128	0.0313058
COG1266	Predicted metal-dependent membrane protease	0.000293813	3.5639e-05	0.000496261	0.000311089	0.605565	0.339595	0.266312	0.221634	1
COG1267	Phosphatidylglycerophosphatase A and related proteins	6.83327e-05	1.52979e-05	0.000143111	2.73927e-05	0.0377143	0.0262015	0.0644808	0.10037	0.518814
COG1268	Uncharacterized conserved protein	0.000215845	4.09895e-05	0.000225836	8.40869e-05	0.933516	0.905445	0.937928	0.756348	1
COG1269	Archaeal/vacuolar-type H+-ATPase subunit I	0.000390632	4.45938e-05	0.000168947	7.58209e-05	0.0295019	0.0223339	0.0295537	0.19672	0.450935
COG1270	Cobalamin biosynthesis protein CobD/CbiB	0.000420963	5.00605e-05	0.000169708	2.27532e-05	0.00125329	0.00830825	0.00177898	0.15524	0.0563801
COG1271	Cytochrome bd-type quinol oxidase, subunit 1	0.000285796	4.93415e-05	0.000306566	0.000114295	0.895073	0.845941	0.818024	0.718549	1
COG1272	Predicted membrane protein, hemolysin III homolog	0.000280789	3.08066e-05	0.000809138	0.000424498	0.277291	0.0767992	0.0155487	0.0148384	1
COG1273	Uncharacterized conserved protein	4.47273e-06	4.47273e-06	1.7113e-05	1.7113e-05	0.565826	0.342929	0.421275	0.0264961	1
COG1274	Phosphoenolpyruvate carboxykinase (GTP)	7.88035e-05	1.62891e-05	1.7113e-05	1.7113e-05	0.0254188	0.044782	0.0521411	0.0274924	0.407556
COG1275	Tellurite resistance protein and related permeases	2.6566e-05	8.41106e-06	0.00011094	3.05892e-05	0.0236411	0.00385425	0.01299	0.00166895	0.390696
COG1276	Putative copper export protein	2.20966e-06	2.20966e-06	0.000108709	6.67069e-05	0.150547	0.0277093	0.0184592	2.72551e-10	1
COG1277	ABC-type transport system involved in multi-copper enzyme maturation, permease component	9.34214e-05	2.62769e-05	1.35689e-05	1.35689e-05	0.0218964	0.0792305	0.027458	0.00176573	0.374485
COG1279	Lysine efflux permease	3.6834e-05	1.30863e-05	0.000181645	7.84534e-05	0.102302	0.0198461	0.0224708	0.000521495	0.998021
COG1280	Putative threonine efflux protein	0.000218374	2.11115e-05	0.000709874	0.000435027	0.322275	0.101408	0.0151622	0.00448175	1
COG1283	Na+/phosphate symporter	0.000792228	4.7064e-05	0.000293342	0.000111261	0.0023087	0.000428026	0.00208288	0.0761703	0.0810947
COG1284	Uncharacterized conserved protein	0.00101803	4.60788e-05	0.000349286	0.000149586	0.00186675	0.000141112	0.00257105	0.05499	0.0700359
COG1285	Uncharacterized membrane protein	0.000335148	4.55352e-05	0.000178936	6.98616e-05	0.093255	0.0852277	0.0844098	0.28371	0.934386
COG1287	Uncharacterized membrane protein, required for N-linked glycosylation	1.49489e-05	8.50329e-06	0	0	0.113852	0.27711	0.996627	0.0381269	1
COG1288	Predicted membrane protein	0.000272401	5.55332e-05	0.000160544	3.8202e-05	0.13593	0.233274	0.177792	0.765924	1
COG1289	Predicted membrane protein	0.00015229	2.85818e-05	0.000756669	0.000375247	0.147757	0.0283445	0.00294549	0.0115626	1
COG1290	Cytochrome b subunit of the bc complex	2.20966e-06	2.20966e-06	2.81922e-05	1.12175e-05	0.0457452	0.00678659	0.0937663	0.00147958	0.585722
COG1291	Flagellar motor component	5.49636e-05	1.6456e-05	9.88562e-05	6.25447e-05	0.586875	0.367481	0.33066	0.255392	1
COG1292	Choline-glycine betaine transporter	0.000202814	4.39222e-05	0.000279485	9.62301e-05	0.560091	0.415424	0.441718	0.443463	1
COG1293	Predicted RNA-binding protein homologous to eukaryotic snRNP	0.000383512	4.68087e-05	0.0001598	4.00752e-05	0.00491753	0.0135788	0.00539202	0.464365	0.132229
COG1294	Cytochrome bd-type quinol oxidase, subunit 2	0.000258048	4.75583e-05	0.000318471	9.4769e-05	0.650964	0.534612	0.530813	0.535102	1
COG1295	Predicted membrane protein	0.000323606	2.92864e-05	0.000299954	6.34044e-05	0.788325	0.701401	0.79633	0.812372	1
COG1296	Predicted branched-chain amino acid permease (azaleucine resistance)	0.000252893	4.43187e-05	0.000325666	6.6276e-05	0.459388	0.381531	0.404314	0.500215	1
COG1297	Predicted membrane protein	0.000317112	2.8452e-05	0.000129088	7.52491e-05	0.0410091	0.0139179	0.0415224	0.4178	0.550575
COG1298	Flagellar biosynthesis pathway, component FlhA	8.08982e-05	2.4988e-05	0.00022807	0.000129763	0.32832	0.130459	0.106454	0.0723091	1
COG1299	Phosphotransferase system, fructose-specific IIC component	0.000287932	4.29222e-05	0.000719374	8.82652e-05	0.0015996	0.000397847	0.00278085	0.0957544	0.0643361
COG1300	Uncharacterized membrane protein	4.82494e-05	1.36054e-05	2.38657e-05	1.61683e-05	0.311196	0.316761	0.303685	0.570614	1
COG1301	Na+/H+-dicarboxylate symporters	0.000696762	5.19037e-05	0.000651831	0.000171193	0.842741	0.743406	0.786412	0.829111	1
COG1303	Uncharacterized protein conserved in archaea	0	0	0	0	1	NaN	0.999996	1	1
COG1304	L-lactate dehydrogenase (FMN-dependent) and related alpha-hydroxy acid dehydrogenases	0.000185816	3.92056e-05	0.000259046	6.90616e-05	0.455094	0.345158	0.383572	0.419876	1
COG1305	Transglutaminase-like enzymes, putative cysteine proteases	0.000675641	7.23867e-05	0.000584651	0.000205123	0.740835	0.603509	0.586504	0.917296	1
COG1306	Uncharacterized conserved protein	6.12873e-05	1.88584e-05	0	0	0.008872	0.0581865	0.996387	0.000907412	0.199556
COG1307	Uncharacterized protein conserved in bacteria	0.000910114	9.29263e-05	0.000359264	0.000122816	0.00544853	0.00599995	0.00444774	0.332847	0.141691
COG1308	Transcription factor homologous to NACalpha-BTF3	0	0	0	0	1	NaN	0.999996	1	1
COG1309	Transcriptional regulator	0.00244124	0.000143945	0.0050737	0.000619931	0.00228231	0.000106017	7.01783e-05	0.148554	0.081068
COG1310	Predicted metal-dependent protease of the PAD1/JAB1 superfamily	6.75863e-05	1.81553e-05	0.000112768	4.21971e-05	0.42547	0.265096	0.280045	0.281175	1
COG1311	Archaeal DNA polymerase II, small subunit/DNA polymerase delta, subunit B	0	0	0	0	1	NaN	0.999996	1	1
COG1312	D-mannonate dehydratase	0.00054465	4.43656e-05	0.000343891	5.81883e-05	0.0205111	0.0249255	0.0212928	0.672706	0.358547
COG1313	Uncharacterized Fe-S protein PflX, homolog of pyruvate formate lyase activating proteins	0.000261133	5.51518e-05	5.78455e-05	2.51767e-05	0.00758903	0.0380191	0.00485721	0.0723662	0.180992
COG1314	Preprotein translocase subunit SecG	0.000128086	2.69042e-05	7.88747e-05	5.85697e-05	0.537686	0.392877	0.43012	0.64438	1
COG1315	Predicted polymerase, most proteins contain PALM domain, HD hydrolase domain and Zn-ribbon domain	6.22287e-05	2.02758e-05	3.85793e-05	2.26182e-05	0.529955	0.504226	0.506723	0.663101	1
COG1316	Transcriptional regulator	0.000739164	7.20554e-05	0.000739685	0.000243591	0.998344	0.997851	0.979738	0.787052	1
COG1317	Flagellar biosynthesis/type III secretory pathway protein	4.69361e-05	1.4591e-05	9.69942e-05	3.24215e-05	0.215042	0.126602	0.195437	0.147317	1
COG1318	Predicted transcriptional regulators	0	0	0	0	1	NaN	0.999996	1	1
COG1320	Multisubunit Na+/H+ antiporter, MnhG subunit	9.69968e-06	6.41669e-06	1.68819e-05	1.68819e-05	0.752943	0.629588	0.642509	0.280565	1
COG1321	Mn-dependent transcriptional regulator	0.000546397	9.34649e-05	0.000454512	0.000185974	0.727352	0.62943	0.640248	0.962261	1
COG1322	Uncharacterized protein conserved in bacteria	0.0003237	3.38857e-05	0.000325159	7.78731e-05	0.989047	0.984077	0.952691	0.799891	1
COG1323	Predicted nucleotidyltransferase	0.00020565	3.07304e-05	0.000153292	1.76137e-05	0.188772	0.30365	0.233143	0.804316	1
COG1324	Uncharacterized protein involved in tolerance to divalent cations	8.12726e-06	5.88822e-06	8.02583e-05	4.74888e-05	0.176065	0.0408961	0.0663162	0.000106326	1
COG1325	Predicted exosome subunit	0	0	0	0	1	NaN	0.999996	1	1
COG1326	Uncharacterized archaeal Zn-finger protein	0	0	0	0	1	NaN	0.999996	1	1
COG1328	Oxygen-sensitive ribonucleoside-triphosphate reductase	0.000963283	5.41968e-05	0.000870872	0.000152568	0.650433	0.48181	0.514213	0.944471	1
COG1330	Exonuclease V gamma subunit	1.02981e-05	6.61767e-06	0.000180411	0.000103966	0.141645	0.0257808	0.0160935	7.95461e-07	1
COG1331	Highly conserved protein containing a thioredoxin domain	2.424e-05	9.20102e-06	5.95428e-05	2.392e-05	0.225969	0.115016	0.174614	0.0745341	1
COG1332	Uncharacterized protein predicted to be involved in DNA repair (RAMP superfamily)	3.69118e-05	1.45699e-05	0	0	0.0287796	0.127623	0.996474	0.000628702	0.444186
COG1333	ResB protein required for cytochrome c biosynthesis	9.40648e-05	3.23454e-05	1.7113e-05	1.7113e-05	0.0607848	0.158577	0.0678114	0.028587	0.696507
COG1335	Amidases related to nicotinamidase	0.000482722	3.25034e-05	0.000960455	0.000203646	0.0422492	0.00513904	0.00178887	0.131066	0.556982
COG1336	Uncharacterized protein predicted to be involved in DNA repair (RAMP superfamily)	2.18436e-05	8.87586e-06	0	0	0.032899	0.137737	0.996566	0.00168998	0.47895
COG1337	Uncharacterized protein predicted to be involved in DNA repair (RAMP superfamily)	5.19878e-05	1.55482e-05	1.68819e-05	1.68819e-05	0.167054	0.206443	0.191318	0.155474	1
COG1338	Flagellar biosynthesis pathway, component FliP	7.58543e-05	1.17371e-05	0.000116948	5.80995e-05	0.577848	0.334192	0.30081	0.306816	1
COG1339	Transcriptional regulator of a riboflavin/FAD biosynthetic operon	0	0	0	0	1	NaN	0.999996	1	1
COG1340	Uncharacterized archaeal coiled-coil protein	0	0	0	0	1	NaN	0.999996	1	1
COG1341	Predicted GTPase or GTP-binding protein	0	0	0	0	1	NaN	0.999996	1	1
COG1342	Predicted DNA-binding proteins	0.000111757	2.77755e-05	4.9489e-05	3.72291e-05	0.238766	0.227156	0.217147	0.233351	1
COG1343	Uncharacterized protein predicted to be involved in DNA repair	0.000192685	2.84642e-05	5.11078e-05	3.27294e-05	0.00868401	0.0137245	0.0154245	0.0485547	0.196726
COG1344	Flagellin and related hook-associated proteins	0.000397478	7.08637e-05	0.000204825	0.000120468	0.225702	0.17422	0.183529	0.312535	1
COG1345	Flagellar capping protein	0.000122176	3.82323e-05	0.000136937	9.55167e-05	0.909341	0.863636	0.84979	0.660396	1
COG1347	Na+-transporting NADH:ubiquinone oxidoreductase, subunit NqrD	0.000112134	2.4238e-05	3.71957e-05	3.71957e-05	0.129963	0.116391	0.152892	0.103798	1
COG1348	Nitrogenase subunit NifH (ATPase)	0.000100728	1.75569e-05	9.91522e-05	4.17435e-05	0.977741	0.967334	0.932929	0.813517	1
COG1349	Transcriptional regulators of sugar metabolism	0.000760281	8.13286e-05	0.00237931	0.000435639	0.00475592	0.000221691	0.00013544	0.00800487	0.12995
COG1350	Predicted alternative tryptophan synthase beta-subunit (paralog of TrpB)	0.000213498	3.59274e-05	1.68819e-06	1.68819e-06	0.00026715	0.00277522	0.000849025	1.03875e-07	0.0313058
COG1351	Predicted alternative thymidylate synthase	0.000224703	3.83891e-05	0	0	0.00026715	0.00290665	0.996168	1.07272e-08	0.0313058
COG1352	Methylase of chemotaxis methyl-accepting proteins	7.86768e-05	2.35135e-05	0.000108161	2.04408e-05	0.442954	0.458287	0.524401	0.389876	1
COG1353	Predicted hydrolase of the HD superfamily (permuted catalytic motifs)	7.71882e-05	1.86669e-05	0	0	0.00228891	0.0210438	0.996348	1.73108e-06	0.081068
COG1354	Uncharacterized conserved protein	0.000268298	4.91591e-05	0.000183712	5.13016e-05	0.2968	0.325283	0.288051	0.57081	1
COG1355	Predicted dioxygenase	2.3024e-05	1.03634e-05	0.000122256	9.60838e-05	0.365616	0.139945	0.075017	0.000378607	1
COG1356	Uncharacterized protein conserved in archaea	0	0	0	0	1	NaN	0.999996	1	1
COG1357	Uncharacterized low-complexity proteins	0.000191611	2.08526e-05	0.000225438	1.71412e-05	0.273307	0.338658	0.459736	0.568897	1
COG1358	Ribosomal protein HS6-type (S12/L30/L7a)	0.000123906	3.13713e-05	9.14315e-05	5.62806e-05	0.689882	0.597826	0.562434	1	1
COG1359	Uncharacterized conserved protein	0.000189256	2.60685e-05	0.000232759	0.000159418	0.831234	0.694235	0.652542	0.519245	1
COG1360	Flagellar motor protein	0.000112633	2.16024e-05	0.000112672	4.95273e-05	0.999189	0.999328	0.967096	0.718299	1
COG1361	S-layer domain	0.000177473	1.734e-05	0.000274988	0.000147088	0.598323	0.331994	0.288666	0.355618	1
COG1362	Aspartyl aminopeptidase	0.000764183	5.97513e-05	0.000195417	9.28329e-05	0.000593666	0.000281795	0.00119976	0.226218	0.0382627
COG1363	Cellulase M and related proteins	0.000339958	3.78462e-05	0.000400594	0.00013238	0.727996	0.562088	0.563862	0.572835	1
COG1365	Predicted ATPase (PP-loop superfamily)	0	0	0	0	1	NaN	0.999996	1	1
COG1366	Anti-anti-sigma regulatory factor (antagonist of anti-sigma factor)	0.000307784	3.5615e-05	0.000116099	4.26881e-05	0.0065765	0.00933312	0.00719291	0.38946	0.16214
COG1367	Uncharacterized protein predicted to be involved in DNA repair (RAMP superfamily)	0	0	0	0	1	NaN	0.999996	1	1
COG1368	Phosphoglycerol transferase and related proteins, alkaline phosphatase superfamily	0.000874962	8.52408e-05	0.000979566	0.000454103	0.858035	0.745063	0.75417	0.626472	1
COG1371	Uncharacterized conserved protein	0	0	0	0	1	NaN	0.999996	1	1
COG1372	Intein/homing endonuclease	2.21706e-05	6.4548e-06	3.56104e-05	3.33974e-05	0.754542	0.573929	0.630067	0.41225	1
COG1373	Predicted ATPase (AAA+ superfamily)	0.00238904	0.000141704	0.00176949	0.000613403	0.425223	0.188922	0.227615	0.930176	1
COG1374	Protein involved in ribosomal biogenesis, contains PUA domain	0	0	0	0	1	NaN	0.999996	1	1
COG1376	Uncharacterized protein conserved in bacteria	0.000470648	4.54723e-05	0.000725968	0.000122765	0.0799272	0.0320157	0.0327041	0.348601	0.835982
COG1377	Flagellar biosynthesis pathway, component FlhB	5.49042e-05	2.31544e-05	0.00012354	5.42481e-05	0.3071	0.191029	0.265746	0.139372	1
COG1378	Predicted transcriptional regulators	1.60828e-05	8.40305e-06	0	0	0.0863652	0.239039	0.996619	0.0288376	0.879586
COG1379	Uncharacterized conserved protein	3.22836e-05	1.59423e-05	2.37964e-05	1.37395e-05	0.749645	0.750063	0.751607	0.923841	1
COG1380	Putative effector of murein hydrolase LrgA	0.000201299	1.76979e-05	0.000202492	8.66322e-05	0.991349	0.984697	0.885814	0.751321	1
COG1381	Recombinational DNA repair protein (RecF pathway)	0.000425975	3.1162e-05	0.000525629	0.000140032	0.577096	0.340865	0.368376	0.545104	1
COG1382	Prefoldin, chaperonin cofactor	0	0	0	0	1	NaN	0.999996	1	1
COG1383	Ribosomal protein S17E	0	0	0	0	1	NaN	0.999996	1	1
COG1384	Lysyl-tRNA synthetase (class I)	0	0	0	0	1	NaN	0.999996	1	1
COG1385	Uncharacterized protein conserved in bacteria	0.00043009	2.45485e-05	0.000404731	6.2587e-05	0.765406	0.650643	0.645058	0.841653	1
COG1387	Histidinol phosphatase and related hydrolases of the PHP family	0.000697653	5.8182e-05	0.00039227	7.47673e-05	0.0092348	0.0115886	0.00879015	0.573848	0.205766
COG1388	FOG: LysM repeat	0.000606279	4.71018e-05	0.000263216	7.47521e-05	0.00334102	0.00217402	0.00274021	0.358179	0.100238
COG1389	DNA topoisomerase VI, subunit B	0	0	0	0	1	NaN	0.999996	1	1
COG1390	Archaeal/vacuolar-type H+-ATPase subunit E	0.000175515	1.93936e-05	4.01941e-05	1.68282e-05	0.000521106	0.00130296	0.000824614	0.0829049	0.0366394
COG1391	Glutamine synthetase adenylyltransferase	6.50445e-05	2.38397e-05	0.000292908	5.28699e-05	0.00312334	0.000754108	0.0219321	0.00596453	0.0978436
COG1392	Phosphate transport regulator (distant homolog of PhoU)	0.000124571	1.04937e-05	0.000250097	9.84024e-05	0.267407	0.0749858	0.0359715	0.160193	1
COG1393	Arsenate reductase and related proteins, glutaredoxin family	0.000246038	5.25008e-05	0.000389112	8.25819e-05	0.195036	0.163936	0.218803	0.309967	1
COG1395	Predicted transcriptional regulator	0	0	0	0	1	NaN	0.999996	1	1
COG1396	Predicted transcriptional regulators	0.00265314	0.000195911	0.00222123	0.000161996	0.127051	0.201467	0.186082	0.978146	1
COG1398	Fatty-acid desaturase	0	0	0	0	1	NaN	0.999996	1	1
COG1399	Predicted metal-binding, possibly nucleic acid-binding protein	0.000251607	3.52029e-05	0.000261799	0.000113639	0.946069	0.911423	0.962658	0.756868	1
COG1400	Signal recognition particle 19 kDa protein	0	0	0	0	1	NaN	0.999996	1	1
COG1401	GTPase subunit of restriction endonuclease	0.00015944	1.93006e-05	6.55403e-05	2.95782e-05	0.0236675	0.0213048	0.0273045	0.271547	0.390696
COG1402	Uncharacterized protein, putative amidase	0.000154901	2.91484e-05	0.00021503	6.22714e-05	0.478402	0.333645	0.364973	0.414844	1
COG1403	Restriction endonuclease	0.000101803	2.12841e-05	0.000163084	3.61599e-05	0.19559	0.152098	0.215131	0.297387	1
COG1404	Subtilisin-like serine proteases	0.000851897	8.3966e-05	0.00055129	0.000183484	0.183126	0.110145	0.121777	0.619254	1
COG1405	Transcription initiation factor TFIIIB, Brf1 subunit/Transcription initiation factor TFIIB	0	0	0	0	1	NaN	0.999996	1	1
COG1406	Predicted inhibitor of MCP methylation, homolog of CheC	5.66547e-06	5.66547e-06	0	0	0.38111	0.528757	0.996793	0.0651616	1
COG1407	Predicted ICC-like phosphoesterases	0	0	0	0	1	NaN	0.999996	1	1
COG1408	Predicted phosphohydrolases	0.000699731	5.50534e-05	0.000257434	0.000110945	0.00548811	0.00196367	0.00624674	0.151862	0.14233
COG1409	Predicted phosphohydrolases	0.00128341	0.000109094	0.000360514	9.50316e-05	0.0001781	0.000301664	0.000100892	0.0662964	0.0281752
COG1410	Methionine synthase I, cobalamin-binding domain	0.000642819	5.68142e-05	0.000187936	8.66651e-05	0.00161609	0.00102738	0.00254591	0.0778455	0.0644378
COG1411	Uncharacterized protein related to proFAR isomerase (HisA)	0	0	0	0	1	NaN	0.999996	1	1
COG1412	Uncharacterized proteins of PilT N-term./Vapc superfamily	0	0	0	0	1	NaN	0.999996	1	1
COG1413	FOG: HEAT repeat	4.46036e-05	1.03008e-05	0	0	0.00176451	0.0167724	0.996446	0.000102593	0.0675149
COG1414	Transcriptional regulator	0.000331422	2.0522e-05	0.00103786	0.000312893	0.0472393	0.00453901	0.000224801	0.0139473	0.592329
COG1415	Uncharacterized conserved protein	0	0	0	0	1	NaN	0.999996	1	1
COG1416	Uncharacterized conserved protein	4.92359e-06	4.92359e-06	5.08041e-05	3.24644e-05	0.21898	0.0585021	0.156666	9.81113e-05	1
COG1417	Uncharacterized conserved protein	0	0	0	0	1	NaN	0.999996	1	1
COG1418	Predicted HD superfamily hydrolase	0.00100283	4.00905e-05	0.000876937	0.000353055	0.778342	0.595056	0.623783	0.968605	1
COG1419	Flagellar GTP-binding protein	3.00751e-05	1.57578e-05	0	0	0.0873876	0.240268	0.996512	0.000852435	0.885249
COG1420	Transcriptional regulator of heat shock gene	0.000299462	5.17217e-05	0.000296796	0.000113294	0.986098	0.980512	0.953422	0.842756	1
COG1421	Uncharacterized protein predicted to be involved in DNA repair	1.4119e-05	7.07021e-06	0	0	0.0723876	0.22054	0.996633	0.0031084	0.781684
COG1422	Predicted membrane protein	0	0	0	0	1	NaN	0.999996	1	1
COG1423	ATP-dependent DNA ligase, homolog of eukaryotic ligase III	1.96944e-06	1.96944e-06	0	0	0.583403	0.528757	0.996965	0.236892	1
COG1424	Pimeloyl-CoA synthetase	1.18403e-05	6.8477e-06	1.68819e-05	1.68819e-05	0.826607	0.742072	0.734664	0.39327	1
COG1426	Uncharacterized protein conserved in bacteria	4.46687e-05	1.98884e-05	0.00014865	6.67684e-05	0.182097	0.0702703	0.12688	0.00712837	1
COG1427	Predicted periplasmic solute-binding protein	1.1887e-05	6.75532e-06	0	0	0.113522	0.276689	0.996662	0.014731	1
COG1428	Deoxynucleoside kinases	1.40381e-05	9.67818e-06	0.000112355	3.2756e-05	0.0162697	0.00258991	0.0723528	2.86904e-05	0.308247
COG1430	Uncharacterized conserved protein	7.52476e-06	5.07727e-06	0	0	0.186949	0.355766	0.996739	0.0204059	1
COG1431	Uncharacterized protein containing piwi/argonaute domain	5.01051e-06	5.01051e-06	0	0	0.38111	0.528757	0.996811	0.0282534	1
COG1432	Uncharacterized conserved protein	0.0001351	2.79722e-05	7.30773e-05	4.22026e-05	0.283469	0.245081	0.246263	0.310323	1
COG1433	Uncharacterized conserved protein	0.000161292	3.64741e-05	1.68819e-05	1.68819e-05	0.00527373	0.0279492	0.00910828	0.000640234	0.138282
COG1434	Uncharacterized conserved protein	0.000199016	2.13904e-05	0.000365822	7.01846e-05	0.0456892	0.0113607	0.0135457	0.248953	0.585722
COG1435	Thymidine kinase	0.00024699	2.55714e-05	0.000238089	4.86626e-05	0.897725	0.861359	0.977025	0.739534	1
COG1436	Archaeal/vacuolar-type H+-ATPase subunit F	7.7164e-05	1.45971e-05	0.000107349	6.99893e-05	0.738322	0.553026	0.498795	0.416002	1
COG1437	Adenylate cyclase, class 2 (thermophilic)	3.93887e-06	3.93887e-06	1.54982e-05	1.54982e-05	0.561136	0.334739	0.409761	0.0487205	1
COG1438	Arginine repressor	0.000503939	2.49175e-05	0.000464179	0.000137379	0.82194	0.681586	0.588337	0.814872	1
COG1439	Predicted nucleic acid-binding protein, consists of a PIN domain and a Zn-ribbon module	0	0	0	0	1	NaN	0.999996	1	1
COG1440	Phosphotransferase system cellobiose-specific component IIB	0.000100293	2.97755e-05	0.00067225	9.74031e-05	0.000369392	1.21675e-05	0.00158047	0.00301291	0.034918
COG1441	O-succinylbenzoate synthase	1.43628e-05	5.30115e-06	0.000108894	5.89813e-05	0.150399	0.0298305	0.00834583	0.00288038	1
COG1442	Lipopolysaccharide biosynthesis proteins, LPS:glycosyltransferases	0.000297909	3.54141e-05	0.000228087	0.000145737	0.712692	0.52536	0.565017	0.983207	1
COG1443	Isopentenyldiphosphate isomerase	5.94321e-05	1.44521e-05	8.81736e-05	6.75659e-05	0.742316	0.560446	0.507141	0.385759	1
COG1444	Predicted P-loop ATPase fused to an acetyltransferase	4.12178e-06	3.15516e-06	0.000151716	6.88418e-05	0.0569358	0.00598636	0.00737234	2.36947e-06	0.666191
COG1448	Aspartate/tyrosine/aromatic aminotransferase	8.26504e-05	1.86237e-05	0.000258804	0.000165737	0.352865	0.130808	0.0529913	0.0539704	1
COG1449	Alpha-amylase/alpha-mannosidase	0.000180547	2.17598e-05	0	0	2.3087e-05	0.000217683	0.996207	7.67457e-05	0.0108366
COG1450	Type II secretory pathway, component PulD	4.36573e-05	7.83987e-06	0.000174022	0.000100945	0.258782	0.0682578	0.00985355	0.0192169	1
COG1451	Predicted metal-dependent hydrolase	0.000326867	5.68621e-05	0.000309461	1.43564e-05	0.814193	0.846611	0.839902	0.797334	1
COG1452	Organic solvent tolerance protein OstA	0.000124719	2.31973e-05	5.71772e-05	3.81471e-05	0.171461	0.144166	0.168205	0.499923	1
COG1453	Predicted oxidoreductases of the aldo/keto reductase family	0.00065511	5.99491e-05	0.000185353	0.000107551	0.00374009	0.0017242	0.00753323	0.180719	0.107578
COG1454	Alcohol dehydrogenase, class IV	0.00154804	7.07619e-05	0.0019878	0.000455462	0.43954	0.178349	0.132693	0.501872	1
COG1455	Phosphotransferase system cellobiose-specific component IIC	0.000286977	7.56702e-05	0.00121149	0.000249996	0.00576185	0.000616311	0.00587777	0.0119058	0.147814
COG1456	CO dehydrogenase/acetyl-CoA synthase gamma subunit (corrinoid Fe-S protein)	3.64695e-05	1.29729e-05	5.13389e-06	5.13389e-06	0.0477406	0.149175	0.0585133	0.0907961	0.59625
COG1457	Purine-cytosine permease and related proteins	0.000140795	3.55463e-05	0.000462411	0.000127526	0.0348844	0.00685047	0.0165967	0.030751	0.494538
COG1458	Predicted DNA-binding protein containing PIN domain	0	0	0	0	1	NaN	0.999996	1	1
COG1459	Type II secretory pathway, component PulF	0.000266417	2.81932e-05	0.000413238	9.77339e-05	0.201322	0.0764992	0.0718001	0.33758	1
COG1460	Uncharacterized protein conserved in archaea	0	0	0	0	1	NaN	0.999996	1	1
COG1461	Predicted kinase related to dihydroxyacetone kinase	0.000368129	4.91603e-05	0.000140755	2.22296e-05	0.00201846	0.0130122	0.00255665	0.273079	0.0748404
COG1462	Uncharacterized protein involved in formation of curli polymers	5.81635e-06	3.90498e-06	4.92619e-05	3.21143e-05	0.237935	0.0632366	0.064972	0.000829265	1
COG1463	ABC-type transport system involved in resistance to organic solvents, periplasmic component	0.000200703	3.00185e-05	4.78783e-05	2.99487e-05	0.00513521	0.0107209	0.00964065	0.10423	0.136711
COG1464	ABC-type metal ion transport system, periplasmic component/surface antigen	0.000302022	5.05905e-05	0.00124776	0.000349759	0.0230111	0.00188069	0.000800181	0.0092186	0.385116
COG1465	Predicted alternative 3-dehydroquinate synthase	1.72182e-05	8.84698e-06	0	0	0.0806066	0.2317	0.996608	0.0137561	0.838941
COG1466	DNA polymerase III, delta subunit	0.000403216	3.78514e-05	0.000337744	9.2406e-05	0.600117	0.442378	0.386999	0.989477	1
COG1467	Eukaryotic-type DNA primase, catalytic (small) subunit	0	0	0	0	1	NaN	0.999996	1	1
COG1468	RecB family exonuclease	0.000178302	2.39317e-05	6.78378e-05	2.75688e-05	0.0128199	0.0200432	0.016422	0.263077	0.256721
COG1469	Uncharacterized conserved protein	5.19487e-05	1.93852e-05	0	0	0.0228891	0.109168	0.996416	0.000297113	0.384923
COG1470	Predicted membrane protein	6.47504e-05	2.21715e-05	1.68819e-05	1.68819e-05	0.123529	0.206947	0.138608	0.123349	1
COG1471	Ribosomal protein S4E	5.41595e-06	5.41595e-06	0	0	0.38111	0.528757	0.996797	0.0686941	1
COG1473	Metal-dependent amidase/aminoacylase/carboxypeptidase	0.000961492	0.00010838	0.00134007	0.000139249	0.0564741	0.0693547	0.10278	0.413432	0.663497
COG1474	Cdc6-related protein, AAA superfamily ATPase	0	0	0	0	1	NaN	0.999996	1	1
COG1475	Predicted transcriptional regulators	0.00250155	0.000158282	0.00137607	0.000172902	0.000860815	0.00142664	0.000655967	0.463058	0.0434618
COG1476	Predicted transcriptional regulators	0.000662355	7.87055e-05	0.000345264	0.000166576	0.12274	0.0729085	0.0947724	0.418516	1
COG1479	Uncharacterized conserved protein	0.000393492	3.87323e-05	0.000393928	0.000181829	0.99811	0.997359	0.957384	0.809811	1
COG1480	Predicted membrane-associated HD superfamily hydrolase	0.000210802	3.55166e-05	6.42977e-05	2.14915e-05	0.00583441	0.0244856	0.00631175	0.103616	0.149272
COG1481	Uncharacterized protein conserved in bacteria	0.000285	4.73483e-05	0.00033506	0.000106599	0.734252	0.622632	0.657472	0.606923	1
COG1482	Phosphomannose isomerase	0.00050105	5.22057e-05	0.000501991	0.000120848	0.995205	0.993352	0.965113	0.808531	1
COG1483	Predicted ATPase (AAA+ superfamily)	3.40089e-05	1.35184e-05	0	0	0.0297657	0.130029	0.996487	0.000592228	0.45278
COG1484	DNA replication protein	0.00147315	0.00012941	0.00414733	0.00211298	0.269132	0.0715234	0.0126709	0.0265519	1
COG1485	Predicted ATPase	0	0	9.28231e-05	7.20928e-05	0.258789	0.0648199	0.99647	0	1
COG1486	Alpha-galactosidases/6-phospho-beta-glucosidases, family 4 of glycosyl hydrolases	0.00023344	5.13675e-05	0.00100941	0.000304259	0.0298845	0.00318228	0.00289494	0.00234872	0.453859
COG1487	Predicted nucleic acid-binding protein, contains PIN domain	2.0956e-05	9.13263e-06	0.000114643	3.9969e-05	0.0447393	0.00761436	0.0296445	0.00103388	0.579285
COG1488	Nicotinic acid phosphoribosyltransferase	0.000548059	3.82101e-05	0.000492188	9.57182e-05	0.667208	0.519797	0.485648	0.950156	1
COG1491	Predicted RNA-binding protein	0	0	0	0	1	NaN	0.999996	1	1
COG1492	Cobyric acid synthase	0.000455566	5.30581e-05	0.000143211	5.87416e-05	0.00305078	0.0050645	0.0036272	0.0823077	0.0965262
COG1493	Serine kinase of the HPr protein, regulates carbohydrate metabolism	0.000463217	3.82693e-05	0.000110395	3.91822e-05	0.000164907	0.000177261	0.000135	0.0300593	0.0279516
COG1495	Disulfide bond formation protein DsbB	1.01896e-05	5.98737e-06	9.57565e-05	5.98974e-05	0.210108	0.0491538	0.0364239	2.17889e-05	1
COG1496	Uncharacterized conserved protein	0.000368405	2.83981e-05	0.000341241	3.42128e-05	0.626743	0.587825	0.655478	0.920172	1
COG1497	Predicted transcriptional regulator	0	0	0	0	1	NaN	0.999996	1	1
COG1498	Protein implicated in ribosomal biogenesis, Nop56p homolog	0	0	0	0	1	NaN	0.999996	1	1
COG1501	Alpha-glucosidases, family 31 of glycosyl hydrolases	0.00153595	0.000175505	0.00126085	0.000193263	0.353805	0.372372	0.338384	0.850715	1
COG1502	Phosphatidylserine/phosphatidylglycerophosphate/cardiolipin synthases and related enzymes	0.00108817	8.0241e-05	0.00074288	0.000240117	0.230764	0.103898	0.135093	0.587657	1
COG1503	Peptide chain release factor 1 (eRF1)	0	0	0	0	1	NaN	0.999996	1	1
COG1504	Uncharacterized conserved protein	0	0	0	0	1	NaN	0.999996	1	1
COG1505	Serine proteases of the peptidase family S9A	4.47168e-05	1.8631e-05	2.73808e-05	2.73808e-05	0.677996	0.614049	0.609953	0.523757	1
COG1506	Dipeptidyl aminopeptidases/acylaminoacyl-peptidases	0.00125211	0.000170489	0.001524	0.00106276	0.841541	0.711636	0.698812	0.541071	1
COG1507	Uncharacterized conserved protein	3.26222e-05	9.63685e-06	0.000190234	0.000113527	0.223614	0.0531816	0.0122052	0.000129461	1
COG1508	DNA-directed RNA polymerase specialized sigma subunit, sigma54 homolog	0.000332363	3.92459e-05	0.000116427	4.99637e-05	0.00708441	0.00883113	0.0083027	0.0781401	0.171703
COG1509	Lysine 2,3-aminomutase	0.00020345	3.1558e-05	7.7297e-05	4.49317e-05	0.0436443	0.0460524	0.0519656	0.0998693	0.570619
COG1510	Predicted transcriptional regulators	0	0	0	0	1	NaN	0.999996	1	1
COG1511	Predicted membrane protein	0.000557846	5.2473e-05	0.00187025	0.000888435	0.190046	0.0399174	0.00390421	0.0033745	1
COG1512	Beta-propeller domains of methanol dehydrogenase type	0.000302687	4.07438e-05	0.000135656	7.70363e-05	0.0859265	0.0584935	0.0785177	0.155778	0.877944
COG1513	Cyanate lyase	0	0	0	0	1	NaN	0.999996	1	1
COG1514	2'-5' RNA ligase	2.86564e-05	1.39646e-05	8.04245e-05	6.00626e-05	0.497366	0.25786	0.259509	0.0958081	1
COG1515	Deoxyinosine 3'endonuclease (endonuclease V)	3.0109e-05	1.52191e-05	0.000111421	9.03252e-05	0.471499	0.211782	0.177002	0.035556	1
COG1516	Flagellin-specific chaperone FliS	6.15786e-05	1.5715e-05	7.87085e-05	4.63503e-05	0.781132	0.659367	0.607697	0.483279	1
COG1517	Uncharacterized protein predicted to be involved in DNA repair	0	0	0	0	1	NaN	0.999996	1	1
COG1518	Uncharacterized protein predicted to be involved in DNA repair	0.00041785	4.45165e-05	0.0012113	0.000901705	0.47606	0.191474	0.0562774	0.0684621	1
COG1519	3-deoxy-D-manno-octulosonic-acid transferase	0.000248529	4.03583e-05	8.30534e-05	4.94624e-05	0.0262631	0.0361773	0.0346677	0.334695	0.414568
COG1520	FOG: WD40-like repeat	0.000210325	2.42437e-05	0.000103644	6.55386e-05	0.16779	0.0808985	0.138535	0.600367	1
COG1521	Putative transcriptional regulator, homolog of Bvg accessory factor	0.000590023	4.18175e-05	0.000246461	0.000117167	0.0198944	0.00482186	0.0164875	0.428751	0.351172
COG1522	Transcriptional regulators	0.000801196	7.29596e-05	0.000619386	0.000182121	0.453	0.280403	0.309947	0.955772	1
COG1523	Type II secretory pathway, pullulanase PulA and related glycosidases	0.000645934	9.80747e-05	0.000912669	0.000239704	0.363877	0.236443	0.261237	0.417178	1
COG1524	Uncharacterized proteins of the AP superfamily	0.00032415	4.20432e-05	0.00027183	0.000112613	0.730657	0.595799	0.563979	0.935271	1
COG1525	Micrococcal nuclease (thermonuclease) homologs	2.00578e-05	1.07383e-05	9.8358e-05	6.52855e-05	0.299501	0.103982	0.105388	0.011388	1
COG1527	Archaeal/vacuolar-type H+-ATPase subunit C	0.000166509	2.29426e-05	0.000161667	3.5251e-05	0.928071	0.90952	0.876359	0.77698	1
COG1528	Ferritin-like protein	0.000291891	2.4788e-05	0.00021369	0.000119702	0.609487	0.373185	0.44701	0.910183	1
COG1529	Aerobic-type carbon monoxide dehydrogenase, large subunit CoxL/CutL homologs	0.000608642	5.90512e-05	0.000361927	0.000173602	0.237097	0.109801	0.154459	0.695543	1
COG1530	Ribonucleases G and E	0.000362634	3.42484e-05	0.000411455	5.14286e-05	0.523494	0.445951	0.462218	0.624469	1
COG1531	Uncharacterized protein conserved in archaea	0	0	0	0	1	NaN	0.999996	1	1
COG1532	Predicted RNA-binding protein	0	0	0	0	1	NaN	0.999996	1	1
COG1533	DNA repair photolyase	0.000444811	5.17756e-05	0.000197428	9.72446e-05	0.0478033	0.0313291	0.0452037	0.415448	0.59625
COG1535	Isochorismate hydrolase	9.84718e-07	9.84718e-07	4.2537e-05	3.22788e-05	0.259425	0.0655058	0.0146258	4.15117e-06	1
COG1536	Flagellar motor switch protein	9.03237e-05	2.02916e-05	8.02583e-05	4.74888e-05	0.877642	0.819826	0.868761	0.829092	1
COG1537	Predicted RNA-binding proteins	2.46179e-06	2.46179e-06	0	0	0.592119	0.528757	0.996929	0.120459	1
COG1538	Outer membrane protein	0.00354182	0.000509108	0.000656277	0.000390684	0.00139511	0.00481533	0.00255334	0.0530384	0.0601925
COG1539	Dihydroneopterin aldolase	0.000263194	3.43895e-05	0.000267061	7.89139e-05	0.97158	0.958388	0.933552	0.769677	1
COG1540	Uncharacterized proteins, homologs of lactam utilization protein B	8.66204e-05	2.04056e-05	0.000274387	7.22108e-05	0.0306727	0.00586209	0.0135399	0.0317735	0.457872
COG1541	Coenzyme F390 synthetase	0.000646587	5.26534e-05	0.000180352	5.87148e-05	0.000263851	0.000276008	0.000267737	0.128146	0.0313058
COG1542	Uncharacterized conserved protein	0	0	0	0	1	NaN	0.999996	1	1
COG1543	Uncharacterized conserved protein	1.62613e-05	1.09652e-05	6.75274e-06	6.75274e-06	0.551779	0.595291	0.518611	0.458923	1
COG1544	Ribosome-associated protein Y (PSrp-1)	0.000355792	4.19983e-05	0.000483215	0.000110558	0.344082	0.205907	0.232533	0.444072	1
COG1546	Uncharacterized protein (competence- and mitomycin-induced)	0.000298404	3.27419e-05	0.000388662	0.000147879	0.635529	0.410884	0.426462	0.484882	1
COG1548	Predicted transcriptional regulator/sugar kinase	0	0	0	0	1	NaN	0.999996	1	1
COG1549	Queuine tRNA-ribosyltransferases, contain PUA domain	0	0	0	0	1	NaN	0.999996	1	1
COG1552	Ribosomal protein L40E	0	0	0	0	1	NaN	0.999996	1	1
COG1553	Uncharacterized conserved protein involved in intracellular sulfur reduction	1.69546e-05	8.82608e-06	0.000160517	9.49775e-05	0.176988	0.0386099	0.0232673	8.29985e-05	1
COG1554	Trehalose and maltose hydrolases (possible phosphorylases)	0.00038521	6.03863e-05	0.000430307	0.000151877	0.827131	0.741058	0.734921	0.653717	1
COG1555	DNA uptake protein and related DNA-binding proteins	0.000463081	4.82186e-05	0.000298746	3.17213e-05	0.0171042	0.0555164	0.0376322	0.623364	0.31555
COG1556	Uncharacterized conserved protein	0.000118476	4.00766e-05	9.52358e-05	4.29581e-05	0.754269	0.736196	0.746124	0.924216	1
COG1558	Flagellar basal body rod protein	6.0489e-05	2.19114e-05	9.86823e-05	3.30037e-05	0.434517	0.354902	0.4314	0.278903	1
COG1560	Lauroyl/myristoyl acyltransferase	0.000218305	4.00413e-05	0.00030121	0.000159325	0.689404	0.494865	0.467433	0.418949	1
COG1561	Uncharacterized stress-induced protein	0.000396808	3.24947e-05	0.00015427	5.48386e-05	0.00377967	0.00209379	0.00396085	0.187552	0.108062
COG1562	Phytoene/squalene synthetase	0	0	3.37637e-06	3.37637e-06	0.046975	0.13941	0.99696	0	0.590575
COG1563	Predicted subunit of the Multisubunit Na+/H+ antiporter	1.03188e-05	5.50973e-06	0	0	0.0933209	0.248643	0.996689	0.0147316	0.934386
COG1564	Thiamine pyrophosphokinase	0.000425465	5.15691e-05	0.000517084	0.000308362	0.816594	0.669825	0.65038	0.556727	1
COG1565	Uncharacterized conserved protein	0	0	0	0	1	NaN	0.999996	1	1
COG1566	Multidrug resistance efflux pump	0.000309164	7.2577e-05	0.000850211	0.000561089	0.438373	0.171021	0.0919357	0.0291899	1
COG1568	Predicted methyltransferases	3.08576e-05	1.39658e-05	0	0	0.0508639	0.178501	0.996503	0.000550519	0.617389
COG1569	Predicted nucleic acid-binding protein, contains PIN domain	2.01081e-05	1.11422e-05	0	0	0.105141	0.265249	0.996576	0.00434695	1
COG1570	Exonuclease VII, large subunit	0.000543859	5.22069e-05	0.000383301	0.000100041	0.209765	0.143436	0.126596	0.660078	1
COG1571	Predicted DNA-binding protein containing a Zn-ribbon domain	0	0	0	0	1	NaN	0.999996	1	1
COG1572	Uncharacterized conserved protein	5.75856e-06	5.15949e-06	6.75274e-06	6.75274e-06	0.926916	0.913969	0.904501	0.835364	1
COG1573	Uracil-DNA glycosylase	0.000167417	2.83942e-05	0.000144204	5.29455e-05	0.759892	0.680377	0.633723	0.951706	1
COG1574	Predicted metal-dependent hydrolase with the TIM-barrel fold	0.000237643	2.65719e-05	0.000578179	8.51687e-05	0.00371371	0.000365377	0.000818542	0.042346	0.107578
COG1575	1,4-dihydroxy-2-naphthoate octaprenyltransferase	0.000277265	3.37074e-05	0.000326029	0.000141195	0.78978	0.644075	0.682027	0.607152	1
COG1576	Uncharacterized conserved protein	0.000437457	3.36112e-05	0.00031485	0.000118088	0.418452	0.20198	0.216184	0.669259	1
COG1577	Mevalonate kinase	3.97739e-06	3.97739e-06	0.00013553	9.59467e-05	0.22832	0.0524704	0.0396603	2.68523e-09	1
COG1578	Uncharacterized conserved protein	6.91998e-06	4.6396e-06	0	0	0.182592	0.352826	0.996758	0.0679608	1
COG1579	Zn-ribbon protein, possibly nucleic acid-binding	0.0001394	2.72165e-05	0	0	0.000616753	0.00669338	0.99625	1.30444e-07	0.0382627
COG1580	Flagellar basal body-associated protein	9.34291e-06	6.19132e-06	5.25277e-05	3.39771e-05	0.274204	0.0914637	0.130112	0.00104016	1
COG1583	Uncharacterized protein predicted to be involved in DNA repair (RAMP superfamily)	3.13701e-05	1.10931e-05	0	0	0.0176616	0.0929815	0.9965	0.000202249	0.321771
COG1584	Predicted membrane protein	1.33559e-05	7.16418e-06	7.88747e-05	5.85697e-05	0.329587	0.115799	0.0791885	0.000298982	1
COG1585	Membrane protein implicated in regulation of membrane protease activity	0.000103985	1.70272e-05	0.000113101	5.2935e-05	0.896517	0.833318	0.76376	0.682383	1
COG1587	Uroporphyrinogen-III synthase	0.000262654	3.59159e-05	0.000147741	5.20486e-05	0.102839	0.100798	0.101574	0.353601	1
COG1589	Cell division septal protein	8.05098e-05	1.3986e-05	0.000343867	5.19103e-05	0.000765169	3.17282e-05	0.000232982	0.000861427	0.0421009
COG1590	Uncharacterized conserved protein	0	0	0	0	1	NaN	0.999996	1	1
COG1591	Holliday junction resolvase - archaeal type	0	0	0	0	1	NaN	0.999996	1	1
COG1592	Rubrerythrin	0.00084514	6.00262e-05	0.000234678	9.40339e-05	0.000432057	0.000166971	0.000554246	0.290071	0.0351549
COG1593	TRAP-type C4-dicarboxylate transport system, large permease component	0.000807604	7.61773e-05	0.000367262	6.12095e-05	0.00136873	0.00437528	0.00116794	0.581262	0.0597395
COG1594	DNA-directed RNA polymerase, subunit M/Transcription elongation factor TFIIS	0	0	0	0	1	NaN	0.999996	1	1
COG1595	DNA-directed RNA polymerase specialized sigma subunit, sigma24 homolog	0.00527862	0.000445671	0.0012967	0.000345101	7.58573e-05	0.000175052	3.82103e-05	0.207141	0.0205724
COG1597	Sphingosine kinase and enzymes related to eukaryotic diacylglycerol kinase	0.000742999	6.34555e-05	0.000730977	0.000294733	0.974812	0.955193	0.92482	0.744183	1
COG1598	Uncharacterized conserved protein	0.000179966	4.13421e-05	7.95825e-05	4.93884e-05	0.159818	0.183457	0.138928	0.520548	1
COG1599	Single-stranded DNA-binding replication protein A (RPA), large (70 kD) subunit and related ssDNA-binding proteins	0	0	0	0	1	NaN	0.999996	1	1
COG1600	Uncharacterized Fe-S protein	0.000131098	1.90569e-05	0.000171773	6.95214e-05	0.654173	0.4553	0.431418	0.472932	1
COG1601	Translation initiation factor 2, beta subunit (eIF-2beta)/eIF-5 N-terminal domain	0	0	0	0	1	NaN	0.999996	1	1
COG1603	RNase P/RNase MRP subunit p30	0	0	0	0	1	NaN	0.999996	1	1
COG1604	Uncharacterized protein predicted to be involved in DNA repair (RAMP superfamily)	1.61486e-05	8.7808e-06	0	0	0.0987464	0.25676	0.996619	0.0210656	0.974892
COG1605	Chorismate mutase	0.000286544	2.88445e-05	0.000341822	7.8639e-05	0.597231	0.422514	0.490473	0.570553	1
COG1606	ATP-utilizing enzymes of the PP-loop superfamily	0.000178922	3.50093e-05	6.63749e-05	2.76075e-05	0.0292644	0.071975	0.0371354	0.34868	0.44875
COG1607	Acyl-CoA hydrolase	9.48183e-05	2.31689e-05	8.97606e-05	3.50042e-05	0.924845	0.905987	0.95482	0.777693	1
COG1608	Predicted archaeal kinase	0	0	0	0	1	NaN	0.999996	1	1
COG1609	Transcriptional regulators	0.00300162	0.000190809	0.0092422	0.00126551	0.00078166	1.41188e-05	3.08099e-06	0.0440797	0.042397
COG1610	Uncharacterized conserved protein	0.000243873	3.55079e-05	0.000131358	4.54027e-06	0.010742	0.0640562	0.0291049	0.592606	0.230165
COG1611	Predicted Rossmann fold nucleotide-binding protein	0.0003731	4.19699e-05	0.000842928	0.000364942	0.26274	0.0739833	0.0286203	0.127062	1
COG1612	Uncharacterized protein required for cytochrome oxidase assembly	5.03183e-06	5.03183e-06	3.42259e-05	3.42259e-05	0.495203	0.227344	0.259193	0.00438334	1
COG1613	ABC-type sulfate transport system, periplasmic component	6.53628e-05	1.85518e-05	0.000142796	5.99051e-05	0.279765	0.1291	0.141096	0.140029	1
COG1617	Uncharacterized conserved protein	0	0	0	0	1	NaN	0.999996	1	1
COG1618	Predicted nucleotide kinase	1.99753e-05	9.49949e-06	8.44093e-06	8.44093e-06	0.461832	0.47338	0.43357	0.448662	1
COG1619	Uncharacterized proteins, homologs of microcin C7 resistance protein MccF	0.000208543	2.46244e-05	0.000111735	4.88841e-05	0.112091	0.0724429	0.094984	0.544525	1
COG1620	L-lactate permease	0.000165481	3.83007e-05	0.000281674	9.96236e-05	0.339211	0.203269	0.221187	0.261679	1
COG1622	Heme/copper-type cytochrome/quinol oxidases, subunit 2	7.49171e-06	5.35484e-06	0.000135213	6.4789e-05	0.0777867	0.0105013	0.0211256	7.18199e-06	0.822213
COG1623	Predicted nucleic-acid-binding protein (contains the HHH domain)	1.11818e-05	1.11818e-05	3.06416e-05	1.8593e-05	0.467152	0.369091	0.530932	0.103501	1
COG1625	Fe-S oxidoreductase, related to NifB/MoaA family	0.000186968	1.5438e-05	6.2025e-05	4.29612e-05	0.0207057	0.00516522	0.0308182	0.19657	0.361283
COG1626	Neutral trehalase	9.6671e-05	1.59668e-05	0.000298182	0.000180382	0.328663	0.109821	0.0297713	0.0326741	1
COG1628	Uncharacterized conserved protein	0	0	0	0	1	NaN	0.999996	1	1
COG1629	Outer membrane receptor proteins, mostly Fe transport	0.0119968	0.00160437	0.00127601	0.000694579	0.000220976	0.00129855	0.000154986	0.00780119	0.0313058
COG1630	Uncharacterized protein conserved in archaea	0	0	0	0	1	NaN	0.999996	1	1
COG1633	Uncharacterized conserved protein	3.42579e-05	1.45503e-05	5.08767e-05	3.23673e-05	0.710895	0.593333	0.602374	0.388753	1
COG1634	Uncharacterized Rossmann fold enzyme	0	0	0	0	1	NaN	0.999996	1	1
COG1635	Flavoprotein involved in thiazole biosynthesis	6.69439e-05	1.47613e-05	0	0	0.00131266	0.0132134	0.996373	0.000126583	0.0576838
COG1636	Uncharacterized protein conserved in bacteria	0.000354665	2.38829e-05	3.37637e-05	3.37637e-05	2.96833e-05	1.10098e-05	0.00275341	0.00375426	0.0108366
COG1637	Predicted nuclease of the RecB family	2.23551e-05	8.36681e-06	0.000539127	0.000273173	0.0902965	0.0119601	0.00037681	2.35499e-08	0.910829
COG1638	TRAP-type C4-dicarboxylate transport system, periplasmic component	0.000827884	0.000118742	0.000392568	8.61625e-05	0.0141128	0.043052	0.0175472	0.347275	0.275067
COG1639	Predicted signal transduction protein	1.0021e-06	1.0021e-06	0	0	1	0.528757	0.997078	0.307692	1
COG1641	Uncharacterized conserved protein	0.000160419	2.92184e-05	8.32567e-05	4.2663e-05	0.182315	0.168125	0.167341	0.413094	1
COG1643	HrpA-like helicases	0.000149082	3.367e-05	0.000649445	9.45331e-05	0.000725591	5.41028e-05	0.00164058	0.00321004	0.0421009
COG1645	Uncharacterized Zn-finger containing protein	0	0	0	0	1	NaN	0.999996	1	1
COG1646	Predicted phosphate-binding enzymes, TIM-barrel fold	0	0	0	0	1	NaN	0.999996	1	1
COG1647	Esterase/lipase	2.80365e-05	9.07215e-06	4.92836e-05	1.78715e-05	0.351341	0.260196	0.358391	0.266127	1
COG1648	Siroheme synthase (precorrin-2 oxidase/ferrochelatase domain)	8.20034e-05	1.78935e-05	0.000119964	4.76586e-05	0.547703	0.370316	0.344716	0.355379	1
COG1649	Uncharacterized protein conserved in bacteria	0.000651767	0.000105017	0.000106843	4.30327e-05	0.000860815	0.00672519	0.000437551	0.0110833	0.0434618
COG1651	Protein-disulfide isomerase	2.369e-05	7.73733e-06	0.000284498	0.000180911	0.202153	0.0432009	0.00215194	2.84353e-06	1
COG1652	Uncharacterized protein containing LysM domain	0.000120523	1.85789e-05	8.69376e-05	3.40926e-05	0.483412	0.366898	0.42731	0.7198	1
COG1653	ABC-type sugar transport system, periplasmic component	0.00254022	0.000186629	0.00725858	0.00206195	0.0453	0.00447745	0.000425443	0.0220968	0.582636
COG1654	Biotin operon repressor	0.000152502	2.2103e-05	0.000122648	4.28638e-05	0.622135	0.50522	0.57119	0.852992	1
COG1656	Uncharacterized conserved protein	0	0	0	0	1	NaN	0.999996	1	1
COG1657	Squalene cyclase	0	0	0	0	1	NaN	0.999996	1	1
COG1658	Small primase-like proteins (Toprim domain)	8.15471e-05	2.39576e-05	3.74174e-05	2.1808e-05	0.231355	0.285322	0.228766	0.272344	1
COG1660	Predicted P-loop-containing kinase	0.000510179	7.57473e-05	0.000517067	5.43193e-05	0.953615	0.955752	0.970928	0.803336	1
COG1661	Predicted DNA-binding protein with PD1-like DNA-binding motif	0.000120735	2.02987e-05	7.67392e-05	3.2084e-05	0.308871	0.261153	0.289546	0.575008	1
COG1662	Transposase and inactivated derivatives, IS1 family	8.3701e-06	8.3701e-06	0.000129022	0.000115012	0.356711	0.128125	0.115549	1.54632e-07	1
COG1663	Tetraacyldisaccharide-1-P 4'-kinase	0.000212153	2.59669e-05	9.57565e-05	5.98974e-05	0.109083	0.057311	0.0993187	0.221983	1
COG1664	Integral membrane protein CcmA involved in cell shape determination	4.4654e-05	1.56997e-05	3.09964e-05	3.09964e-05	0.755941	0.668071	0.692947	0.676366	1
COG1665	Uncharacterized protein conserved in archaea	0	0	0	0	1	NaN	0.999996	1	1
COG1667	Uncharacterized protein conserved in archaea	0	0	0	0	1	NaN	0.999996	1	1
COG1668	ABC-type Na+ efflux pump, permease component	0.000120023	3.76139e-05	3.76182e-05	3.32494e-05	0.139831	0.207148	0.150287	0.0632399	1
COG1669	Predicted nucleotidyltransferases	0.000188238	3.24176e-05	0.000100528	2.06831e-05	0.0451318	0.116616	0.0642155	0.313761	0.58126
COG1670	Acetyltransferases, including N-acetylases of ribosomal proteins	0.00110292	0.00012558	0.00142273	0.000129961	0.111936	0.155263	0.191069	0.463154	1
COG1671	Uncharacterized protein conserved in bacteria	0.000198704	4.21507e-05	0.000164245	0.000100082	0.801782	0.709868	0.729895	0.855415	1
COG1672	Predicted ATPase (AAA+ superfamily)	0.000677136	4.79071e-05	0.000247815	9.56063e-05	0.00269458	0.000873444	0.00313269	0.0758174	0.0894295
COG1673	Uncharacterized protein conserved in archaea	0	0	0	0	1	NaN	0.999996	1	1
COG1674	DNA segregation ATPase FtsK/SpoIIIE and related proteins	0.000949774	7.94073e-05	0.00114179	0.000286016	0.605414	0.395365	0.407252	0.558726	1
COG1675	Transcription initiation factor IIE, alpha subunit	0	0	0	0	1	NaN	0.999996	1	1
COG1676	tRNA splicing endonuclease	0	0	0	0	1	NaN	0.999996	1	1
COG1677	Flagellar hook-basal body protein	4.28862e-05	1.60792e-05	4.92619e-05	3.21143e-05	0.887998	0.845215	0.820398	0.550124	1
COG1678	Putative transcriptional regulator	0.000110512	2.44854e-05	0.000125434	8.16952e-05	0.889981	0.818841	0.781835	0.583359	1
COG1679	Uncharacterized conserved protein	4.23568e-05	1.7542e-05	0	0	0.0359563	0.144585	0.99645	0.00596493	0.505624
COG1680	Beta-lactamase class C and other penicillin binding proteins	0.00081868	6.50608e-05	0.000701728	9.92781e-05	0.424722	0.342325	0.303321	0.878718	1
COG1681	Archaeal flagellins	0	0	0	0	1	NaN	0.999996	1	1
COG1682	ABC-type polysaccharide/polyol phosphate export systems, permease component	0.000366898	4.92427e-05	0.000691748	0.000365091	0.474349	0.205361	0.131935	0.228818	1
COG1684	Flagellar biosynthesis pathway, component FliR	4.1904e-05	1.28457e-05	0.000124432	4.43937e-05	0.108631	0.0342213	0.0574102	0.0636479	1
COG1685	Archaeal shikimate kinase	0	0	0	0	1	NaN	0.999996	1	1
COG1686	D-alanyl-D-alanine carboxypeptidase	0.00103339	9.5372e-05	0.000947467	0.000216305	0.773111	0.675492	0.704938	0.833018	1
COG1687	Predicted branched-chain amino acid permeases (azaleucine resistance)	0.00011355	2.47652e-05	0.000118721	5.78738e-05	0.948348	0.923494	0.982572	0.686752	1
COG1688	Uncharacterized protein predicted to be involved in DNA repair (RAMP superfamily)	0	0	0	0	1	NaN	0.999996	1	1
COG1689	Uncharacterized protein conserved in archaea	0	0	0	0	1	NaN	0.999996	1	1
COG1691	NCAIR mutase (PurE)-related proteins	0.000163143	2.89823e-05	9.26206e-05	4.69296e-05	0.262829	0.213543	0.222375	0.673618	1
COG1692	Uncharacterized protein conserved in bacteria	9.36744e-05	2.82008e-05	1.7113e-05	1.7113e-05	0.0419886	0.11452	0.0555247	0.107355	0.555569
COG1693	Uncharacterized protein conserved in archaea	0	0	0	0	1	NaN	0.999996	1	1
COG1694	Predicted pyrophosphatase	0.000212594	4.8994e-05	0.00035961	5.70811e-05	0.0793302	0.105696	0.184179	0.281446	0.832838
COG1695	Predicted transcriptional regulators	0.000687619	5.19416e-05	0.000591383	0.000182578	0.687804	0.505093	0.539662	0.934409	1
COG1696	Predicted membrane protein involved in D-alanine export	0.00076772	9.48297e-05	0.000252956	4.51932e-05	0.000765169	0.00527879	0.000457183	0.242739	0.0421009
COG1699	Uncharacterized protein conserved in bacteria	3.35146e-05	1.61705e-05	5.95178e-05	2.23922e-05	0.445477	0.382063	0.482217	0.280417	1
COG1700	Uncharacterized conserved protein	5.53405e-05	1.79159e-05	3.40961e-05	3.40961e-05	0.66168	0.554853	0.580898	0.684037	1
COG1701	Uncharacterized protein conserved in archaea	0	0	0	0	1	NaN	0.999996	1	1
COG1702	Phosphate starvation-inducible protein PhoH, predicted ATPase	0.000504404	5.81854e-05	0.000399012	4.90191e-05	0.222882	0.288986	0.241495	0.932809	1
COG1703	Putative periplasmic protein kinase ArgK and related GTPases of G3E family	0.000196151	3.99827e-05	8.00922e-05	4.93746e-05	0.101101	0.119933	0.107358	0.329264	0.990349
COG1705	Muramidase (flagellum-specific)	0.000237675	4.46721e-05	0.000226801	0.00016911	0.960482	0.933003	0.90836	0.845278	1
COG1706	Flagellar basal-body P-ring protein	1.83151e-05	1.14672e-05	8.50462e-05	5.04409e-05	0.257849	0.0926471	0.155815	0.00803567	1
COG1707	ACT domain-containing protein	0	0	0	0	1	NaN	0.999996	1	1
COG1708	Predicted nucleotidyltransferases	8.65911e-05	2.23475e-05	3.23801e-05	1.87287e-05	0.0957319	0.163581	0.118286	0.286291	0.953497
COG1709	Predicted transcriptional regulator	0	0	0	0	1	NaN	0.999996	1	1
COG1710	Uncharacterized protein conserved in archaea	0	0	0	0	1	NaN	0.999996	1	1
COG1711	Uncharacterized protein conserved in archaea	0	0	0	0	1	NaN	0.999996	1	1
COG1712	Predicted dinucleotide-utilizing enzyme	8.98161e-05	1.2944e-05	4.39682e-05	1.62067e-05	0.0507914	0.0648167	0.0638851	0.406614	0.617298
COG1713	Predicted HD superfamily hydrolase involved in NAD metabolism	0.000210624	4.12783e-05	8.66285e-05	2.60453e-05	0.0284992	0.0850805	0.0343357	0.273307	0.440576
COG1715	Restriction endonuclease	0.000104193	3.64271e-05	5.11078e-05	3.27294e-05	0.341338	0.392559	0.333238	0.425314	1
COG1716	FOG: FHA domain	0.000306289	4.40726e-05	0.000567507	0.000275667	0.448692	0.187397	0.136636	0.191826	1
COG1718	Serine/threonine protein kinase involved in cell cycle control	0	0	0	0	1	NaN	0.999996	1	1
COG1719	Predicted hydrocarbon binding protein (contains V4R domain)	4.7761e-06	4.7761e-06	0	0	0.38111	0.528757	0.996817	0.108201	1
COG1720	Uncharacterized conserved protein	0.000265672	3.79436e-05	0.000144922	5.83049e-05	0.119046	0.107304	0.107492	0.472822	1
COG1721	Uncharacterized conserved protein (some members contain a von Willebrand factor type A (vWA) domain)	0.000359531	5.09969e-05	0.000346524	0.000110254	0.933345	0.903257	0.870459	0.844886	1
COG1722	Exonuclease VII small subunit	8.97226e-05	3.7451e-05	0.000353215	0.000130681	0.0819951	0.0234356	0.0683918	0.005881	0.849666
COG1723	Uncharacterized conserved protein	0	0	0	0	1	NaN	0.999996	1	1
COG1724	Predicted periplasmic or secreted lipoprotein	4.61458e-05	1.76803e-05	0	0	0.0254617	0.117646	0.996436	0.000176582	0.407556
COG1725	Predicted transcriptional regulators	0.000819048	7.28569e-05	0.000779074	0.000381942	0.935983	0.882656	0.885326	0.88191	1
COG1726	Na+-transporting NADH:ubiquinone oxidoreductase, subunit NqrA	0.000196482	3.05812e-05	4.02953e-05	4.02953e-05	0.0117546	0.0137992	0.0364835	0.0282025	0.242162
COG1727	Ribosomal protein L18E	0	0	0	0	1	NaN	0.999996	1	1
COG1728	Uncharacterized protein conserved in bacteria	9.69968e-06	6.41669e-06	0	0	0.172631	0.346625	0.996698	0.0201423	1
COG1729	Uncharacterized protein conserved in bacteria	3.19455e-05	1.16992e-05	4.53321e-05	2.62202e-05	0.712273	0.593909	0.588147	0.411094	1
COG1730	Predicted prefoldin, molecular chaperone implicated in de novo protein folding	0	0	0	0	1	NaN	0.999996	1	1
COG1731	Archaeal riboflavin synthase	0	0	0	0	1	NaN	0.999996	1	1
COG1732	Periplasmic glycine betaine/choline-binding (lipo)protein of an ABC-type transport system (osmoprotectant binding protein)	6.87799e-05	2.65549e-05	0.000327873	4.89088e-05	0.00107849	0.000359237	0.022885	0.00104832	0.0522296
COG1733	Predicted transcriptional regulators	0.000577839	7.35778e-05	0.000616451	0.000139474	0.846584	0.792198	0.785063	0.729998	1
COG1734	DnaK suppressor protein	0.000156625	2.27284e-05	0.00016848	6.35117e-05	0.889463	0.827131	0.787858	0.729123	1
COG1735	Predicted metal-dependent hydrolase with the TIM-barrel fold	6.4464e-05	2.04956e-05	0.000283774	0.000153808	0.21305	0.0537387	0.0280548	0.00138426	1
COG1736	Diphthamide synthase subunit DPH2	0	0	0	0	1	NaN	0.999996	1	1
COG1737	Transcriptional regulators	0.000653767	8.36528e-05	0.00163802	0.000358607	0.0231035	0.00295953	0.00275747	0.0369356	0.385116
COG1738	Uncharacterized conserved protein	0.000155077	3.18013e-05	0.000154198	6.15233e-05	0.991768	0.989002	0.966544	0.833995	1
COG1739	Uncharacterized conserved protein	0.00038689	3.76532e-05	0.000306852	0.000100491	0.54766	0.369911	0.340884	0.788215	1
COG1740	Ni,Fe-hydrogenase I small subunit	7.49919e-05	1.70902e-05	7.52765e-05	6.5354e-05	0.997015	0.995442	0.972157	0.812934	1
COG1741	Pirin-related protein	0.000161287	3.10657e-05	0.000298603	0.000173327	0.529203	0.272266	0.204425	0.137925	1
COG1743	Adenine-specific DNA methylase containing a Zn-ribbon	2.61777e-05	1.21254e-05	3.39222e-05	3.39222e-05	0.864921	0.78941	0.832493	0.632948	1
COG1744	Uncharacterized ABC-type transport system, periplasmic component/surface lipoprotein	0.000507895	6.16303e-05	0.000339561	0.000142939	0.342182	0.223492	0.235926	0.537812	1
COG1746	tRNA nucleotidyltransferase (CCA-adding enzyme)	0	0	0	0	1	NaN	0.999996	1	1
COG1747	Uncharacterized N-terminal domain of the transcription elongation factor GreA	0	0	0	0	1	NaN	0.999996	1	1
COG1748	Saccharopine dehydrogenase and related proteins	0.000492583	5.71644e-05	6.32752e-05	2.79434e-05	0.000122031	0.000561933	6.01472e-05	0.000607398	0.0251808
COG1749	Flagellar hook protein FlgE	6.65944e-05	1.56992e-05	0.000133893	7.74378e-05	0.491146	0.240722	0.18303	0.0906205	1
COG1750	Archaeal serine proteases	0	0	0	0	1	NaN	0.999996	1	1
COG1751	Uncharacterized conserved protein	1.06014e-05	7.02569e-06	0	0	0.175296	0.347446	0.996685	0.0146108	1
COG1752	Predicted esterase of the alpha-beta hydrolase superfamily	0.000574528	6.65893e-05	0.00019263	9.13097e-05	0.00730538	0.00766618	0.00922211	0.363994	0.174666
COG1753	Uncharacterized conserved protein	0	0	0	0	1	NaN	0.999996	1	1
COG1754	Uncharacterized C-terminal domain of topoisomerase IA	0.00012704	1.32057e-05	0.000293372	0.000179469	0.453999	0.174091	0.0703678	0.142133	1
COG1756	Uncharacterized conserved protein	0	0	0	0	1	NaN	0.999996	1	1
COG1757	Na+/H+ antiporter	0.00108036	8.438e-05	0.000394525	8.06913e-05	0.00026715	0.000453437	0.000141628	0.374148	0.0313058
COG1758	DNA-directed RNA polymerase, subunit K/omega	6.61736e-05	1.66911e-05	0.000336683	0.000115268	0.0418864	0.00476541	0.00331901	0.00964735	0.555285
COG1759	ATP-utilizing enzymes of ATP-grasp superfamily (probably carboligases)	0	0	0	0	1	NaN	0.999996	1	1
COG1760	L-serine deaminase	0.000850476	9.5701e-05	0.000688861	0.000188548	0.537198	0.410296	0.419881	0.950012	1
COG1761	DNA-directed RNA polymerase, subunit L	0	0	0	0	1	NaN	0.999996	1	1
COG1762	Phosphotransferase system mannitol/fructose-specific IIA domain (Ntr-type)	0.0004362	7.74404e-05	0.00169404	0.000184195	0.000191292	1.08734e-05	0.000499469	0.0217278	0.0292861
COG1763	Molybdopterin-guanine dinucleotide biosynthesis protein	7.86885e-05	2.35816e-05	0.000143146	7.15894e-05	0.489537	0.288028	0.295183	0.250903	1
COG1764	Predicted redox protein, regulator of disulfide bond formation	1.79896e-05	1.20065e-05	0.000231749	6.41254e-05	0.00857187	0.000529442	0.0292867	0.00011373	0.195586
COG1765	Predicted redox protein, regulator of disulfide bond formation	9.38195e-05	1.93253e-05	0.000396595	9.98831e-05	0.0138885	0.00112816	0.00169993	0.0140378	0.272328
COG1766	Flagellar biosynthesis/type III secretory pathway lipoprotein	6.85767e-05	1.5003e-05	0.000143595	6.31421e-05	0.310055	0.1301	0.110257	0.170884	1
COG1767	Triphosphoribosyl-dephospho-CoA synthetase	7.90042e-05	9.41537e-06	0.000226361	9.36922e-05	0.158334	0.0332212	0.00705473	0.0647883	1
COG1768	Predicted phosphohydrolase	0.000181214	4.98269e-05	4.9493e-05	1.65592e-05	0.0302967	0.11645	0.0262675	0.188373	0.456291
COG1769	Uncharacterized protein predicted to be involved in DNA repair (RAMP superfamily)	0	0	0	0	1	NaN	0.999996	1	1
COG1770	Protease II	2.7156e-05	1.08906e-05	0.000275294	6.44588e-05	0.00384234	0.000145072	0.00276889	0.000166042	0.109195
COG1773	Rubredoxin	0.000273568	3.88185e-05	0.000131233	6.77641e-05	0.101939	0.0781458	0.0935774	0.486614	0.996498
COG1774	Uncharacterized homolog of PSP1	0.000523123	3.83859e-05	9.71551e-05	4.1185e-05	3.62796e-05	3.80387e-05	7.1457e-05	0.0683663	0.0127542
COG1775	Benzoyl-CoA reductase/2-hydroxyglutaryl-CoA dehydratase subunit, BcrC/BadD/HgdB	0.00037771	4.66235e-05	0.000176458	8.42606e-05	0.0619292	0.0451495	0.0570772	0.429354	0.703145
COG1776	Chemotaxis protein CheC, inhibitor of MCP methylation	9.95877e-05	1.747e-05	5.16191e-05	2.9064e-05	0.212453	0.167612	0.192663	0.553049	1
COG1777	Predicted transcriptional regulators	0	0	0	0	1	NaN	0.999996	1	1
COG1778	Low specificity phosphatase (HAD superfamily)	0.000278616	3.78492e-05	0.000103506	6.6589e-05	0.0446733	0.0325803	0.0535216	0.278935	0.579285
COG1780	Protein involved in ribonucleotide reduction	4.16104e-05	1.50271e-05	0.000384697	0.000118374	0.0163357	0.00104655	0.00248997	0.000112298	0.308577
COG1782	Predicted metal-dependent RNase, consists of a metallo-beta-lactamase domain and an RNA-binding KH domain	4.93492e-06	3.09391e-06	0	0	0.150705	0.321778	0.99681	0.114463	1
COG1783	Phage terminase large subunit	0.000231968	4.0559e-05	0.000138248	5.11611e-05	0.203908	0.20846	0.186147	0.620312	1
COG1784	Predicted membrane protein	0	0	0	0	1	NaN	0.999996	1	1
COG1787	Predicted endonuclease distantly related to archaeal Holliday junction resolvase and Mrr-like restriction enzymes	3.60097e-05	1.13347e-05	0	0	0.0100725	0.0631617	0.996476	0.00121615	0.220804
COG1788	Acyl CoA:acetate/3-ketoacid CoA transferase, alpha subunit	7.2061e-05	2.42997e-05	0.000150526	9.08322e-05	0.499883	0.274068	0.267378	0.13685	1
COG1791	Uncharacterized conserved protein, contains double-stranded beta-helix domain	0	0	3.71957e-05	3.71957e-05	0.38111	0.13941	0.996606	8.5825e-07	1
COG1792	Cell shape-determining protein	0.000471746	3.67503e-05	0.000192169	7.07577e-05	0.00599272	0.00251828	0.00493578	0.280884	0.151854
COG1793	ATP-dependent DNA ligase	1.38191e-05	7.24365e-06	1.01291e-05	1.01291e-05	0.814443	0.778884	0.799759	0.734223	1
COG1794	Aspartate racemase	0.000137289	1.64179e-05	0.00027963	4.94255e-05	0.0207915	0.0044796	0.00649992	0.139686	0.36145
COG1795	Uncharacterized conserved protein	0	0	0	0	1	NaN	0.999996	1	1
COG1796	DNA polymerase IV (family X)	0	0	0	0	1	NaN	0.999996	1	1
COG1797	Cobyrinic acid a,c-diamide synthase	0.00045431	3.92303e-05	9.22795e-05	3.28208e-05	6.9261e-05	0.000142272	5.49985e-05	0.0332804	0.0193359
COG1798	Diphthamide biosynthesis methyltransferase	0	0	0	0	1	NaN	0.999996	1	1
COG1799	Uncharacterized protein conserved in bacteria	0.000173885	3.54772e-05	0.000322697	0.000108724	0.253334	0.116535	0.136146	0.179627	1
COG1800	Predicted transglutaminase-like proteases	0	0	0	0	1	NaN	0.999996	1	1
COG1802	Transcriptional regulators	0.000562146	8.20958e-05	0.00060633	0.000270841	0.901359	0.838509	0.817747	0.702676	1
COG1804	Predicted acyl-CoA transferases/carnitine dehydratase	0.000264287	4.6425e-05	0.000293895	8.30966e-06	0.617135	0.687028	0.712901	0.669327	1
COG1805	Na+-transporting NADH:ubiquinone oxidoreductase, subunit NqrB	0.000167102	2.6893e-05	4.81828e-05	4.59595e-05	0.048829	0.0378906	0.0810887	0.0918822	0.60428
COG1807	4-amino-4-deoxy-L-arabinose transferase and related glycosyltransferases of PMT family	0.000186935	4.13196e-05	0.000127943	8.22311e-05	0.608662	0.486101	0.505261	0.686962	1
COG1808	Predicted membrane protein	0.000168081	1.77508e-05	0	0	9.89443e-06	7.11621e-05	0.996219	5.44429e-07	0.00722442
COG1809	Uncharacterized conserved protein	0	0	0	0	1	NaN	0.999996	1	1
COG1810	Uncharacterized protein conserved in archaea	0	0	0	0	1	NaN	0.999996	1	1
COG1811	Uncharacterized membrane protein, possible Na+ channel or pump	0.000152826	3.50102e-05	0.000131301	5.87139e-05	0.803302	0.74762	0.777946	0.907971	1
COG1812	Archaeal S-adenosylmethionine synthetase	0	0	0	0	1	NaN	0.999996	1	1
COG1813	Predicted transcription factor, homolog of eukaryotic MBF1	0	0	0	0	1	NaN	0.999996	1	1
COG1814	Uncharacterized membrane protein	5.67232e-05	2.80771e-05	6.52224e-05	3.77484e-05	0.886003	0.866097	0.862247	0.594831	1
COG1815	Flagellar basal body protein	2.93689e-05	2.37363e-05	5.8727e-05	3.95609e-05	0.611532	0.519669	0.59909	0.129463	1
COG1816	Adenosine deaminase	0.000183909	2.63328e-05	0.000277525	4.39386e-05	0.100884	0.0823836	0.11537	0.300718	0.989302
COG1817	Uncharacterized protein conserved in archaea	0	0	0	0	1	NaN	0.999996	1	1
COG1819	Glycosyl transferases, related to UDP-glucuronosyltransferase	0.000173781	1.92691e-05	4.9493e-05	1.65592e-05	0.000771765	0.00223836	0.00128155	0.0538394	0.0421009
COG1820	N-acetylglucosamine-6-phosphate deacetylase	0.000649845	6.28351e-05	0.000790223	9.44815e-05	0.278624	0.241338	0.273064	0.549348	1
COG1821	Predicted ATP-utilizing enzyme (ATP-grasp superfamily)	0	0	0	0	1	NaN	0.999996	1	1
COG1822	Predicted archaeal membrane protein	0	0	0	0	1	NaN	0.999996	1	1
COG1823	Predicted Na+/dicarboxylate symporter	2.0657e-05	8.70838e-06	0.000273282	9.55538e-05	0.0246041	0.00172672	0.00222771	7.13503e-08	0.3999
COG1824	Permease, similar to cation transporters	0	0	0	0	1	NaN	0.999996	1	1
COG1825	Ribosomal protein L25 (general stress protein Ctc)	0.000235239	4.02534e-05	0.000308724	4.7647e-05	0.301599	0.30791	0.368031	0.44103	1
COG1826	Sec-independent protein secretion pathway components	9.56113e-05	2.52505e-05	0.000192962	9.28827e-05	0.372674	0.192038	0.181608	0.0881794	1
COG1828	Phosphoribosylformylglycinamidine (FGAM) synthase, PurS component	0	0	5.10352e-05	3.25048e-05	0.156866	0.0294258	0.994617	2.2244e-09	1
COG1829	Predicted archaeal kinase (sugar kinase superfamily)	0	0	0	0	1	NaN	0.999996	1	1
COG1830	DhnA-type fructose-1,6-bisphosphate aldolase and related enzymes	0.000247155	4.04551e-05	0.000183337	0.000106231	0.655727	0.498521	0.529545	0.923737	1
COG1831	Predicted metal-dependent hydrolase (urease superfamily)	0	0	0	0	1	NaN	0.999996	1	1
COG1832	Predicted CoA-binding protein	0	0	4.78783e-05	2.99487e-05	0.149574	0.0271348	0.994583	3.95596e-06	1
COG1833	Uncharacterized conserved protein	0	0	0	0	1	NaN	0.999996	1	1
COG1834	N-Dimethylarginine dimethylaminohydrolase	4.12735e-05	1.15535e-05	4.81094e-05	3.00001e-05	0.86628	0.796597	0.735924	0.595825	1
COG1835	Predicted acyltransferases	0.000342859	4.58878e-05	0.000511146	0.000255928	0.605196	0.358061	0.316377	0.377512	1
COG1836	Predicted membrane protein	0	0	0	0	1	NaN	0.999996	1	1
COG1837	Predicted RNA-binding protein (contains KH domain)	0.000164525	2.57609e-05	0.000436358	0.000347968	0.529708	0.246275	0.112724	0.0956421	1
COG1838	Tartrate dehydratase beta subunit/Fumarate hydratase class I, C-terminal domain	0.000523558	5.48687e-05	0.000530129	0.000237899	0.982873	0.970124	0.9531	0.71974	1
COG1839	Uncharacterized conserved protein	0	0	0	0	1	NaN	0.999996	1	1
COG1840	ABC-type Fe3+ transport system, periplasmic component	0.000264178	5.57639e-05	0.000665383	0.000234896	0.135346	0.0383198	0.0377828	0.103893	1
COG1841	Ribosomal protein L30/L7E	0.000338083	3.4946e-05	0.000330662	3.01808e-05	0.898552	0.898709	0.839651	0.753005	1
COG1842	Phage shock protein A (IM30), suppresses sigma54-dependent transcription	1.43119e-05	7.39728e-06	0.000235768	8.12333e-05	0.021461	0.0013905	0.00413949	2.75422e-05	0.368763
COG1843	Flagellar hook capping protein	4.26843e-05	1.24496e-05	4.92619e-05	3.21143e-05	0.880063	0.817287	0.775277	0.609237	1
COG1845	Heme/copper-type cytochrome/quinol oxidase, subunit 3	1.3258e-06	1.3258e-06	6.49912e-05	2.53683e-05	0.0304089	0.00221068	0.00923536	1.30121e-05	0.456708
COG1846	Transcriptional regulators	0.0014562	0.000120267	0.0022283	0.000160439	0.00352242	0.00370784	0.00883122	0.353804	0.103513
COG1847	Predicted RNA-binding protein	0.000396496	4.3457e-05	0.00040648	0.000113363	0.948275	0.920363	0.982082	0.732556	1
COG1848	Predicted nucleic acid-binding protein, contains PIN domain	5.66547e-06	5.66547e-06	0	0	0.38111	0.528757	0.996793	0.0792199	1
COG1849	Uncharacterized protein conserved in archaea	2.20966e-06	2.20966e-06	0	0	0.592119	0.528757	0.996941	0.645587	1
COG1850	Ribulose 1,5-bisphosphate carboxylase, large subunit	3.4059e-05	1.52877e-05	2.36346e-05	2.36346e-05	0.769183	0.714741	0.732864	0.888886	1
COG1852	Uncharacterized conserved protein	2.46753e-05	1.42174e-05	2.36346e-05	2.36346e-05	0.976055	0.969282	0.980068	0.861125	1
COG1853	Conserved protein/domain typically associated with flavoprotein oxygenases, DIM6/NTAB family	0.000908411	4.06408e-05	0.000471894	0.000157681	0.0228396	0.00332577	0.0132135	0.529233	0.384923
COG1855	ATPase (PilT family)	0	0	0	0	1	NaN	0.999996	1	1
COG1856	Uncharacterized homolog of biotin synthetase	0	0	0	0	1	NaN	0.999996	1	1
COG1857	Uncharacterized protein predicted to be involved in DNA repair	1.11818e-05	1.11818e-05	0	0	0.38111	0.528757	0.996677	0.0328266	1
COG1858	Cytochrome c peroxidase	9.02741e-05	2.08468e-05	0.000120554	8.1969e-05	0.775951	0.627235	0.585996	0.439122	1
COG1859	RNA:NAD 2'-phosphotransferase	2.82393e-05	1.01113e-05	6.61438e-05	4.77691e-05	0.531139	0.285615	0.241968	0.119637	1
COG1861	Spore coat polysaccharide biosynthesis protein F, CMP-KDO synthetase homolog	5.70929e-05	1.86662e-05	3.09964e-05	3.09964e-05	0.562165	0.467433	0.48968	0.612605	1
COG1862	Preprotein translocase subunit YajC	0.000221233	2.52307e-05	0.000199211	2.78039e-05	0.641139	0.614889	0.545739	0.889123	1
COG1863	Multisubunit Na+/H+ antiporter, MnhE subunit	4.78558e-06	4.78558e-06	0	0	0.38111	0.528757	0.996817	0.113646	1
COG1864	DNA/RNA endonuclease G, NUC1	0.000214595	2.58417e-05	2.04244e-05	1.62377e-05	0.000181398	0.000615305	0.000750444	0.00844567	0.0282265
COG1865	Uncharacterized conserved protein	2.323e-05	1.26438e-05	4.74541e-05	3.19258e-05	0.571311	0.40409	0.451077	0.160768	1
COG1866	Phosphoenolpyruvate carboxykinase (ATP)	0.000506249	4.40383e-05	0.000285273	0.000134659	0.159534	0.0660424	0.109095	0.525534	1
COG1867	N2,N2-dimethylguanosine tRNA methyltransferase	0	0	0	0	1	NaN	0.999996	1	1
COG1868	Flagellar motor switch protein	7.14062e-05	2.60875e-05	0.00010232	2.05299e-05	0.450991	0.4784	0.54133	0.401431	1
COG1869	ABC-type ribose transport system, auxiliary component	5.53509e-05	2.37672e-05	0.000123552	5.35969e-05	0.307262	0.197042	0.270924	0.104989	1
COG1871	Chemotaxis protein; stimulates methylation of MCP proteins	7.25305e-05	1.64617e-05	5.9391e-05	4.13916e-05	0.815288	0.724008	0.763541	0.882003	1
COG1872	Uncharacterized conserved protein	5.19947e-06	5.19947e-06	9.26569e-05	5.72954e-05	0.169445	0.0368871	0.0849691	2.85523e-06	1
COG1873	Uncharacterized conserved protein	9.22848e-05	2.42857e-05	3.06919e-05	1.77217e-05	0.0662069	0.142189	0.0855824	0.17864	0.73415
COG1874	Beta-galactosidase	0.000850818	0.000103229	0.00149804	0.000561545	0.320309	0.122211	0.0874377	0.214269	1
COG1875	Predicted ATPase related to phosphate starvation-inducible protein PhoH	0.000199846	3.60657e-05	3.37637e-06	3.37637e-06	0.000435355	0.00462675	0.00040398	3.36953e-05	0.0351549
COG1877	Trehalose-6-phosphatase	2.71887e-05	8.89689e-06	0.000115277	6.23728e-05	0.218743	0.0571506	0.0308832	0.00483556	1
COG1878	Predicted metal-dependent hydrolase	0.000192695	3.49877e-05	5.08767e-05	3.23673e-05	0.0139149	0.0313187	0.0205845	0.07623	0.272328
COG1879	ABC-type sugar transport system, periplasmic component	0.00115137	7.01011e-05	0.00193069	0.000799804	0.431344	0.15725	0.0857743	0.240427	1
COG1880	CO dehydrogenase/acetyl-CoA synthase epsilon subunit	0	0	0	0	1	NaN	0.999996	1	1
COG1881	Phospholipid-binding protein	5.24564e-05	1.54941e-05	0.000359439	4.2387e-05	0.000108839	3.2757e-06	0.00113057	0.00013273	0.0234794
COG1882	Pyruvate-formate lyase	0.00112223	6.99765e-05	0.00149177	0.000426108	0.489111	0.226232	0.180811	0.449055	1
COG1886	Flagellar motor switch/type III secretory pathway protein	4.40547e-05	1.18518e-05	7.33166e-05	3.32696e-05	0.502841	0.313668	0.294716	0.232617	1
COG1887	Putative glycosyl/glycerophosphate transferases involved in teichoic acid biosynthesis TagF/TagB/EpsJ/RodC	0.000282236	5.28858e-05	0.000134592	8.65958e-05	0.197186	0.15931	0.168045	0.290161	1
COG1888	Uncharacterized protein conserved in archaea	0	0	0	0	1	NaN	0.999996	1	1
COG1889	Fibrillarin-like rRNA methylase	0	0	0	0	1	NaN	0.999996	1	1
COG1891	Uncharacterized protein conserved in archaea	5.01051e-06	5.01051e-06	0	0	0.38111	0.528757	0.996811	0.032856	1
COG1892	Uncharacterized protein conserved in archaea	0	0	0	0	1	NaN	0.999996	1	1
COG1893	Ketopantoate reductase	0.000522909	6.34587e-05	0.000339956	9.49308e-05	0.14871	0.137816	0.132695	0.56077	1
COG1894	NADH:ubiquinone oxidoreductase, NADH-binding (51 kD) subunit	0.000253924	2.0795e-05	0.000267785	6.00458e-05	0.86283	0.784331	0.740128	0.741709	1
COG1895	Uncharacterized conserved protein related to C-terminal domain of eukaryotic chaperone, SACSIN	6.5293e-05	2.42567e-05	0	0	0.0222559	0.107774	0.99638	2.12892e-05	0.379267
COG1896	Predicted hydrolases of HD superfamily	0.000332563	4.35955e-05	0.00032385	0.000101312	0.950396	0.926562	0.939528	0.862196	1
COG1897	Homoserine trans-succinylase	0.000535321	2.05835e-05	0.000339812	6.58941e-05	0.0174802	0.00318613	0.00593014	0.503706	0.319995
COG1898	dTDP-4-dehydrorhamnose 3,5-epimerase and related enzymes	0.000602679	6.15652e-05	0.000760001	0.000444156	0.780462	0.603712	0.570231	0.499034	1
COG1899	Deoxyhypusine synthase	0	0	0	0	1	NaN	0.999996	1	1
COG1901	Uncharacterized conserved protein	0	0	0	0	1	NaN	0.999996	1	1
COG1902	NADH:flavin oxidoreductases, Old Yellow Enzyme family	0.000646296	2.60302e-05	0.000812226	9.49111e-05	0.130389	0.0411442	0.0308762	0.499379	1
COG1904	Glucuronate isomerase	0.000426396	4.25787e-05	0.000358547	9.57693e-05	0.605087	0.461263	0.47119	0.87172	1
COG1905	NADH:ubiquinone oxidoreductase 24 kD subunit	0.000205599	3.48166e-05	0.000167761	3.66678e-05	0.54638	0.529399	0.479261	0.829539	1
COG1907	Predicted archaeal sugar kinases	0	0	0	0	1	NaN	0.999996	1	1
COG1910	Periplasmic molybdate-binding protein/domain	1.94029e-05	7.18421e-06	3.42259e-05	3.42259e-05	0.737267	0.551915	0.502956	0.214338	1
COG1911	Ribosomal protein L30E	0	0	0	0	1	NaN	0.999996	1	1
COG1913	Predicted Zn-dependent proteases	0	0	0	0	1	NaN	0.999996	1	1
COG1914	Mn2+ and Fe2+ transporters of the NRAMP family	0.000305355	2.31644e-05	0.000986567	0.000446409	0.168578	0.0344999	0.00287678	0.0549349	1
COG1915	Uncharacterized conserved protein	5.96675e-05	1.78294e-05	0	0	0.00766818	0.052159	0.996392	0.00394602	0.181965
COG1916	Uncharacterized homolog of PrgY (pheromone shutdown protein)	4.78558e-06	4.78558e-06	0	0	0.38111	0.528757	0.996817	0.258123	1
COG1917	Uncharacterized conserved protein, contains double-stranded beta-helix domain	0.00074517	4.24936e-05	0.000465661	0.000101847	0.0288357	0.0108903	0.0104947	0.829107	0.444329
COG1920	Uncharacterized conserved protein	0	0	0	0	1	NaN	0.999996	1	1
COG1921	Selenocysteine synthase [seryl-tRNASer selenium transferase]	7.92303e-05	1.82337e-05	0.000286173	0.000101426	0.0709397	0.0126299	0.0103962	0.0343578	0.770123
COG1922	Teichoic acid biosynthesis proteins	0.000252925	2.61461e-05	0.000149248	7.3017e-05	0.23997	0.117056	0.165406	0.748662	1
COG1923	Uncharacterized host factor I protein	7.52081e-05	2.19438e-05	5.57935e-05	5.57935e-05	0.797603	0.697341	0.72071	0.85716	1
COG1924	Activator of 2-hydroxyglutaryl-CoA dehydratase (HSP70-class ATPase domain)	0.000511517	4.01836e-05	0.00038459	7.07399e-05	0.159462	0.123426	0.111894	0.960549	1
COG1925	Phosphotransferase system, HPr-related proteins	0.000406688	4.62355e-05	0.000636572	0.000150681	0.196206	0.0780308	0.0730915	0.337377	1
COG1926	Predicted phosphoribosyltransferases	0	0	0	0	1	NaN	0.999996	1	1
COG1928	Dolichyl-phosphate-mannose--protein O-mannosyl transferase	8.52578e-05	1.90275e-05	6.5537e-05	2.51779e-05	0.618771	0.565091	0.466498	0.870233	1
COG1931	Uncharacterized protein conserved in archaea	2.46179e-06	2.46179e-06	0	0	0.592119	0.528757	0.996929	0.124419	1
COG1932	Phosphoserine aminotransferase	0.000540693	5.24084e-05	0.000399035	4.9609e-05	0.0782319	0.129276	0.100441	0.903723	0.824166
COG1933	Archaeal DNA polymerase II, large subunit	0	0	0	0	1	NaN	0.999996	1	1
COG1934	Uncharacterized protein conserved in bacteria	4.92359e-06	4.92359e-06	9.73713e-05	4.04029e-05	0.0458145	0.00502939	0.0693719	3.00978e-05	0.585722
COG1936	Predicted nucleotide kinase (related to CMP and AMP kinases)	5.91513e-05	1.69778e-05	0	0	0.00620381	0.0446069	0.996396	0.00096096	0.156115
COG1937	Uncharacterized protein conserved in bacteria	0.000304198	4.17995e-05	0.000417816	5.40288e-05	0.135092	0.146193	0.19134	0.43607	1
COG1938	Archaeal enzymes of ATP-grasp superfamily	0	0	0	0	1	NaN	0.999996	1	1
COG1939	Uncharacterized protein conserved in bacteria	0.000303871	4.52296e-05	6.65095e-05	4.67906e-05	0.00480209	0.00933256	0.0106472	0.108215	0.12995
COG1940	Transcriptional regulator/sugar kinase	0.00192244	7.50792e-05	0.00353642	0.000341296	0.00116424	3.69611e-05	2.10058e-05	0.214839	0.0545924
COG1941	Coenzyme F420-reducing hydrogenase, gamma subunit	1.96944e-06	1.96944e-06	0	0	0.583403	0.528757	0.996965	0.243306	1
COG1942	Uncharacterized protein, 4-oxalocrotonate tautomerase homolog	3.5504e-05	1.11357e-05	0.000171763	0.000107522	0.27051	0.0761918	0.0248674	0.00625726	1
COG1943	Transposase and inactivated derivatives	0.000536551	7.39445e-05	0.000562096	0.000126719	0.890535	0.857273	0.864525	0.720678	1
COG1944	Uncharacterized conserved protein	2.71378e-05	1.11427e-05	9.23802e-05	5.92506e-05	0.341918	0.139369	0.121194	0.0289303	1
COG1946	Acyl-CoA thioesterase	5.24247e-05	1.69382e-05	0.000200507	2.83698e-05	0.00143799	0.00065641	0.0203319	0.0158303	0.061518
COG1947	4-diphosphocytidyl-2C-methyl-D-erythritol 2-phosphate synthase	0.000473527	4.19179e-05	0.000711995	0.000437232	0.666835	0.415602	0.337253	0.355008	1
COG1948	ERCC4-type nuclease	0	0	0	0	1	NaN	0.999996	1	1
COG1949	Oligoribonuclease (3'->5' exoribonuclease)	5.61951e-05	1.71117e-05	0.000300761	9.39594e-05	0.0275692	0.0030087	0.00625576	0.00236265	0.428992
COG1950	Predicted membrane protein	2.04996e-05	8.12939e-06	0.000171283	8.75695e-05	0.124175	0.0215969	0.00899622	0.000274731	1
COG1952	Preprotein translocase subunit SecB	1.52097e-05	7.6573e-06	8.66238e-05	6.60607e-05	0.345715	0.125761	0.0749155	0.00304094	1
COG1953	Cytosine/uracil/thiamine/allantoin permeases	2.13134e-05	7.76884e-06	0.000110351	6.12391e-05	0.201639	0.0490341	0.0248763	0.00394653	1
COG1954	Glycerol-3-phosphate responsive antiterminator (mRNA-binding)	5.53703e-05	1.6847e-05	0.00022394	0.000123753	0.235517	0.0639979	0.0327465	0.00809428	1
COG1955	Archaeal flagella assembly protein J	0	0	0	0	1	NaN	0.999996	1	1
COG1956	GAF domain-containing protein	0.000176017	3.4747e-05	0.000140759	5.26778e-05	0.657425	0.5859	0.584847	0.917352	1
COG1957	Inosine-uridine nucleoside N-ribohydrolase	0.000397143	6.06978e-05	0.0009404	0.000126026	0.00333112	0.000993579	0.00527941	0.0802542	0.100238
COG1958	Small nuclear ribonucleoprotein (snRNP) homolog	0	0	0	0	1	NaN	0.999996	1	1
COG1959	Predicted transcriptional regulator	0.000526191	4.86335e-05	0.000485524	8.3427e-05	0.739031	0.664589	0.71573	0.914145	1
COG1960	Acyl-CoA dehydrogenases	0.000788106	8.37341e-05	0.000648898	0.000196312	0.602181	0.451171	0.465956	0.925379	1
COG1961	Site-specific recombinases, DNA invertase Pin homologs	0.00586908	0.00041214	0.00182748	0.00057397	0.000316622	0.000174076	0.000300267	0.115193	0.0345443
COG1962	Tetrahydromethanopterin S-methyltransferase, subunit H	0	0	0	0	1	NaN	0.999996	1	1
COG1964	Predicted Fe-S oxidoreductases	9.61879e-06	6.38908e-06	2.56232e-05	2.13599e-05	0.563949	0.356253	0.400232	0.0861129	1
COG1966	Carbon starvation protein, predicted membrane protein	0.00071797	8.85705e-05	0.000422692	0.000147144	0.123261	0.100209	0.0990361	0.508306	1
COG1967	Predicted membrane protein	0	0	0	0	1	NaN	0.999996	1	1
COG1969	Ni,Fe-hydrogenase I cytochrome b subunit	2.6762e-05	1.12434e-05	5.4117e-05	3.31076e-05	0.527848	0.333263	0.372107	0.134316	1
COG1971	Predicted membrane protein	0.000319611	3.59829e-05	0.000346575	5.82093e-05	0.755268	0.692022	0.683779	0.694974	1
COG1973	Hydrogenase maturation factor	0	0	0	0	1	NaN	0.999996	1	1
COG1974	SOS-response transcriptional repressors (RecA-mediated autopeptidases)	0.000432407	4.73342e-05	0.000781609	0.000137321	0.0365368	0.0101818	0.0141368	0.178379	0.50926
COG1975	Xanthine and CO dehydrogenases maturation factor, XdhC/CoxF family	0.00017073	3.68703e-05	0.000106542	1.02742e-05	0.132364	0.284492	0.210082	0.548947	1
COG1977	Molybdopterin converting factor, small subunit	9.9341e-06	6.57111e-06	9.43729e-05	7.36052e-05	0.315797	0.101735	0.0636821	2.57498e-05	1
COG1979	Uncharacterized oxidoreductases, Fe-dependent alcohol dehydrogenase family	0.000555022	4.43798e-05	0.000713354	0.000145824	0.36022	0.19292	0.210291	0.487892	1
COG1981	Predicted membrane protein	0	0	0	0	1	NaN	0.999996	1	1
COG1982	Arginine/lysine/ornithine decarboxylases	0.000604249	7.99966e-05	0.000497081	0.000254825	0.750954	0.605862	0.63093	0.865731	1
COG1983	Putative stress-responsive transcriptional regulator	0.000266399	2.9504e-05	0.00156412	0.00134229	0.433171	0.152271	0.00979546	0.000118946	1
COG1985	Pyrimidine reductase, riboflavin biosynthesis	0.000275109	2.15595e-05	0.000247545	5.25319e-05	0.700443	0.567387	0.627725	0.994027	1
COG1987	Flagellar biosynthesis pathway, component FliQ	3.81247e-05	1.49038e-05	9.85238e-05	6.42287e-05	0.457782	0.219336	0.205199	0.0385361	1
COG1988	Predicted membrane-bound metal-dependent hydrolases	2.16991e-05	1.13758e-05	0.000112638	6.56885e-05	0.230695	0.0671853	0.0829959	0.000711921	1
COG1989	Type II secretory pathway, prepilin signal peptidase PulO and related peptidases	0.00010193	2.80959e-05	0.000163616	9.72999e-05	0.627805	0.427082	0.407446	0.244308	1
COG1990	Uncharacterized conserved protein	5.66547e-06	5.66547e-06	0	0	0.38111	0.528757	0.996793	0.0570745	1
COG1991	Uncharacterized conserved protein	0	0	0	0	1	NaN	0.999996	1	1
COG1992	Uncharacterized conserved protein	5.01051e-07	5.01051e-07	0	0	1	0.528757	0.998196	0	1
COG1993	Uncharacterized conserved protein	1.05891e-05	7.02607e-06	0	0	0.176154	0.348012	0.996685	0.015946	1
COG1994	Zn-dependent proteases	0.000173167	4.65535e-05	9.22333e-05	3.13058e-05	0.201579	0.298823	0.22374	0.320165	1
COG1996	DNA-directed RNA polymerase, subunit RPC10 (contains C4-type Zn-finger)	0	0	3.09964e-05	3.09964e-05	0.38111	0.13941	0.996632	1.90139e-07	1
COG1997	Ribosomal protein L37AE/L43A	0	0	0	0	1	NaN	0.999996	1	1
COG1998	Ribosomal protein S27AE	0	0	0	0	1	NaN	0.999996	1	1
COG1999	Uncharacterized protein SCO1/SenC/PrrC, involved in biogenesis of respiratory and photosynthetic systems	0	0	0	0	1	NaN	0.999996	1	1
COG2000	Predicted Fe-S protein	2.72119e-05	9.69164e-06	1.18635e-05	7.98145e-06	0.284254	0.349859	0.305087	0.244275	1
COG2001	Uncharacterized protein conserved in bacteria	0.00028371	4.02202e-05	0.000290183	6.13032e-05	0.944575	0.930773	0.978314	0.703504	1
COG2002	Regulators of stationary/sporulation gene expression	0.000477514	6.43066e-05	7.81922e-05	3.79855e-05	0.000478231	0.00236635	0.000456965	0.111221	0.036275
COG2003	DNA repair proteins	0.000632697	5.25904e-05	0.000343515	0.000186675	0.18278	0.0670884	0.123629	0.694023	1
COG2004	Ribosomal protein S24E	0	0	0	0	1	NaN	0.999996	1	1
COG2005	N-terminal domain of molybdenum-binding protein	8.25003e-05	1.81233e-05	0.000142995	5.63966e-05	0.368195	0.20636	0.232717	0.286164	1
COG2006	Uncharacterized conserved protein	6.71842e-05	2.15527e-05	5.12234e-05	4.07534e-05	0.783464	0.710246	0.727011	0.857318	1
COG2007	Ribosomal protein S8E	0	0	0	0	1	NaN	0.999996	1	1
COG2008	Threonine aldolase	0.000434747	4.17629e-05	0.000398133	9.10491e-05	0.772052	0.678348	0.661565	0.823219	1
COG2009	Succinate dehydrogenase/fumarate reductase, cytochrome b subunit	9.34291e-06	6.19132e-06	6.18266e-05	4.24169e-05	0.28363	0.0903749	0.103655	0.00560105	1
COG2010	Cytochrome c, mono- and diheme variants	1.69851e-05	7.5996e-06	7.91058e-05	5.85552e-05	0.354428	0.135515	0.0828921	0.0137964	1
COG2011	ABC-type metal ion transport system, permease component	0.00030638	5.73108e-05	0.00107617	0.000450155	0.127612	0.024649	0.00814563	0.0321012	1
COG2012	DNA-directed RNA polymerase, subunit H, RpoH/RPB5	0	0	0	0	1	NaN	0.999996	1	1
COG2014	Uncharacterized conserved protein	6.69132e-06	5.01903e-06	1.35055e-05	1.35055e-05	0.708068	0.564231	0.593067	0.25562	1
COG2015	Alkyl sulfatase and related hydrolases	8.85879e-05	1.56043e-05	0.000170895	0.000101338	0.516575	0.251351	0.166778	0.203092	1
COG2016	Predicted RNA-binding protein (contains PUA domain)	0	0	0	0	1	NaN	0.999996	1	1
COG2017	Galactose mutarotase and related enzymes	0.00122485	8.52791e-05	0.00164688	0.000650591	0.607561	0.346236	0.297649	0.459495	1
COG2018	Uncharacterized distant relative of homeotic protein bithoraxoid	0	0	0	0	1	NaN	0.999996	1	1
COG2019	Archaeal adenylate kinase	0	0	0	0	1	NaN	0.999996	1	1
COG2020	Putative protein-S-isoprenylcysteine methyltransferase	5.01051e-06	5.01051e-06	3.37637e-05	3.37637e-05	0.496024	0.228519	0.261514	0.00463126	1
COG2021	Homoserine acetyltransferase	1.93355e-05	1.15828e-05	5.28422e-05	3.55937e-05	0.467973	0.265637	0.33249	0.0892119	1
COG2022	Uncharacterized enzyme of thiazole biosynthesis	0.000331498	4.74874e-05	0.000564559	0.000200001	0.320177	0.136814	0.114146	0.264117	1
COG2023	RNase P subunit RPR2	0	0	0	0	1	NaN	0.999996	1	1
COG2024	Phenylalanyl-tRNA synthetase alpha subunit (archaeal type)	0	0	0	0	1	NaN	0.999996	1	1
COG2025	Electron transfer flavoprotein, alpha subunit	0.000601844	5.35245e-05	0.000340286	8.11591e-05	0.0223779	0.0205605	0.0190688	0.587553	0.379982
COG2026	Cytotoxic translational repressor of toxin-antitoxin stability system	4.22447e-05	1.23777e-05	6.47601e-05	3.74575e-05	0.650453	0.472239	0.450113	0.366262	1
COG2027	D-alanyl-D-alanine carboxypeptidase (penicillin-binding protein 4)	0.00021398	3.69021e-05	0.000270016	3.01353e-05	0.302331	0.368869	0.41992	0.523905	1
COG2028	Uncharacterized conserved protein	0	0	0	0	1	NaN	0.999996	1	1
COG2030	Acyl dehydratase	0.000155823	1.98261e-05	0.000170964	2.69566e-05	0.720354	0.672456	0.776586	0.666955	1
COG2031	Short chain fatty acids transporter	4.76514e-05	1.35772e-05	2.30811e-05	1.59266e-05	0.30306	0.311155	0.306209	0.445135	1
COG2034	Predicted membrane protein	0	0	0	0	1	NaN	0.999996	1	1
COG2036	Histones H3 and H4	0	0	0	0	1	NaN	0.999996	1	1
COG2038	NaMN:DMB phosphoribosyltransferase	0.00048458	2.83743e-05	0.000242593	0.00010437	0.0484068	0.0105715	0.0327976	0.426012	0.600621
COG2039	Pyrrolidone-carboxylate peptidase (N-terminal pyroglutamyl peptidase)	0.0001216	2.88625e-05	0.000270307	6.82166e-05	0.0709925	0.0345149	0.0711669	0.104818	0.770123
COG2040	Homocysteine/selenocysteine methylase (S-methylmethionine-dependent)	6.63027e-05	2.00307e-05	9.28231e-05	7.20928e-05	0.778243	0.637512	0.611079	0.410276	1
COG2041	Sulfite oxidase and related enzymes	1.76485e-05	1.17509e-05	0.000170369	9.99614e-05	0.170283	0.0392328	0.0570876	5.68963e-05	1
COG2043	Uncharacterized protein conserved in archaea	2.15243e-05	1.10391e-05	0	0	0.0799701	0.230894	0.996564	0.00290687	0.835982
COG2044	Predicted peroxiredoxins	0	0	0	0	1	NaN	0.999996	1	1
COG2045	Phosphosulfolactate phosphohydrolase and related enzymes	7.73025e-06	5.29252e-06	2.16975e-05	2.16975e-05	0.618458	0.397451	0.402777	0.059523	1
COG2047	Uncharacterized protein (ATP-grasp superfamily)	0	0	0	0	1	NaN	0.999996	1	1
COG2048	Heterodisulfide reductase, subunit B	4.33628e-05	1.29525e-05	2.88609e-05	1.7137e-05	0.588804	0.534803	0.559655	0.700257	1
COG2050	Uncharacterized protein, possibly involved in aromatic compounds catabolism	0.000402024	6.01166e-05	0.00038476	0.000167524	0.939172	0.904076	0.925717	0.873765	1
COG2051	Ribosomal protein S27E	0	0	0	0	1	NaN	0.999996	1	1
COG2054	Uncharacterized archaeal kinase related to aspartokinases, uridylate kinases	0	0	0	0	1	NaN	0.999996	1	1
COG2056	Predicted permease	1.97526e-05	1.02053e-05	1.68819e-05	1.68819e-05	0.908107	0.882224	0.897956	0.73856	1
COG2057	Acyl CoA:acetate/3-ketoacid CoA transferase, beta subunit	0.000108072	2.76469e-05	0.000145018	8.41207e-05	0.741469	0.596571	0.577551	0.440857	1
COG2058	Ribosomal protein L12E/L44/L45/RPP1/RPP2	0	0	0	0	1	NaN	0.999996	1	1
COG2059	Chromate transport protein ChrA	0.000818312	7.02788e-05	0.000185792	5.7812e-05	8.57517e-05	0.000172884	6.88388e-05	0.0291993	0.0216733
COG2061	ACT-domain-containing protein, predicted allosteric regulator of homoserine dehydrogenase	0	0	0	0	1	NaN	0.999996	1	1
COG2062	Phosphohistidine phosphatase SixA	5.6952e-05	1.65746e-05	0.000367614	0.000154049	0.0713454	0.00997969	0.00388623	0.000106582	0.773068
COG2063	Flagellar basal body L-ring protein	1.05145e-05	6.97268e-06	6.09687e-05	3.61953e-05	0.228759	0.0697773	0.121206	0.000888102	1
COG2064	Flp pilus assembly protein TadC	6.81894e-05	1.75764e-05	0.00046141	0.000235308	0.134442	0.0238712	0.0030508	6.89104e-05	1
COG2065	Pyrimidine operon attenuation protein/uracil phosphoribosyltransferase	9.66883e-05	2.01395e-05	7.74547e-05	2.94565e-05	0.669005	0.604407	0.665916	0.866564	1
COG2067	Long-chain fatty acid transport protein	0.000403994	8.13187e-05	0.00019729	9.91375e-05	0.146372	0.166891	0.138836	0.26434	1
COG2068	Uncharacterized MobA-related protein	0.000139648	3.01856e-05	0.000160806	4.51977e-05	0.758253	0.704703	0.680404	0.63299	1
COG2069	CO dehydrogenase/acetyl-CoA synthase delta subunit (corrinoid Fe-S protein)	1.87246e-05	8.18991e-06	0	0	0.0445975	0.165079	0.996587	0.00308503	0.579093
COG2070	Dioxygenases related to 2-nitropropane dioxygenase	0.000783679	3.60683e-05	0.000303429	0.000119033	0.00345975	0.000312491	0.00291058	0.129792	0.101987
COG2071	Predicted glutamine amidotransferases	0.00030866	4.69816e-05	0.000345116	6.4262e-05	0.717254	0.667981	0.719839	0.661326	1
COG2072	Predicted flavoprotein involved in K+ transport	2.20966e-06	2.20966e-06	3.40961e-05	3.40961e-05	0.449896	0.169158	0.102274	1.14425e-05	1
COG2073	Cobalamin biosynthesis protein CbiG	0.000237445	3.27845e-05	0.000103792	4.5157e-05	0.0370414	0.0412032	0.0392629	0.18351	0.514029
COG2074	2-phosphoglycerate kinase	0	0	0	0	1	NaN	0.999996	1	1
COG2075	Ribosomal protein L24E	0	0	0	0	1	NaN	0.999996	1	1
COG2076	Membrane transporters of cations and cationic drugs	0.000115777	3.30124e-05	0.000418211	0.000267091	0.324336	0.112161	0.0518336	0.00267655	1
COG2077	Peroxiredoxin	0.00012743	3.11062e-05	0.000231583	6.00579e-05	0.164178	0.115206	0.181558	0.145612	1
COG2080	Aerobic-type carbon monoxide dehydrogenase, small subunit CoxS/CutS homologs	0.00036111	2.13937e-05	0.00032627	0.000151922	0.857543	0.736304	0.788279	0.946185	1
COG2081	Predicted flavoproteins	0.000733847	7.15975e-05	0.000237642	7.18043e-05	0.000768467	0.00155805	0.000742222	0.365091	0.0421009
COG2083	Uncharacterized protein conserved in archaea	0	0	0	0	1	NaN	0.999996	1	1
COG2084	3-hydroxyisobutyrate dehydrogenase and related beta-hydroxyacid dehydrogenases	0.000224431	3.18934e-05	0.000469963	0.000180771	0.239689	0.0724623	0.0412187	0.186216	1
COG2085	Predicted dinucleotide-binding enzymes	5.01051e-06	5.01051e-06	3.09964e-05	3.09964e-05	0.503547	0.240101	0.2817	0.0129051	1
COG2086	Electron transfer flavoprotein, beta subunit	0.000530224	3.61688e-05	0.000399284	2.36825e-05	0.0127605	0.0439288	0.0333353	0.949708	0.256072
COG2087	Adenosyl cobinamide kinase/adenosyl cobinamide phosphate guanylyltransferase	0.000354411	3.54245e-05	0.000127155	5.44338e-05	0.0060389	0.00467537	0.00678219	0.394025	0.152449
COG2088	Uncharacterized protein, involved in the regulation of septum location	0.000283724	4.54112e-05	5.08767e-05	3.23673e-05	0.0021273	0.00841941	0.00376449	0.128421	0.0773649
COG2089	Sialic acid synthase	0.000224379	4.2265e-05	7.1933e-05	4.04371e-05	0.0256595	0.0513873	0.0333995	0.334439	0.408656
COG2091	Phosphopantetheinyl transferase	0.000245746	4.08819e-05	0.000226892	0.000112264	0.900324	0.845368	0.882787	0.79588	1
COG2093	DNA-directed RNA polymerase, subunit E''	0	0	0	0	1	NaN	0.999996	1	1
COG2095	Multiple antibiotic transporter	0.000316197	5.69607e-05	0.000203738	8.7911e-05	0.345827	0.300492	0.293639	0.821616	1
COG2096	Uncharacterized conserved protein	0.000320772	5.71614e-05	0.000176897	7.80866e-05	0.184594	0.180545	0.166637	0.671541	1
COG2097	Ribosomal protein L31E	0	0	0	0	1	NaN	0.999996	1	1
COG2099	Precorrin-6x reductase	0.000299974	4.10323e-05	8.82529e-05	3.52206e-05	0.00318601	0.00896065	0.00370147	0.236591	0.0983897
COG2100	Predicted Fe-S oxidoreductase	2.50526e-06	2.50526e-06	0	0	0.592119	0.528757	0.996926	0.125022	1
COG2102	Predicted ATPases of PP-loop superfamily	2.16516e-05	9.05279e-06	1.39484e-05	1.39484e-05	0.714282	0.648576	0.670593	0.836588	1
COG2103	Predicted sugar phosphate isomerase	0.000233481	3.22922e-05	0.000271544	8.6159e-05	0.743629	0.61438	0.604029	0.594489	1
COG2104	Sulfur transfer protein involved in thiamine biosynthesis	0.000147603	2.27192e-05	0.000266629	2.22314e-05	0.00411938	0.00900616	0.0324954	0.237224	0.115342
COG2105	Uncharacterized conserved protein	1.43534e-05	7.19267e-06	0.000121206	5.08026e-05	0.0627307	0.00898093	0.018912	0.0010608	0.710545
COG2106	Uncharacterized conserved protein	0	0	0	0	1	NaN	0.999996	1	1
COG2107	Predicted periplasmic solute-binding protein	0	0	0	0	1	NaN	0.999996	1	1
COG2108	Uncharacterized conserved protein related to pyruvate formate-lyase activating enzyme	9.69968e-06	6.41669e-06	0	0	0.172631	0.346625	0.996698	0.0598744	1
COG2109	ATP:corrinoid adenosyltransferase	0.000217869	1.61849e-05	0.000260897	0.000100437	0.737827	0.538484	0.42275	0.571143	1
COG2111	Multisubunit Na+/H+ antiporter, MnhB subunit	3.57944e-05	1.50881e-05	1.68819e-05	1.68819e-05	0.499418	0.47386	0.444903	0.520611	1
COG2112	Predicted Ser/Thr protein kinase	8.83865e-07	8.83865e-07	0	0	1	0.528757	0.997082	1	1
COG2113	ABC-type proline/glycine betaine transport systems, periplasmic components	0.000110453	1.99661e-05	0.000137387	5.76809e-05	0.727465	0.581804	0.535492	0.516429	1
COG2114	Adenylate cyclase, family 3 (some proteins contain HAMP domain)	2.34955e-05	1.42127e-05	1.68819e-05	1.68819e-05	0.812332	0.790402	0.79156	0.784378	1
COG2115	Xylose isomerase	0.000244118	3.77539e-05	0.000303832	5.13454e-05	0.447898	0.387684	0.436499	0.527178	1
COG2116	Formate/nitrite family of transporters	0.000130986	3.77203e-05	0.000312962	0.000172182	0.362789	0.165954	0.144987	0.086711	1
COG2117	Predicted subunit of tRNA(5-methylaminomethyl-2-thiouridylate) methyltransferase, contains the PP-loop ATPase domain	0	0	0	0	1	NaN	0.999996	1	1
COG2118	DNA-binding protein	0	0	0	0	1	NaN	0.999996	1	1
COG2119	Predicted membrane protein	2.51833e-05	1.04545e-05	4.10711e-05	4.10711e-05	0.766643	0.611349	0.584504	0.325947	1
COG2120	Uncharacterized proteins, LmbE homologs	0.000154555	2.30836e-05	8.9917e-05	5.70346e-05	0.355019	0.226098	0.278925	0.57028	1
COG2121	Uncharacterized protein conserved in bacteria	1.35169e-05	9.11049e-06	0	0	0.186164	0.355263	0.99665	0.0118134	1
COG2123	RNase PH-related exoribonuclease	0	0	0	0	1	NaN	0.999996	1	1
COG2124	Cytochrome P450	0	0	0.00014626	9.65272e-05	0.17087	0.0343616	0.996413	0	1
COG2125	Ribosomal protein S6E (S10)	0	0	0	0	1	NaN	0.999996	1	1
COG2128	Uncharacterized conserved protein	3.12092e-05	1.77869e-05	0.000289124	0.0001923	0.240853	0.0612653	0.0401271	4.08164e-05	1
COG2129	Predicted phosphoesterases, related to the Icc protein	0.00012516	2.39156e-05	1.51937e-05	1.51937e-05	0.00334761	0.0145742	0.0104027	0.0102266	0.100238
COG2130	Putative NADP-dependent oxidoreductases	9.09885e-06	6.02149e-06	8.75658e-05	5.07497e-05	0.165379	0.0374458	0.0506277	0.000113584	1
COG2131	Deoxycytidylate deaminase	0.000393654	5.30026e-05	0.000103792	4.5157e-05	0.00216028	0.00636687	0.00253338	0.0691521	0.0782645
COG2132	Putative multicopper oxidases	2.29167e-05	1.89167e-05	0.000289692	0.000142852	0.0967906	0.0163652	0.0747544	3.77843e-06	0.95801
COG2133	Glucose/sorbosone dehydrogenases	1.73421e-05	7.27701e-06	0.000106273	6.57032e-05	0.237196	0.0615622	0.0295557	0.000963367	1
COG2135	Uncharacterized conserved protein	2.56766e-05	1.37325e-05	0.000204131	6.06271e-05	0.0164511	0.001757	0.0285149	0.00011163	0.309717
COG2136	Predicted exosome subunit/U3 small nucleolar ribonucleoprotein (snoRNP) component, contains IMP4 domain	0	0	0	0	1	NaN	0.999996	1	1
COG2137	Uncharacterized protein conserved in bacteria	0.00031829	3.82709e-05	0.000401526	0.00013434	0.635562	0.435366	0.458603	0.51093	1
COG2138	Uncharacterized conserved protein	4.23408e-05	1.56325e-05	7.11811e-05	4.78887e-05	0.649513	0.469337	0.463158	0.246184	1
COG2140	Thermophilic glucose-6-phosphate isomerase and related metalloenzymes	6.14901e-05	1.81811e-05	5.82385e-05	2.60333e-05	0.936296	0.921812	0.982994	0.812597	1
COG2141	Coenzyme F420-dependent N5,N10-methylene tetrahydromethanopterin reductase and related flavin-dependent oxidoreductases	4.44154e-05	3.03405e-05	0.000701099	0.000505157	0.254574	0.0650751	0.0332548	5.05398e-08	1
COG2142	Succinate dehydrogenase, hydrophobic anchor subunit	0	0	7.88747e-05	5.85697e-05	0.23647	0.055066	0.996494	0	1
COG2143	Thioredoxin-related protein	0	0	0	0	1	NaN	0.999996	1	1
COG2144	Selenophosphate synthetase-related proteins	4.43123e-06	4.43123e-06	0	0	0.38111	0.528757	0.996831	0.0589791	1
COG2145	Hydroxyethylthiazole kinase, sugar kinase family	0.00028232	3.70544e-05	0.00045339	0.000144918	0.315487	0.139256	0.136198	0.2547	1
COG2146	Ferredoxin subunits of nitrite reductase and ring-hydroxylating dioxygenases	2.19625e-05	1.27113e-05	0.000185937	9.86524e-05	0.138479	0.0282018	0.0417787	2.07004e-05	1
COG2148	Sugar transferases involved in lipopolysaccharide synthesis	0.00143333	6.5055e-05	0.00118742	0.000389414	0.620107	0.371747	0.40972	0.886353	1
COG2149	Predicted membrane protein	1.45041e-05	9.88435e-06	9.73342e-05	7.83958e-05	0.355926	0.136044	0.123404	0.00026816	1
COG2150	Predicted regulator of amino acid metabolism, contains ACT domain	0	0	0	0	1	NaN	0.999996	1	1
COG2152	Predicted glycosylase	0.000518375	6.37912e-05	4.5581e-05	4.5581e-05	0.000237466	0.00073086	0.00301446	0.000286787	0.0313058
COG2153	Predicted acyltransferase	4.935e-05	1.45358e-05	9.90653e-05	1.83079e-05	0.0583309	0.0734672	0.147396	0.114031	0.676037
COG2155	Uncharacterized conserved protein	0.000148794	3.60519e-05	3.39948e-05	1.96278e-05	0.0187532	0.0681983	0.0198692	0.0240286	0.339057
COG2156	K+-transporting ATPase, c chain	0.000199472	2.3692e-05	0.000138738	2.65718e-05	0.125851	0.157705	0.154473	0.602752	1
COG2157	Ribosomal protein L20A (L18A)	0	0	0	0	1	NaN	0.999996	1	1
COG2159	Predicted metal-dependent hydrolase of the TIM-barrel fold	0.000456268	6.19156e-05	0.000233163	4.75531e-05	0.0167744	0.0469942	0.0237327	0.267713	0.312812
COG2160	L-arabinose isomerase	0.000329701	3.53615e-05	0.000518489	0.000101834	0.115376	0.0458975	0.0574526	0.250941	1
COG2161	Antitoxin of toxin-antitoxin stability system	0.000112368	1.46016e-05	0.000117179	3.29851e-05	0.916461	0.87767	0.898955	0.765207	1
COG2162	Arylamine N-acetyltransferase	4.16684e-05	2.27969e-05	7.38057e-05	3.8065e-05	0.560348	0.464577	0.532369	0.179201	1
COG2163	Ribosomal protein L14E/L6E/L27E	1.8293e-05	9.46957e-06	0	0	0.083565	0.234961	0.996598	0.00184426	0.860299
COG2165	Type II secretory pathway, pseudopilin PulG	4.48209e-05	2.11831e-05	0.000288819	0.000181007	0.239251	0.0633643	0.0436042	2.418e-05	1
COG2166	SufE protein probably involved in Fe-S center assembly	0.000203816	2.5917e-05	0.000138985	8.59431e-05	0.56169	0.354458	0.420504	0.9229	1
COG2167	Ribosomal protein L39E	0	0	0	0	1	NaN	0.999996	1	1
COG2168	Uncharacterized conserved protein involved in oxidation of intracellular sulfur	4.41933e-06	4.41933e-06	4.78783e-05	2.99487e-05	0.203789	0.0523816	0.143149	0.00168627	1
COG2169	Adenosine deaminase	9.2594e-05	3.65681e-05	0.000108912	4.57271e-05	0.825406	0.800785	0.796537	0.566576	1
COG2170	Uncharacterized conserved protein	0	0	9.98247e-05	5.80662e-05	0.123281	0.0192642	0.994408	3.67482e-08	1
COG2171	Tetrahydrodipicolinate N-succinyltransferase	0.000126773	2.95462e-05	0.000457577	0.000229201	0.206972	0.0507193	0.021313	0.0353676	1
COG2172	Anti-sigma regulatory factor (Ser/Thr protein kinase)	0.000414895	5.19208e-05	0.000165468	9.21591e-05	0.0397195	0.0279615	0.0422022	0.444385	0.540912
COG2173	D-alanyl-D-alanine dipeptidase	0.000101448	2.06342e-05	2.63469e-05	2.63469e-05	0.0478857	0.0596738	0.0820793	0.247926	0.596495
COG2175	Probable taurine catabolism dioxygenase	2.26619e-06	2.26619e-06	0.000108847	6.59344e-05	0.145643	0.0262198	0.0210273	8.54431e-07	1
COG2176	DNA polymerase III, alpha subunit (gram-positive type)	0.00075892	6.26187e-05	0.00112568	0.000630044	0.645483	0.386818	0.323255	0.381699	1
COG2177	Cell division protein	0.000499324	3.97407e-05	0.000453096	0.000117812	0.768302	0.639292	0.56761	0.847115	1
COG2179	Predicted hydrolase of the HAD superfamily	0.000182966	3.23096e-05	4.32938e-05	1.61548e-05	0.00342017	0.0187221	0.00326053	0.178463	0.10145
COG2180	Nitrate reductase delta subunit	2.05676e-05	9.87388e-06	0.000256459	0.00015159	0.161157	0.0323417	0.00934409	8.94137e-05	1
COG2181	Nitrate reductase gamma subunit	6.19209e-05	1.66183e-05	0.000186864	0.000115883	0.348205	0.133362	0.071941	0.0544356	1
COG2182	Maltose-binding periplasmic proteins/domains	0.000203228	2.4636e-05	0.000364763	0.000116636	0.233601	0.0758408	0.057728	0.246352	1
COG2183	Transcriptional accessory protein	0.000561717	4.08187e-05	0.00032223	6.28855e-05	0.00973282	0.00800957	0.00781163	0.66517	0.214845
COG2184	Protein involved in cell division	0.000244998	2.78173e-05	0.000548522	0.000160144	0.094251	0.0179468	0.00925492	0.129488	0.942704
COG2185	Methylmalonyl-CoA mutase, C-terminal domain/subunit (cobalamin-binding)	0.00045205	8.37767e-05	0.000159216	7.04741e-05	0.0230507	0.0546188	0.0260708	0.282877	0.385116
COG2186	Transcriptional regulators	0.000377779	4.93041e-05	0.000992007	0.000296819	0.0670479	0.0109705	0.00463838	0.0763647	0.740018
COG2187	Uncharacterized protein conserved in bacteria	0	0	0	0	1	NaN	0.999996	1	1
COG2188	Transcriptional regulators	0.000598291	6.90748e-05	0.00134403	0.000352104	0.063166	0.0112169	0.00622879	0.118635	0.712924
COG2189	Adenine specific DNA methylase Mod	0.000272116	3.61535e-05	0.000152542	6.39284e-05	0.142945	0.108951	0.0947931	0.58797	1
COG2191	Formylmethanofuran dehydrogenase subunit E	4.91479e-05	1.62076e-05	1.68819e-05	1.68819e-05	0.225586	0.258478	0.226185	0.273057	1
COG2192	Predicted carbamoyl transferase, NodU family	2.98904e-05	1.4499e-05	0	0	0.0648811	0.206978	0.99651	0.00305709	0.723675
COG2193	Bacterioferritin (cytochrome b1)	2.35568e-05	1.00644e-05	8.02583e-05	4.74888e-05	0.305428	0.119448	0.121663	0.027821	1
COG2194	Predicted membrane-associated, metal-dependent hydrolase	0.000332531	5.89186e-05	0.000517196	0.0003123	0.644477	0.410682	0.357289	0.323503	1
COG2195	Di- and tripeptidases	0.00143834	0.000101958	0.000580046	0.000113878	0.000369392	0.000414105	0.000202442	0.300243	0.034918
COG2197	Response regulator containing a CheY-like receiver domain and an HTH DNA-binding domain	0.00149508	8.69313e-05	0.00295625	0.000675625	0.056517	0.00725133	0.00202595	0.167683	0.663497
COG2198	FOG: HPt domain	1.10654e-05	4.96539e-06	0.000131882	6.55165e-05	0.0988717	0.0147396	0.00495609	3.988e-05	0.974892
COG2201	Chemotaxis response regulator containing a CheY-like receiver domain and a methylesterase domain	6.33097e-05	1.91072e-05	0.00011775	5.8401e-05	0.472373	0.271012	0.279264	0.201327	1
COG2202	FOG: PAS/PAC domain	0.000355093	3.61131e-05	0.000340434	8.21925e-05	0.896834	0.85016	0.891153	0.840255	1
COG2203	FOG: GAF domain	0.000122066	3.58778e-05	0.000137367	5.6152e-05	0.855967	0.819464	0.807669	0.636187	1
COG2204	Response regulator containing CheY-like receiver, AAA-type ATPase, and DNA-binding domains	0.00194622	0.000189196	0.000471475	0.000233518	0.000765169	0.000860972	0.00168457	0.067194	0.0421009
COG2205	Osmosensitive K+ channel histidine kinase	0.000818289	8.75903e-05	0.000315662	8.64083e-05	0.00244063	0.00531203	0.00232113	0.228923	0.0830333
COG2206	HD-GYP domain	0.000402557	7.02895e-05	0.000262358	0.000104318	0.32803	0.290842	0.284026	0.667413	1
COG2208	Serine phosphatase RsbU, regulator of sigma subunit	0.00032631	5.22559e-05	0.0001408	5.49166e-05	0.0338719	0.0573664	0.03752	0.306637	0.4864
COG2209	Na+-transporting NADH:ubiquinone oxidoreductase, subunit NqrE	0.000158002	1.96107e-05	3.40961e-05	3.40961e-05	0.0105705	0.00646276	0.0368605	0.0519653	0.228554
COG2210	Uncharacterized conserved protein	8.67135e-05	1.64904e-05	1.35055e-05	1.35055e-05	0.00671832	0.0192805	0.0204904	0.0268043	0.16478
COG2211	Na+/melibiose symporter and related transporters	0.00152246	0.000189703	0.00236538	0.00033938	0.0544391	0.0395931	0.0615796	0.306222	0.645111
COG2212	Multisubunit Na+/H+ antiporter, MnhF subunit	4.92359e-06	4.92359e-06	2.19464e-05	2.19464e-05	0.541664	0.301954	0.37474	0.0195291	1
COG2213	Phosphotransferase system, mannitol-specific IIBC component	4.76861e-05	1.97086e-05	0.000314063	0.00010493	0.0311015	0.00366132	0.0153839	0.000249574	0.463444
COG2214	DnaJ-class molecular chaperone	0.000396891	3.15601e-05	0.000431792	7.37714e-05	0.730901	0.613112	0.724023	0.701136	1
COG2215	ABC-type uncharacterized transport system, permease component	8.9395e-06	7.8924e-06	0.00018393	0.000125816	0.222084	0.050944	0.0509201	1.85868e-07	1
COG2216	High-affinity K+ transport system, ATPase chain B	0.000337003	3.92101e-05	0.00017449	8.74009e-05	0.127592	0.0715506	0.101062	0.391759	1
COG2217	Cation transport ATPase	0.00213146	0.000149846	0.0017211	0.000366273	0.361025	0.233443	0.225655	0.872466	1
COG2218	Formylmethanofuran dehydrogenase subunit C	0	0	0	0	1	NaN	0.999996	1	1
COG2219	Eukaryotic-type DNA primase, large subunit	0	0	0	0	1	NaN	0.999996	1	1
COG2220	Predicted Zn-dependent hydrolases of the beta-lactamase fold	0.000516094	5.40623e-05	0.000445322	0.000176417	0.761623	0.619341	0.645327	0.941986	1
COG2221	Dissimilatory sulfite reductase (desulfoviridin), alpha and beta subunits	0.000137776	3.77783e-05	9.72204e-05	6.93831e-05	0.684358	0.587581	0.595532	0.691783	1
COG2222	Predicted phosphosugar isomerases	0.000259974	4.3816e-05	0.000406537	4.5124e-05	0.0413719	0.0701215	0.121499	0.283798	0.551853
COG2223	Nitrate/nitrite transporter	4.70039e-05	1.82539e-05	0.000215895	0.000145099	0.310682	0.10401	0.0586456	0.00174952	1
COG2224	Isocitrate lyase	7.84248e-06	5.21949e-06	0.000100544	6.28922e-05	0.192067	0.0419318	0.0319408	4.45301e-06	1
COG2225	Malate synthase	2.28649e-05	1.51347e-05	0.000134723	7.85987e-05	0.218934	0.0648884	0.123649	0.000327145	1
COG2226	Methylase involved in ubiquinone/menaquinone biosynthesis	0.000291683	4.58391e-05	0.000156081	4.00763e-05	0.0493501	0.0973157	0.0634994	0.344517	0.60914
COG2227	2-polyprenyl-3-methyl-5-hydroxy-6-metoxy-1,4-benzoquinol methylase	9.07439e-05	1.92935e-05	9.11071e-05	5.60134e-05	0.995874	0.993841	0.954458	0.831236	1
COG2229	Predicted GTPase	0	0	1.54982e-05	1.54982e-05	0.38111	0.13941	0.99673	0	1
COG2230	Cyclopropane fatty acid synthase and related methyltransferases	0.000122688	1.53001e-05	0.000645668	0.000390842	0.239904	0.0573533	0.0024472	0.000209536	1
COG2231	Uncharacterized protein related to Endonuclease III	1.8744e-05	7.69004e-06	8.16695e-05	3.64948e-05	0.130082	0.0327562	0.0525442	0.00279431	1
COG2232	Predicted ATP-dependent carboligase related to biotin carboxylase	0	0	0	0	1	NaN	0.999996	1	1
COG2233	Xanthine/uracil permeases	0.000885292	8.32746e-05	0.00131134	0.000271049	0.178456	0.0706818	0.0707827	0.309868	1
COG2234	Predicted aminopeptidases	0.00043723	5.36025e-05	9.58215e-05	3.92842e-05	0.000610156	0.00219985	0.000609217	0.0115095	0.0382627
COG2235	Arginine deiminase	0.000104698	2.73305e-05	0.000181802	8.10377e-05	0.464847	0.267232	0.301697	0.18451	1
COG2236	Predicted phosphoribosyltransferases	0	0	2.20157e-05	1.5924e-05	0.223947	0.0498456	0.99668	4.74491e-06	1
COG2237	Predicted membrane protein	0	0	0	0	1	NaN	0.999996	1	1
COG2238	Ribosomal protein S19E (S16A)	0	0	0	0	1	NaN	0.999996	1	1
COG2239	Mg/Co/Ni transporter MgtE (contains CBS domain)	0.000603515	4.77656e-05	0.00018385	6.1718e-05	0.000451845	0.000369385	0.000448591	0.0352296	0.0351549
COG2240	Pyridoxal/pyridoxine/pyridoxamine kinase	0.00052614	5.67487e-05	0.000488281	0.00011255	0.811996	0.742282	0.727751	0.94531	1
COG2241	Precorrin-6B methylase 1	0.000231827	1.68724e-05	7.73389e-05	3.13298e-05	0.00174472	0.000603492	0.00170432	0.061304	0.0675149
COG2242	Precorrin-6B methylase 2	0.0002299	1.91466e-05	0.000123226	5.11883e-05	0.0795941	0.0323535	0.0582265	0.68747	0.833889
COG2243	Precorrin-2 methylase	0.000209295	1.286e-05	0.000135116	5.12274e-05	0.216279	0.0751386	0.135405	0.84124	1
COG2244	Membrane protein involved in the export of O-antigen and teichoic acid	0.00194022	9.089e-05	0.000897277	0.000121109	9.89443e-05	4.09958e-05	2.94353e-05	0.568633	0.0229067
COG2245	Predicted membrane protein	0	0	0	0	1	NaN	0.999996	1	1
COG2246	Predicted membrane protein	0.000360762	2.34983e-05	0.00022801	0.00010131	0.263505	0.0968227	0.135097	0.7986	1
COG2247	Putative cell wall-binding domain	0.000253759	5.1075e-05	0.000108475	5.20896e-05	0.0735453	0.115654	0.0707171	0.477006	0.789693
COG2248	Predicted hydrolase (metallo-beta-lactamase superfamily)	0	0	0	0	1	NaN	0.999996	1	1
COG2249	Putative NADPH-quinone reductase (modulator of drug activity B)	0.000114803	2.24774e-05	0.000867947	0.000220833	0.00715037	0.000263362	8.01184e-05	0.00155167	0.1727
COG2250	Uncharacterized conserved protein related to C-terminal domain of eukaryotic chaperone, SACSIN	1.55665e-05	7.80721e-06	0	0	0.0729318	0.221211	0.99662	0.0264278	0.785772
COG2251	Predicted nuclease (RecB family)	0	0	3.37637e-06	3.37637e-06	0.046975	0.13941	0.99696	0	0.590575
COG2252	Permeases	0.000494233	9.00632e-05	0.000800888	0.000132607	0.0865465	0.0842125	0.13674	0.31472	0.879613
COG2253	Uncharacterized conserved protein	0.000176977	2.58616e-05	0.000180354	7.72597e-05	0.973849	0.958016	0.945864	0.723133	1
COG2254	Predicted HD superfamily hydrolase, possibly a nuclease	0	0	0	0	1	NaN	0.999996	1	1
COG2255	Holliday junction resolvasome, helicase subunit	0.000646273	6.17431e-05	0.000382159	5.2826e-05	0.00886211	0.0235441	0.013019	0.683981	0.199556
COG2256	ATPase related to the helicase subunit of the Holliday junction resolvase	0.000709427	6.99378e-05	0.000518896	0.00011028	0.196071	0.164337	0.15296	0.903445	1
COG2257	Uncharacterized homolog of the cytoplasmic domain of flagellar protein FhlB	3.56561e-05	9.40302e-06	3.74446e-05	2.22505e-05	0.953546	0.930696	0.844454	0.721518	1
COG2259	Predicted membrane protein	0.000154689	2.03771e-05	0.00021293	0.000116825	0.697531	0.480406	0.406554	0.429362	1
COG2261	Predicted membrane protein	0	0	0.000192881	6.7341e-05	0.0166325	0.000812005	0.99426	0	0.311391
COG2262	GTPases	0.000635179	3.95656e-05	0.000555503	0.000134793	0.652402	0.460572	0.397477	0.920474	1
COG2263	Predicted RNA methylase	8.28346e-06	5.56101e-06	1.68819e-05	1.68819e-05	0.701601	0.540588	0.556751	0.277184	1
COG2264	Ribosomal protein L11 methylase	0.000435546	3.23862e-05	0.000189758	3.42302e-05	0.000560684	0.000854377	0.000588699	0.372983	0.0382627
COG2265	SAM-dependent methyltransferases related to tRNA (uracil-5-)-methyltransferase	0.00108606	7.59312e-05	0.000796738	0.000102184	0.0457452	0.0525813	0.0493842	0.85761	0.585722
COG2266	GTP:adenosylcobinamide-phosphate guanylyltransferase	0	0	0	0	1	NaN	0.999996	1	1
COG2267	Lysophospholipase	0.00047542	6.08273e-05	0.00116725	0.000729313	0.443524	0.166728	0.0647773	0.086615	1
COG2268	Uncharacterized protein conserved in bacteria	0.000157303	2.46612e-05	0.000357141	0.000185804	0.348887	0.131453	0.0744539	0.10995	1
COG2269	Truncated, possibly inactive, lysyl-tRNA synthetase (class II)	1.11106e-05	7.40984e-06	5.40775e-05	3.53539e-05	0.297097	0.112921	0.167709	0.0119757	1
COG2270	Permeases of the major facilitator superfamily	0.000236962	3.4058e-05	0.000151213	5.70305e-05	0.257433	0.203536	0.175728	0.672263	1
COG2271	Sugar phosphate permease	0.000172055	3.21324e-05	0.000524862	0.000343209	0.367116	0.138713	0.0464273	0.0353096	1
COG2272	Carboxylesterase type B	0.000163186	3.26453e-05	0.000118877	5.65926e-05	0.587168	0.486178	0.487327	0.804466	1
COG2273	Beta-glucanase/Beta-glucan synthetase	0.000310852	4.71428e-05	3.64483e-05	2.71188e-05	0.000672821	0.00358964	0.00155615	0.0111389	0.0399149
COG2274	ABC-type bacteriocin/lantibiotic exporters, contain an N-terminal double-glycine peptidase domain	0.000504873	5.22902e-05	0.000431733	7.14394e-05	0.504401	0.443677	0.462219	0.994373	1
COG2301	Citrate lyase beta subunit	0.000155763	2.7644e-05	0.000324197	7.84969e-05	0.0692313	0.025199	0.0376202	0.134936	0.757146
COG2302	Uncharacterized conserved protein, contains S4-like domain	0.00021591	3.60246e-05	0.000101608	6.49287e-05	0.164274	0.124659	0.128538	0.349057	1
COG2303	Choline dehydrogenase and related flavoproteins	1.46052e-05	1.09222e-05	0.000189692	0.000134452	0.254458	0.0666884	0.0571158	8.42091e-06	1
COG2304	Uncharacterized protein containing a von Willebrand factor type A (vWA) domain	0.000159841	1.78252e-05	0.000473152	0.000442597	0.570259	0.285592	0.102439	0.0311191	1
COG2306	Uncharacterized conserved protein	4.41933e-06	4.41933e-06	0	0	0.38111	0.528757	0.996828	0.0645811	1
COG2307	Uncharacterized protein conserved in bacteria	3.22078e-05	1.14294e-05	0.000159871	5.13076e-05	0.0349075	0.00514857	0.0164768	0.00249777	0.494538
COG2308	Uncharacterized conserved protein	3.22078e-05	1.14294e-05	0.000149023	5.44506e-05	0.0611278	0.0112505	0.0231053	0.00360995	0.698548
COG2309	Leucyl aminopeptidase (aminopeptidase T)	0.00027934	6.39076e-05	4.06089e-05	3.21367e-05	0.00777702	0.0364923	0.00924985	0.0125623	0.182798
COG2310	Uncharacterized proteins involved in stress response, homologs of TerZ and putative cAMP-binding protein CABP1	6.81355e-05	2.15945e-05	4.79163e-05	4.79163e-05	0.760987	0.660498	0.682445	0.780581	1
COG2311	Predicted membrane protein	0.000154539	4.39673e-05	9.43729e-05	7.36052e-05	0.573184	0.477801	0.484368	0.562588	1
COG2314	Predicted membrane protein	3.97528e-05	1.56738e-05	1.68819e-05	1.68819e-05	0.42115	0.403497	0.366265	0.32004	1
COG2315	Uncharacterized protein conserved in bacteria	0.000406749	5.90594e-05	0.000305095	6.58655e-05	0.313225	0.330132	0.327551	0.785836	1
COG2316	Predicted hydrolase (HD superfamily)	0.000109118	1.92734e-05	3.91328e-05	2.35498e-05	0.0434134	0.0582218	0.0561567	0.177822	0.569169
COG2317	Zn-dependent carboxypeptidase	0.00013355	1.20073e-05	0.00017443	4.32068e-05	0.460012	0.238595	0.202443	0.467593	1
COG2318	Uncharacterized protein conserved in bacteria	0	0	2.63469e-05	2.63469e-05	0.38111	0.13941	0.996656	0	1
COG2319	FOG: WD40 repeat	1.99012e-05	9.88594e-06	0	0	0.0704153	0.21709	0.996578	0.00170677	0.76737
COG2322	Predicted membrane protein	0	0	0	0	1	NaN	0.999996	1	1
COG2324	Predicted membrane protein	0	0	0	0	1	NaN	0.999996	1	1
COG2327	Uncharacterized conserved protein	0.000167526	2.60582e-05	5.89759e-05	3.73099e-05	0.037612	0.0392259	0.0479772	0.127664	0.518159
COG2329	Uncharacterized enzyme involved in biosynthesis of extracellular polysaccharides	3.98548e-05	2.38562e-05	8.13815e-05	5.19372e-05	0.559114	0.415427	0.486416	0.124877	1
COG2331	Uncharacterized protein conserved in bacteria	6.57004e-05	2.69843e-05	0.000173459	0.000115626	0.461875	0.223817	0.231167	0.0398287	1
COG2332	Cytochrome c-type biogenesis protein CcmE	2.3847e-05	1.37856e-05	6.94096e-05	4.01031e-05	0.345487	0.193597	0.282034	0.0280945	1
COG2333	Predicted hydrolase (metallo-beta-lactamase superfamily)	0.000422754	6.29058e-05	0.000220854	8.45543e-05	0.086065	0.0944266	0.0810552	0.320536	0.878143
COG2334	Putative homoserine kinase type II (protein kinase fold)	3.64486e-05	1.22307e-05	0.000171848	7.57848e-05	0.11281	0.0226987	0.0212809	0.00106345	1
COG2336	Growth regulator	3.33631e-05	8.81649e-06	0	0	0.003905	0.0316008	0.9945	0.000426498	0.110645
COG2337	Growth inhibitor	0.000661199	5.26969e-05	0.000172902	9.01402e-05	0.00104881	0.000441553	0.00239814	0.0243272	0.0512131
COG2339	Predicted membrane protein	4.21521e-05	1.19545e-05	2.56695e-05	2.56695e-05	0.643949	0.513988	0.555737	0.53929	1
COG2340	Uncharacterized protein with SCP/PR1 domains	6.78707e-05	1.55882e-05	0.000132946	7.08462e-05	0.467043	0.224085	0.198265	0.125786	1
COG2342	Predicted extracellular endo alpha-1,4 polygalactosaminidase or related polysaccharide hydrolase	0	0	0	0	1	NaN	0.999996	1	1
COG2344	AT-rich DNA-binding protein	0.000424441	4.18525e-05	6.09807e-05	4.16341e-05	0.000220976	0.000279602	0.00114781	0.00114057	0.0313058
COG2345	Predicted transcriptional regulator	4.43123e-06	4.43123e-06	6.65334e-05	2.77391e-05	0.0507683	0.0068104	0.0950446	2.83033e-06	0.617298
COG2348	Uncharacterized protein involved in methicillin resistance	0.000121627	3.58058e-05	0.000293097	0.000150302	0.329874	0.144736	0.141892	0.0369898	1
COG2352	Phosphoenolpyruvate carboxylase	0.000129066	3.12889e-05	0.000487264	0.000129471	0.0224768	0.00297831	0.00725641	0.00195672	0.38098
COG2354	Uncharacterized protein conserved in bacteria	1.24988e-05	9.8727e-06	9.03874e-05	5.22284e-05	0.193904	0.0540681	0.137904	0.00413494	1
COG2355	Zn-dependent dipeptidase, microsomal dipeptidase homolog	0.000271009	5.33027e-05	6.63023e-05	2.77347e-05	0.00698876	0.0326209	0.00513003	0.23727	0.170532
COG2356	Endonuclease I	1.65355e-05	8.27851e-06	9.59227e-05	7.51191e-05	0.355048	0.132317	0.0741274	0.0103761	1
COG2357	Uncharacterized protein conserved in bacteria	0.000314141	5.06926e-05	0.000219052	7.93532e-05	0.37331	0.32598	0.291661	0.946598	1
COG2358	TRAP-type uncharacterized transport system, periplasmic component	0.000190695	2.66398e-05	8.16378e-05	3.10335e-05	0.0233706	0.0349428	0.0236273	0.500907	0.387143
COG2361	Uncharacterized conserved protein	0.000126628	2.1933e-05	3.39222e-05	3.39222e-05	0.0438422	0.0402456	0.0720173	0.234062	0.571632
COG2362	D-aminopeptidase	3.03653e-05	1.3813e-05	3.22835e-05	1.8678e-05	0.948025	0.93839	0.920656	0.606722	1
COG2363	Uncharacterized small membrane protein	0	0	8.78413e-05	5.18905e-05	0.128482	0.0207644	0.99444	0	1
COG2364	Predicted membrane protein	0.000260024	5.4901e-05	0.000230413	4.31047e-05	0.737135	0.74461	0.749276	0.845078	1
COG2365	Protein tyrosine/serine phosphatase	0.000249883	2.7961e-05	4.01292e-05	2.37444e-05	0.000316622	0.000752286	0.000797247	0.0874912	0.0345443
COG2367	Beta-lactamase class A	0.000334516	5.99058e-05	0.00023786	2.16144e-05	0.170201	0.321428	0.262103	0.917058	1
COG2368	Aromatic ring hydroxylase	6.77244e-05	1.4129e-05	7.45971e-05	5.11919e-05	0.918925	0.862569	0.855815	0.625374	1
COG2369	Uncharacterized protein, homolog of phage Mu protein gp30	4.56232e-05	1.53977e-05	4.01292e-05	2.37444e-05	0.878107	0.847874	0.888053	0.897013	1
COG2370	Hydrogenase/urease accessory protein	0	0	0	0	1	NaN	0.999996	1	1
COG2371	Urease accessory protein UreE	1.4119e-05	7.07021e-06	7.77121e-05	4.4949e-05	0.218904	0.0592514	0.0610056	0.00785053	1
COG2372	Uncharacterized protein, homolog of Cu resistance protein CopC	0	0	9.57565e-05	5.98974e-05	0.149574	0.0271348	0.994419	0	1
COG2373	Large extracellular alpha-helical protein	0.000465325	6.49582e-05	0.000156864	9.50445e-05	0.0229122	0.0225197	0.0305055	0.267347	0.384923
COG2374	Predicted extracellular nuclease	0.000184602	3.03569e-05	1.1956e-05	9.8347e-06	0.000441951	0.0037072	0.000612358	0.00902103	0.0351549
COG2375	Siderophore-interacting protein	4.41933e-06	4.41933e-06	0.000127368	5.72755e-05	0.0570645	0.00635686	0.0434717	2.60717e-06	0.666191
COG2376	Dihydroxyacetone kinase	0.000187234	3.74447e-05	0.000919311	0.00010634	0.000158311	4.56468e-06	0.000327457	0.00648845	0.0278274
COG2377	Predicted molecular chaperone distantly related to HSP70-fold metalloproteases	3.11155e-05	1.2355e-05	0.000147518	5.42168e-05	0.0616258	0.0123669	0.0331043	0.00885456	0.701378
COG2378	Predicted transcriptional regulator	0.000669074	6.45303e-05	0.000765553	0.000105302	0.528425	0.435483	0.48003	0.620669	1
COG2379	Putative glycerate kinase	0.000180988	3.96927e-05	0	0	0.00127638	0.0128404	0.996205	3.36035e-05	0.0566138
COG2382	Enterochelin esterase and related enzymes	0.000330495	6.4356e-05	0.000202805	0.000140344	0.503966	0.355803	0.383991	0.68918	1
COG2383	Uncharacterized conserved protein	0	0	0	0	1	NaN	0.999996	1	1
COG2384	Predicted SAM-dependent methyltransferase	0.000224501	3.18516e-05	0.000151332	4.36517e-05	0.23395	0.218874	0.165593	0.76119	1
COG2385	Sporulation protein and related proteins	0.00064558	4.29112e-05	0.000112303	4.94764e-05	2.3087e-05	1.51641e-05	5.96898e-05	0.0445224	0.0108366
COG2386	ABC-type transport system involved in cytochrome c biogenesis, permease component	1.48021e-05	9.43332e-06	9.01113e-05	4.40203e-05	0.133103	0.034405	0.0974088	0.00358107	1
COG2388	Predicted acetyltransferase	0.000166952	1.79859e-05	0.00016229	5.16903e-05	0.94628	0.914888	0.962026	0.802519	1
COG2389	Uncharacterized metal-binding protein	0	0	0	0	1	NaN	0.999996	1	1
COG2390	Transcriptional regulator, contains sigma factor-related N-terminal domain	0.000124442	2.09718e-05	0.000459887	0.000140952	0.0399438	0.00445341	0.00171685	0.0145398	0.543187
COG2391	Predicted transporter component	9.49419e-06	6.75191e-06	0.000188036	7.7628e-05	0.0440896	0.00428851	0.0174068	1.35051e-06	0.573454
COG2401	ABC-type ATPase fused to a predicted acetyltransferase domain	5.66547e-06	5.66547e-06	1.85978e-05	1.85978e-05	0.594259	0.393573	0.475542	0.0536086	1
COG2402	Predicted nucleic acid-binding protein, contains PIN domain	0	0	0	0	1	NaN	0.999996	1	1
COG2403	Predicted GTPase	0	0	0	0	1	NaN	0.999996	1	1
COG2404	Predicted phosphohydrolase (DHH superfamily)	3.44651e-06	3.44651e-06	0	0	0.35885	0.528757	0.996873	0.274316	1
COG2405	Predicted nucleic acid-binding protein, contains PIN domain	3.34719e-05	1.33242e-05	1.68819e-05	1.68819e-05	0.533597	0.486934	0.485693	0.490485	1
COG2406	Protein distantly related to bacterial ferritins	6.15778e-05	1.57897e-05	0	0	0.00325197	0.0276445	0.99639	0.000127801	0.0989344
COG2407	L-fucose isomerase and related proteins	0.000647074	4.4679e-05	0.000364813	0.000128992	0.0643204	0.0222478	0.0405425	0.500026	0.71996
COG2409	Predicted drug exporters of the RND superfamily	5.08761e-06	2.82856e-06	6.97987e-05	4.13991e-05	0.159584	0.0318896	0.0111706	2.81455e-05	1
COG2410	Uncharacterized conserved protein	0	0	0	0	1	NaN	0.999996	1	1
COG2411	Uncharacterized conserved protein	0	0	0	0	1	NaN	0.999996	1	1
COG2413	Predicted nucleotidyltransferase	0	0	0	0	1	NaN	0.999996	1	1
COG2414	Aldehyde:ferredoxin oxidoreductase	0.000100313	2.279e-05	8.92566e-05	5.43898e-05	0.88218	0.825337	0.842902	0.883874	1
COG2419	Uncharacterized conserved protein	0	0	0	0	1	NaN	0.999996	1	1
COG2421	Predicted acetamidase/formamidase	5.01255e-05	1.16337e-05	5.08041e-05	3.24644e-05	0.987345	0.980482	0.916615	0.858733	1
COG2423	Predicted ornithine cyclodeaminase, mu-crystallin homolog	8.88339e-05	2.23355e-05	1.2883e-05	7.73844e-06	0.00945248	0.0509675	0.0090301	0.0148081	0.210123
COG2425	Uncharacterized protein containing a von Willebrand factor type A (vWA) domain	0.000163869	2.43353e-05	0.000148561	9.19305e-05	0.898384	0.827927	0.866387	0.889212	1
COG2427	Uncharacterized conserved protein	0	0	0	0	1	NaN	0.999996	1	1
COG2428	Uncharacterized conserved protein	0	0	0	0	1	NaN	0.999996	1	1
COG2429	Uncharacterized conserved protein	0	0	0	0	1	NaN	0.999996	1	1
COG2433	Uncharacterized conserved protein	0	0	0	0	1	NaN	0.999996	1	1
COG2440	Ferredoxin-like protein	1.62842e-05	8.77227e-06	0.00018217	3.15666e-05	0.000659628	2.51584e-05	0.011257	1.77775e-06	0.0393784
COG2441	Predicted butyrate kinase	0	0	0	0	1	NaN	0.999996	1	1
COG2442	Uncharacterized conserved protein	0	0	0	0	1	NaN	0.999996	1	1
COG2443	Preprotein translocase subunit Sss1	0	0	0	0	1	NaN	0.999996	1	1
COG2445	Uncharacterized conserved protein	7.92598e-06	7.92598e-06	0	0	0.38111	0.528757	0.996742	0.0202536	1
COG2450	Uncharacterized conserved protein	0	0	0	0	1	NaN	0.999996	1	1
COG2451	Ribosomal protein L35AE/L33A	0	0	0	0	1	NaN	0.999996	1	1
COG2452	Predicted site-specific integrase-resolvase	0.00027531	4.49534e-05	9.26031e-05	5.90178e-05	0.0327308	0.0398651	0.0427343	0.0832243	0.478704
COG2453	Predicted protein-tyrosine phosphatase	1.97508e-05	1.62798e-05	2.53228e-05	2.53228e-05	0.883351	0.854351	0.861111	0.516366	1
COG2454	Uncharacterized conserved protein	1.47708e-06	1.47708e-06	0	0	1	0.528757	0.997013	0.587865	1
COG2456	Uncharacterized conserved protein	0	0	0	0	1	NaN	0.999996	1	1
COG2457	Uncharacterized conserved protein	0	0	0	0	1	NaN	0.999996	1	1
COG2461	Uncharacterized conserved protein	8.61822e-05	1.8249e-05	1.69294e-05	1.01661e-05	0.00800459	0.0348054	0.00964449	0.00818405	0.185768
COG2501	Uncharacterized conserved protein	0.000306176	3.35717e-05	0.000141403	5.74192e-05	0.0320085	0.0239351	0.0297771	0.190445	0.472018
COG2502	Asparagine synthetase A	0.000377465	3.48471e-05	0.000151542	4.52832e-05	0.00298152	0.00335106	0.00312615	0.114973	0.0956039
COG2503	Predicted secreted acid phosphatase	1.4704e-05	1.02478e-05	1.68819e-05	1.68819e-05	0.931145	0.910748	0.900681	0.508283	1
COG2508	Regulator of polyketide synthase expression	0.000465378	3.65726e-05	0.000806401	0.000163282	0.0674602	0.0140035	0.010868	0.282563	0.743704
COG2509	Uncharacterized FAD-dependent dehydrogenases	0.000871211	7.5465e-05	0.00020497	9.24897e-05	0.000382584	0.000325525	0.000633513	0.21446	0.034918
COG2510	Predicted membrane protein	0.000104974	1.23275e-05	5.60106e-05	3.36772e-05	0.230062	0.112533	0.173507	0.693681	1
COG2511	Archaeal Glu-tRNAGln amidotransferase subunit E (contains GAD domain)	0	0	0	0	1	NaN	0.999996	1	1
COG2512	Uncharacterized membrane-associated protein/domain	0	0	0	0	1	NaN	0.999996	1	1
COG2513	PEP phosphonomutase and related enzymes	8.12375e-05	1.84256e-05	6.7832e-05	4.93791e-05	0.840584	0.755503	0.795436	0.828485	1
COG2514	Predicted ring-cleavage extradiol dioxygenase	7.92598e-06	7.92598e-06	0	0	0.38111	0.528757	0.996742	0.189637	1
COG2515	1-aminocyclopropane-1-carboxylate deaminase	9.22305e-05	1.56944e-05	0.000185314	0.000114591	0.515539	0.245433	0.151568	0.19709	1
COG2516	Biotin synthase-related enzyme	2.46179e-06	2.46179e-06	0	0	0.592119	0.528757	0.996929	0.126258	1
COG2517	Predicted RNA-binding protein containing a C-terminal EMAP domain	0	0	0	0	1	NaN	0.999996	1	1
COG2518	Protein-L-isoaspartate carboxylmethyltransferase	2.62652e-05	1.14543e-05	6.49263e-05	4.5305e-05	0.503821	0.272212	0.269385	0.116613	1
COG2519	tRNA(1-methyladenosine) methyltransferase and related methyltransferases	3.46327e-05	1.45234e-05	0.000146122	9.15975e-05	0.292067	0.0980473	0.0835756	0.0203596	1
COG2520	Predicted methyltransferase	0	0	0	0	1	NaN	0.999996	1	1
COG2521	Predicted archaeal methyltransferase	0	0	0	0	1	NaN	0.999996	1	1
COG2522	Predicted transcriptional regulator	0	0	0	0	1	NaN	0.999996	1	1
COG2524	Predicted transcriptional regulator, contains C-terminal CBS domains	0	0	0	0	1	NaN	0.999996	1	1
COG2603	Predicted ATPase	8.01712e-06	5.47757e-06	0.000106771	8.57524e-05	0.312974	0.0972196	0.0408944	9.93963e-05	1
COG2604	Uncharacterized protein conserved in bacteria	2.87088e-05	1.7138e-05	1.54982e-05	1.54982e-05	0.649978	0.647289	0.613577	0.644807	1
COG2605	Predicted kinase related to galactokinase and mevalonate kinase	0.000251348	5.09814e-05	9.35436e-05	5.45199e-05	0.0596172	0.0920846	0.0688634	0.317809	0.688423
COG2606	Uncharacterized conserved protein	0.000599002	5.6714e-05	0.000758972	0.000176615	0.484708	0.280799	0.267396	0.512166	1
COG2607	Predicted ATPase (AAA+ superfamily)	0.000296358	4.98027e-05	8.85714e-05	5.59471e-05	0.0194854	0.0313025	0.0273074	0.183796	0.349072
COG2608	Copper chaperone	0.000205961	3.38559e-05	0.000137052	2.46668e-05	0.139106	0.230651	0.174631	0.764284	1
COG2609	Pyruvate dehydrogenase complex, dehydrogenase (E1) component	1.62626e-05	1.28486e-05	0.000113175	2.06275e-05	0.00281991	0.00174964	0.132961	0.00132188	0.091981
COG2610	H+/gluconate symporter and related permeases	0.000482668	8.10129e-05	0.000860636	0.00029717	0.282542	0.120065	0.113297	0.234374	1
COG2703	Hemerythrin	0.000159107	4.80623e-05	3.39948e-05	1.96278e-05	0.0362268	0.123072	0.030126	0.0829125	0.507173
COG2704	Anaerobic C4-dicarboxylate transporter	0.000152298	4.33376e-05	0.000260554	0.000147914	0.572924	0.363803	0.353309	0.255788	1
COG2706	3-carboxymuconate cyclase	0.000283913	2.60908e-05	0.000338854	2.5922e-05	0.181569	0.23055	0.284019	0.573686	1
COG2710	Nitrogenase molybdenum-iron protein, alpha and beta chains	0.000133496	4.39587e-05	0.000232834	9.06206e-05	0.424214	0.2847	0.339722	0.243876	1
COG2716	Glycine cleavage system regulatory protein	0	0	8.19743e-05	6.15584e-05	0.24214	0.0574045	0.996488	0	1
COG2717	Predicted membrane protein	1.53069e-05	9.12845e-06	9.66795e-05	4.531e-05	0.113357	0.0262411	0.0750297	0.00149464	1
COG2719	Uncharacterized conserved protein	1.10483e-05	1.10483e-05	8.04245e-05	6.00626e-05	0.319184	0.121527	0.235282	0.00129935	1
COG2730	Endoglucanase	0.000359807	5.24801e-05	0.000730812	0.000487009	0.541284	0.265358	0.164396	0.147326	1
COG2732	Barstar, RNAse (barnase) inhibitor	9.61879e-06	6.38908e-06	3.23801e-05	1.87287e-05	0.312581	0.165409	0.270077	0.038405	1
COG2733	Predicted membrane protein	7.44514e-05	2.93715e-05	0.000123487	7.35627e-05	0.622079	0.463648	0.484167	0.265806	1
COG2739	Uncharacterized protein conserved in bacteria	0.000152197	2.03898e-05	8.34879e-05	3.28439e-05	0.110283	0.0942407	0.105159	0.504615	1
COG2740	Predicted nucleic-acid-binding protein implicated in transcription termination	0.000274876	3.65009e-05	0.000118721	5.78738e-05	0.0450295	0.0394503	0.0374863	0.29208	0.580731
COG2746	Aminoglycoside N3'-acetyltransferase	3.24664e-05	1.3927e-05	2.48621e-05	1.62633e-05	0.777712	0.754532	0.768364	0.87193	1
COG2747	Negative regulator of flagellin synthesis (anti-sigma28 factor)	0	0	9.34593e-05	5.97632e-05	0.15867	0.0299515	0.994427	0	1
COG2755	Lysophospholipase L1 and related esterases	0.00142176	0.000105078	0.000516302	0.000152615	0.000771765	0.000534933	0.000615628	0.175411	0.0421009
COG2759	Formyltetrahydrofolate synthetase	0.000760144	4.1887e-05	0.000356791	0.000138638	0.0190567	0.00334666	0.0135875	0.328843	0.343888
COG2761	Predicted dithiol-disulfide isomerase involved in polyketide biosynthesis	3.87862e-05	1.74733e-05	9.86823e-05	3.30037e-05	0.148235	0.105157	0.222973	0.0605847	1
COG2764	Uncharacterized protein conserved in bacteria	3.63963e-06	3.63963e-06	0.000132993	4.93491e-05	0.0252902	0.00173068	0.0307719	1.72001e-08	0.406869
COG2766	Putative Ser protein kinase	4.7761e-07	4.7761e-07	9.66145e-05	6.72326e-05	0.207476	0.0436989	0.00113824	6.35917e-10	1
COG2768	Uncharacterized Fe-S center protein	0.000548154	6.37227e-05	0.000121939	6.05931e-05	0.000817939	0.00189709	0.00165123	0.0370017	0.0431324
COG2771	DNA-binding HTH domain-containing proteins	0.000154597	2.99184e-05	0.000485593	0.000221147	0.186395	0.0448074	0.0169136	0.0161448	1
COG2801	Transposase and inactivated derivatives	0.00150993	0.000103026	0.00419285	0.00120333	0.0498712	0.00517891	0.000478265	0.0283224	0.612081
COG2802	Uncharacterized protein, similar to the N-terminal domain of Lon protease	0	0	0	0	1	NaN	0.999996	1	1
COG2804	Type II secretory pathway, ATPase PulE/Tfp pilus assembly pathway, ATPase PilB	0.000239887	6.03811e-05	0.000335288	0.000135386	0.607409	0.464351	0.478494	0.393592	1
COG2805	Tfp pilus assembly protein, pilus retraction ATPase PilT	0.000221068	4.56295e-05	0.000237082	8.1881e-05	0.892507	0.857252	0.82746	0.725875	1
COG2807	Cyanate permease	2.37219e-05	8.14994e-06	0.000143858	5.56397e-05	0.0573514	0.00790177	0.0079644	0.000307782	0.66732
COG2808	Transcriptional regulator	0	0	0	0	1	NaN	0.999996	1	1
COG2810	Predicted type IV restriction endonuclease	0	0	0	0	1	NaN	0.999996	1	1
COG2811	Archaeal/vacuolar-type H+-ATPase subunit H	0	0	0	0	1	NaN	0.999996	1	1
COG2812	DNA polymerase III, gamma/tau subunits	0.000730311	5.07649e-05	0.000760996	0.000356197	0.946247	0.899236	0.927135	0.774451	1
COG2813	16S RNA G1207 methylase RsmC	4.82001e-05	1.60321e-05	0.000575962	0.000151007	0.00628956	0.000220288	0.000559688	2.84802e-07	0.157188
COG2814	Arabinose efflux permease	0.000356884	5.2047e-05	0.00104251	0.000213071	0.0110686	0.00106424	0.00159214	0.0164485	0.23368
COG2815	Uncharacterized protein conserved in bacteria	0.000401843	2.157e-05	0.000469271	0.000202783	0.79322	0.618326	0.644682	0.602178	1
COG2816	NTP pyrophosphohydrolases containing a Zn-finger, probably nucleic-acid-binding	0.000317098	4.54466e-05	0.00037218	0.000130574	0.752481	0.619139	0.655426	0.597703	1
COG2819	Predicted hydrolase of the alpha/beta superfamily	0.000211906	2.3396e-05	8.21042e-05	3.12392e-05	0.00789575	0.00894219	0.009405	0.131469	0.184527
COG2820	Uridine phosphorylase	0.000435766	4.05331e-05	0.00027843	5.42109e-05	0.0417743	0.0487048	0.0482715	0.509475	0.554573
COG2821	Membrane-bound lytic murein transglycosylase	2.36308e-05	1.70471e-05	0.00012227	0.000101022	0.435124	0.178355	0.202003	0.000536342	1
COG2822	Predicted periplasmic lipoprotein involved in iron transport	8.44714e-06	7.90834e-06	5.25277e-05	3.39771e-05	0.268996	0.100034	0.236453	0.000488815	1
COG2823	Predicted periplasmic or secreted lipoprotein	1.54448e-05	7.76202e-06	0.000212934	0.000141027	0.218697	0.0491214	0.0101423	7.43889e-08	1
[truncated: 1,870 more rows]
